# Supplementary material for: Ruthenium-Catalyzed Oxidative Synthesis of N-(2-triazine)indoles by C-H Activation
Source: MDPI journal article supplement (doi:10.3390/molecules28093676), 2023-04-24

# Ruthenium Catalyzed Oxidative Synthesis of *N*-(2-triazine)indoles by C-H Activation

Ming Zeng \*, Jia Qi Chen, Feng Ye Li, Hao Jie Li, Lan Zhao, Deng Zhao Jiang, Jun Dai and Wen Bo Liu

School of Pharmacy and Life Science, Jiujiang University, Jiujiang 332005, China

\* Correspondence: zengming@zjut.edu.cn

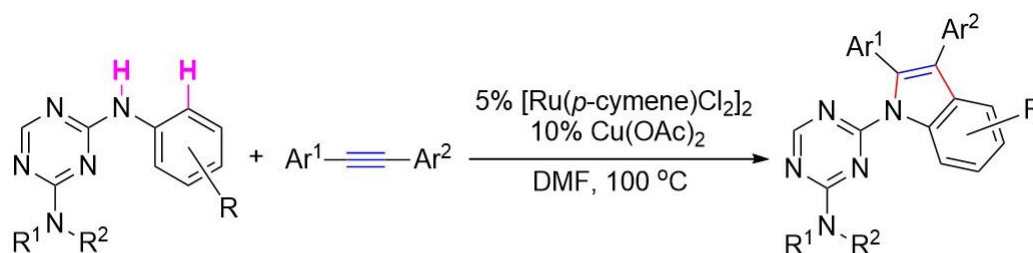

- 17 examples yields up to 76%
- Triazine ring as directing group
- Lower loading of oxidant

1,3,5 triazines, especially indole functionalized triazine derivatives, exhibit excellent activities, such as anti-tumor, antibacterial, and anti-inflammatory activities. Traditional methods for the synthesis of *N*-(2-triazine) indoles suffer from unstable materials and tedious operations. Transition-metal-catalyzed C-C/C-N coupling provides a powerful protocol for the synthesis of indoles by the C-H activation strategy. Here, we report the efficient ruthenium-catalyzed oxidative synthesis of *N*-(2-triazine) indoles by C-H activation from alkynes and various substituted triazine derivatives in a moderate to good yield, and all of the *N*-(2-triazine) indoles were characterized by  $^1\text{H}$  NMR,  $^{13}\text{C}$  NMR, and HRMS. This protocol can apply to the gram-scale synthesis of the *N*-(2-triazine) indole in a moderate yield. Moreover, the reaction is proposed to be performed via a six-membered ruthenacycle (II) intermediate, which suggests that the triazine ring could offer chelation assistance for the formation of *N*-(2-triazine) indoles.

## The $^1\text{H}$ and $^{13}\text{C}$ spectra of compounds

| Index      | Content                                      | Pages |
|------------|----------------------------------------------|-------|
| Figure S1  | $^1\text{H}$ spectra of <b>3a</b>            | S4    |
| Figure S2  | $^{13}\text{C}$ spectra of <b>3a</b>         | S5    |
| Figure S3  | $^1\text{H}$ spectra of <b>3b</b>            | S6    |
| Figure S4  | $^{13}\text{C}$ spectra of <b>3b</b>         | S7    |
| Figure S5  | $^1\text{H}$ spectra of <b>3c</b>            | S8    |
| Figure S6  | $^{13}\text{C}$ spectra of <b>3c</b>         | S9    |
| Figure S7  | $^1\text{H}$ spectra of <b>3d</b>            | S10   |
| Figure S8  | $^{13}\text{C}$ spectra of <b>3d</b>         | S11   |
| Figure S9  | $^1\text{H}$ spectra of <b>3e</b>            | S12   |
| Figure S10 | $^{13}\text{C}$ spectra of <b>3e</b>         | S13   |
| Figure S11 | $^1\text{H}$ spectra of <b>3f</b>            | S14   |
| Figure S12 | $^{13}\text{C}$ spectra of <b>3f</b>         | S15   |
| Figure S13 | $^1\text{H}$ spectra of <b>3g</b>            | S16   |
| Figure S14 | $^{13}\text{C}$ spectra of <b>3g</b>         | S17   |
| Figure S15 | $^1\text{H}$ spectra of <b>3h</b>            | S18   |
| Figure S16 | $^{13}\text{C}$ spectra of <b>3h</b>         | S19   |
| Figure S17 | $^{13}\text{C}$ spectra of <b>3i</b>         | S20   |
| Figure S18 | $^1\text{H}$ spectra of <b>3i</b>            | S21   |
| Figure S19 | $^{13}\text{C}$ spectra of <b>3j</b>         | S22   |
| Figure S20 | $^{13}\text{C}$ spectra of <b>3j</b>         | S23   |
| Figure S21 | $^1\text{H}$ spectra of <b>3k</b>            | S24   |
| Figure S22 | $^{13}\text{C}$ spectra of <b>3k</b>         | S25   |
| Figure S23 | $^1\text{H}$ spectra of <b>3m</b>            | S26   |
| Figure S24 | $^{13}\text{C}$ spectra of <b>3m</b>         | S27   |
| Figure S25 | $^1\text{H}$ spectra of <b>3n</b>            | S28   |
| Figure S26 | $^{13}\text{C}$ spectra of <b>3n</b>         | S29   |
| Figure S27 | $^1\text{H}$ spectra of <b>3o</b>            | S30   |
| Figure S28 | $^{13}\text{C}$ spectra of <b>3o</b>         | S31   |
| Figure S29 | $^{13}\text{C}$ spectra of <b>3p</b>         | S32   |
| Figure S30 | $^1\text{H}$ spectra of <b>3p</b>            | S33   |
| Figure S31 | $^{13}\text{C}$ spectra of <b>3q</b>         | S34   |
| Figure S32 | $^{13}\text{C}$ spectra of <b>3q</b>         | S35   |
| Figure S33 | $^1\text{H}$ spectra of <b>3r and 3r'</b>    | S36   |
| Figure S34 | $^{13}\text{C}$ spectra of <b>3r and 3r'</b> | S37   |
| Figure S35 | $^1\text{H}$ spectra of <b>1a</b>            | S38   |
| Figure S36 | $^{13}\text{C}$ spectra of <b>1a</b>         | S39   |
| Figure S37 | $^1\text{H}$ spectra of <b>1j</b>            | S40   |
| Figure S38 | $^{13}\text{C}$ spectra of <b>1j</b>         | S41   |
| Figure S39 | $^1\text{H}$ spectra of <b>1k</b>            | S42   |
| Figure S40 | $^{13}\text{C}$ spectra of <b>1k</b>         | S43   |
| Figure S41 | $^1\text{H}$ spectra of <b>1l</b>            | S44   |

|            |                                                                                                   |     |
|------------|---------------------------------------------------------------------------------------------------|-----|
| Figure S42 | $^{13}\text{C}$ spectra of <b>11</b>                                                              | S45 |
| Figure S43 | The analysis of relative yield<br>of the isomers <b>3r</b> and <b>3r'</b> by<br>$^1\text{H}$ NMR. | S46 |

---

PROTON\_01  
HT201120

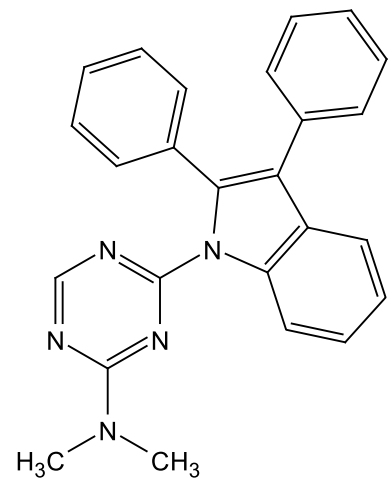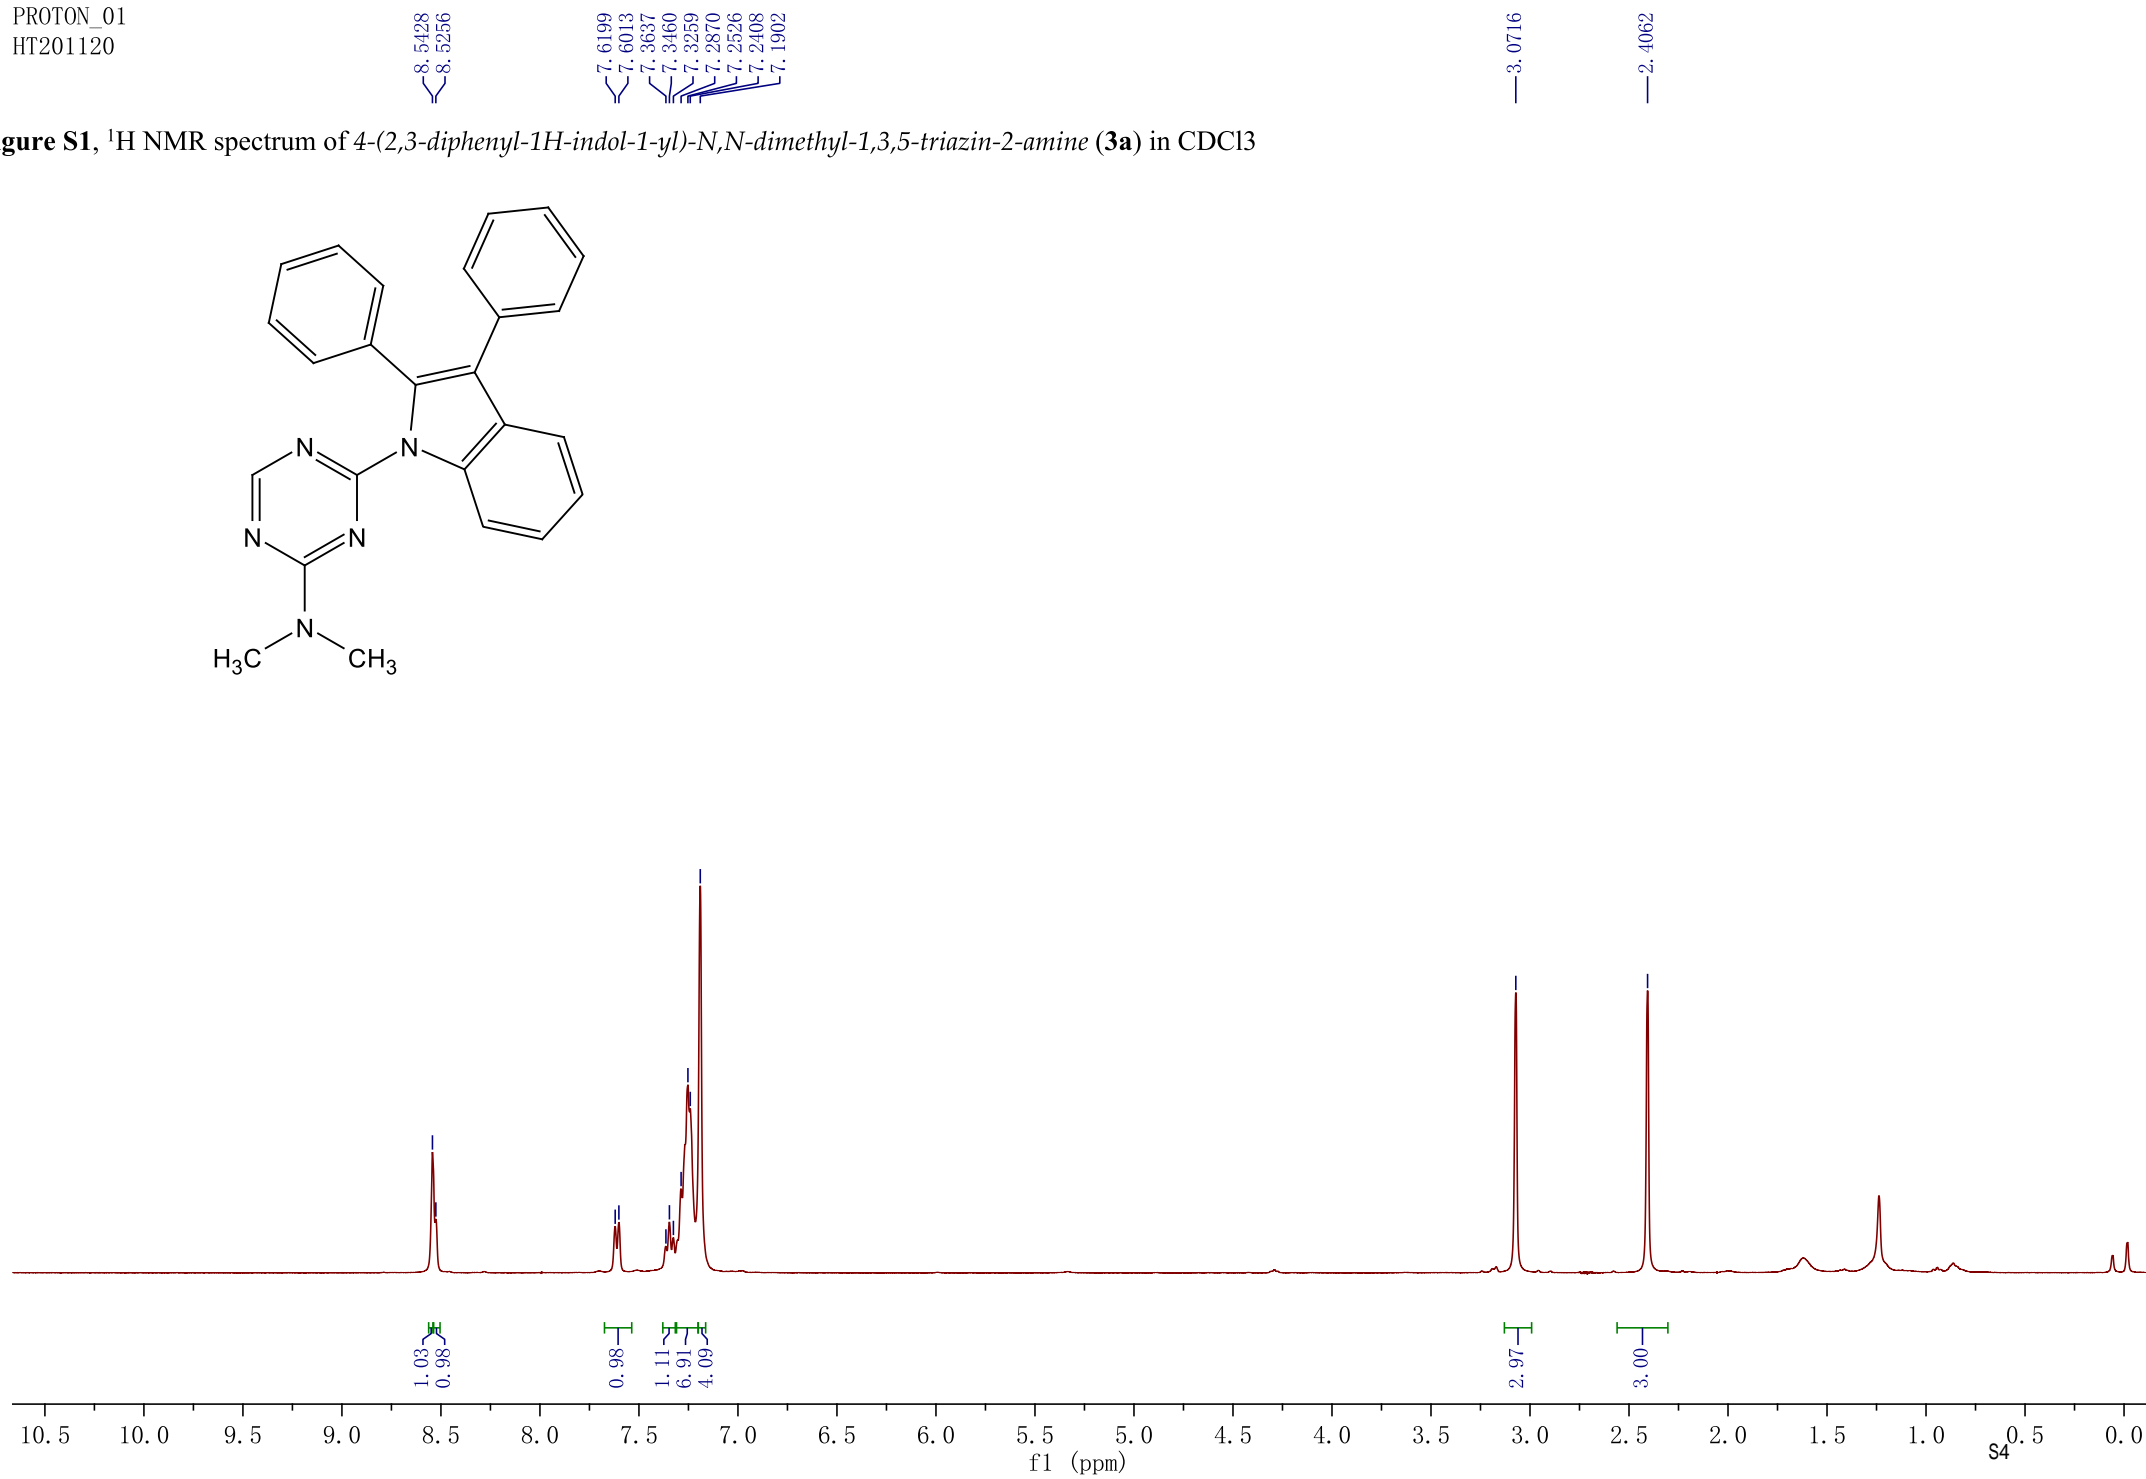



20201221-C13-WHF-HT201120  
20201221-C13-WHF-HT201120  
CDC13

166.2497  
164.1273  
162.9550

136.9288  
135.9586  
134.1111  
133.8647  
130.3848  
130.2008  
129.7703  
128.1488  
127.8042  
126.7782  
126.5456  
124.2590  
122.6470  
122.0544  
119.6210  
115.0074

77.2571  
77.0455  
76.8338

36.3460  
35.6192

29.7229

**Figure S2,**  $^{13}\text{C}$  NMR spectrum of 4-(2,3-diphenyl-1H-indol-1-yl)-N,N-dimethyl-1,3,5-triazin-2-amine (**3a**) in  $\text{CDCl}_3$

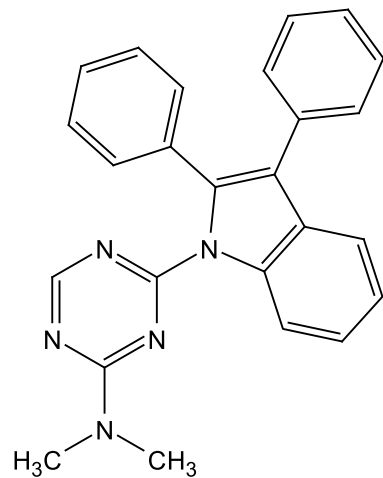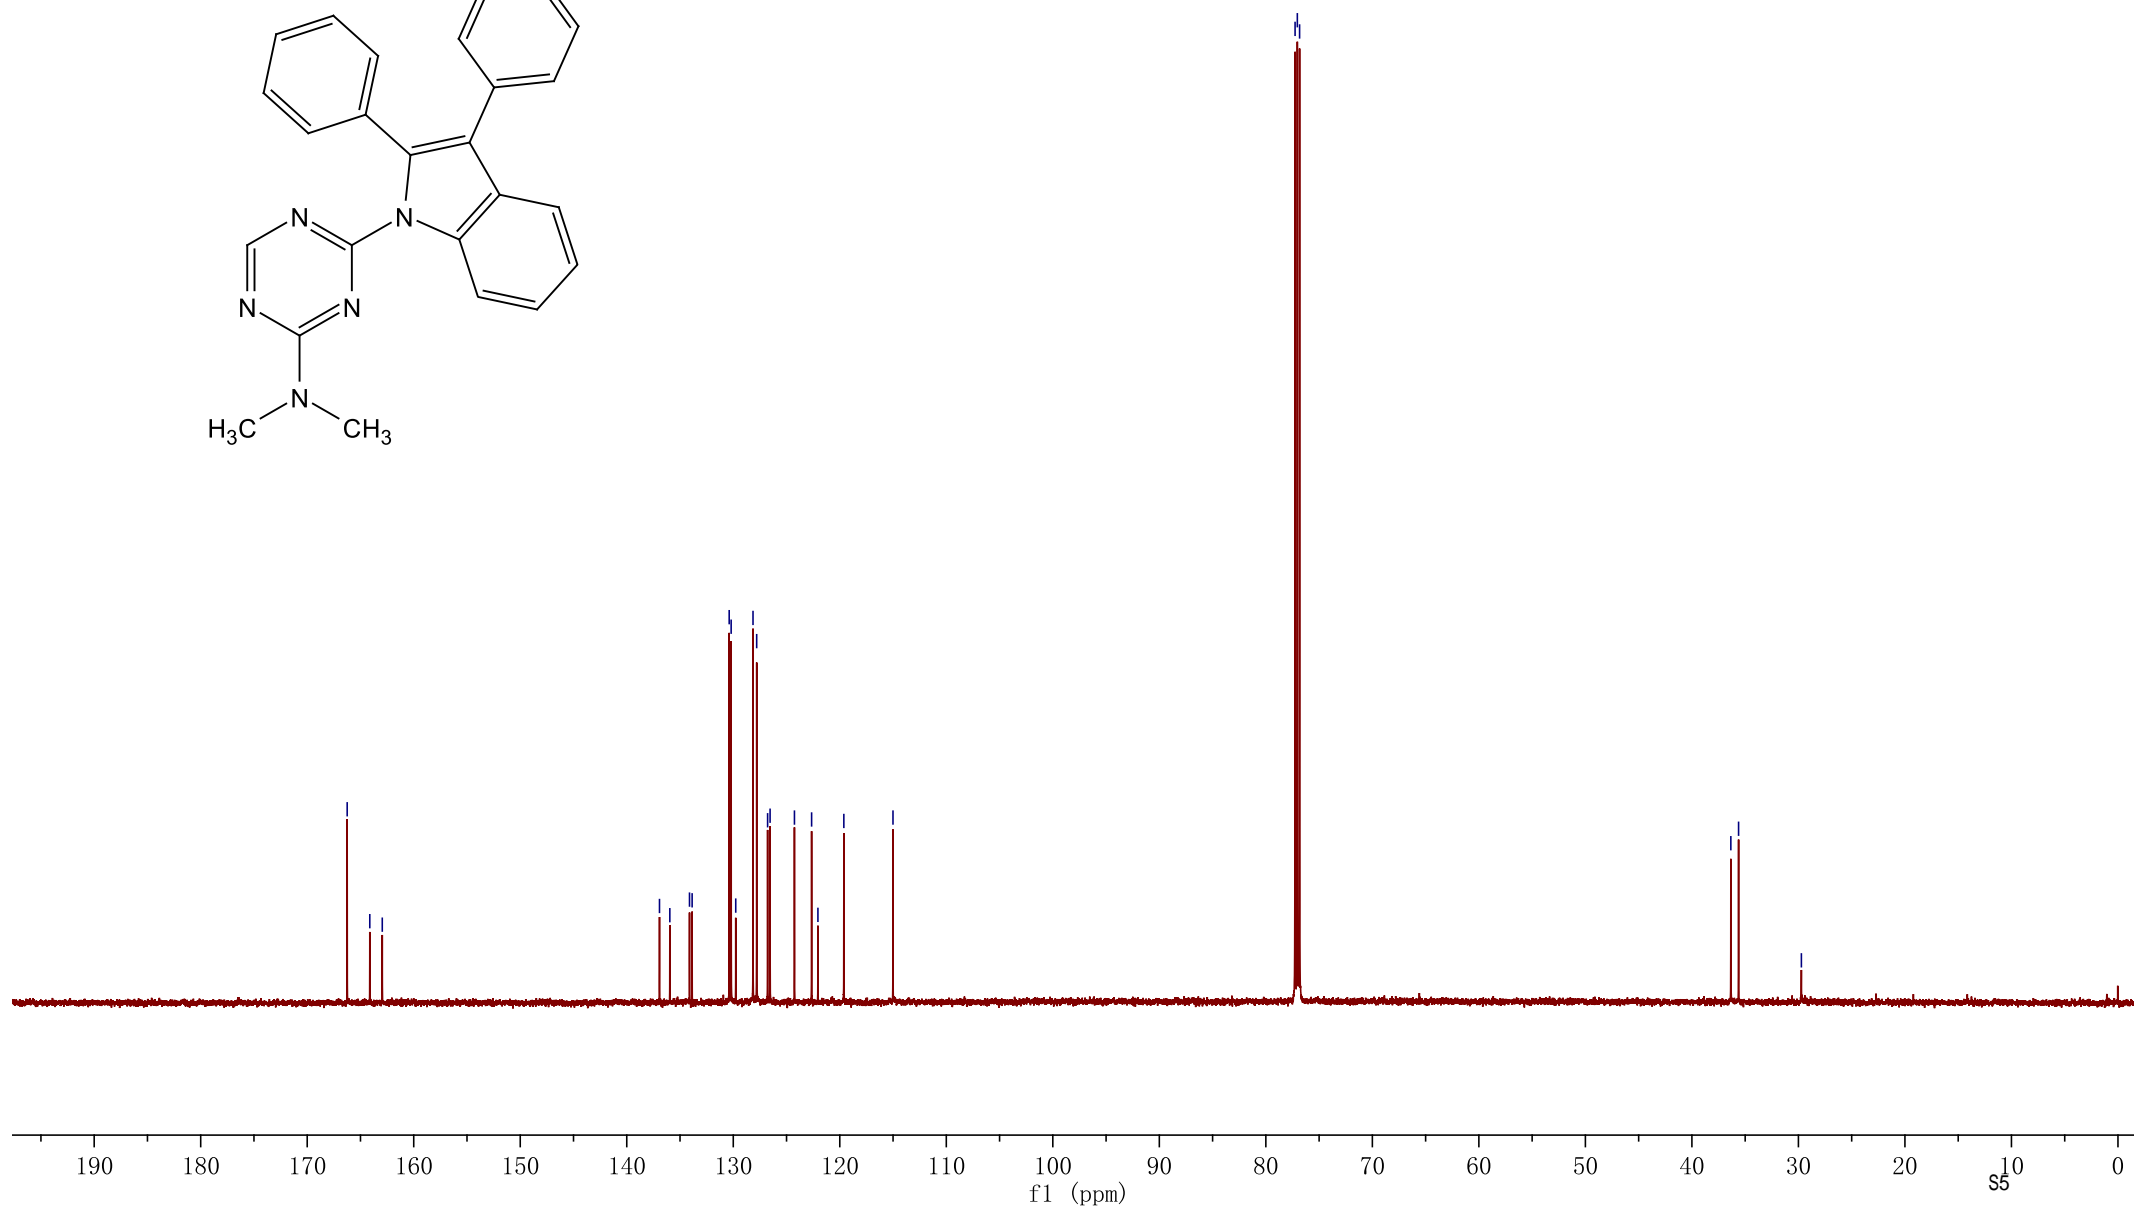

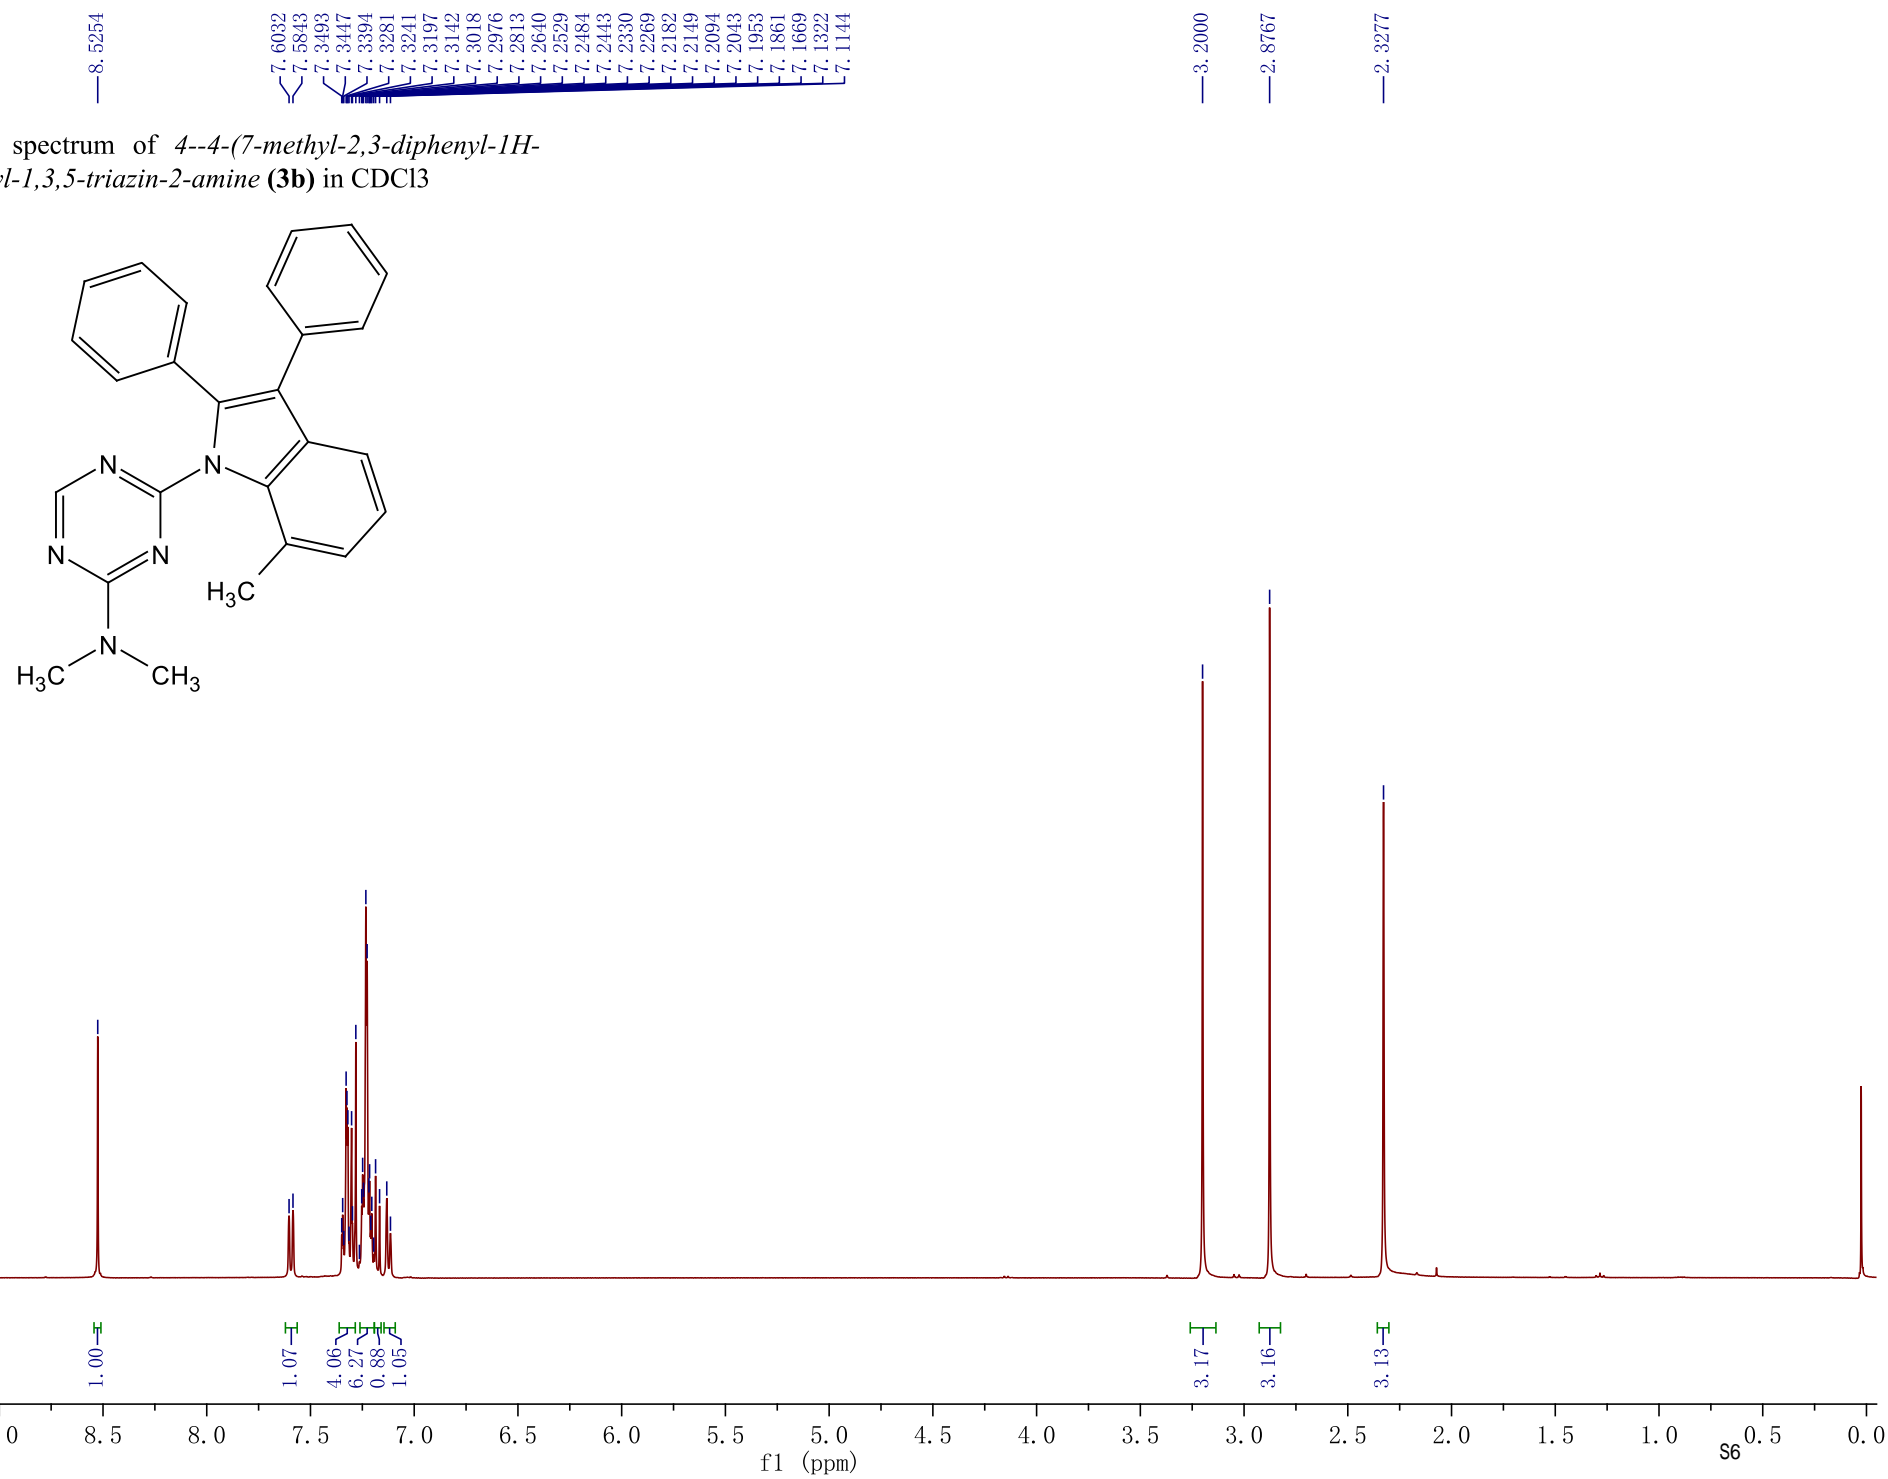

165.8925  
164.5306  
164.4068

137.1809  
135.5854  
134.3144  
132.4396  
131.1115  
130.3094  
129.3959  
128.1146  
127.6777  
127.4557  
126.5162  
126.2096  
122.6984  
122.0107  
119.4366  
117.7681

77.3593  
77.2458  
77.0417  
76.7241

36.6652  
36.2457

20.5575

**Figure S4**,  $^{13}\text{C}$  NMR spectrum of 4--4-(7-methyl-2,3-diphenyl-1*H*-indol-1-yl)-*N,N*-dimethyl-1,3,5-triazin-2-amine (**3b**) in  $\text{CDCl}_3$

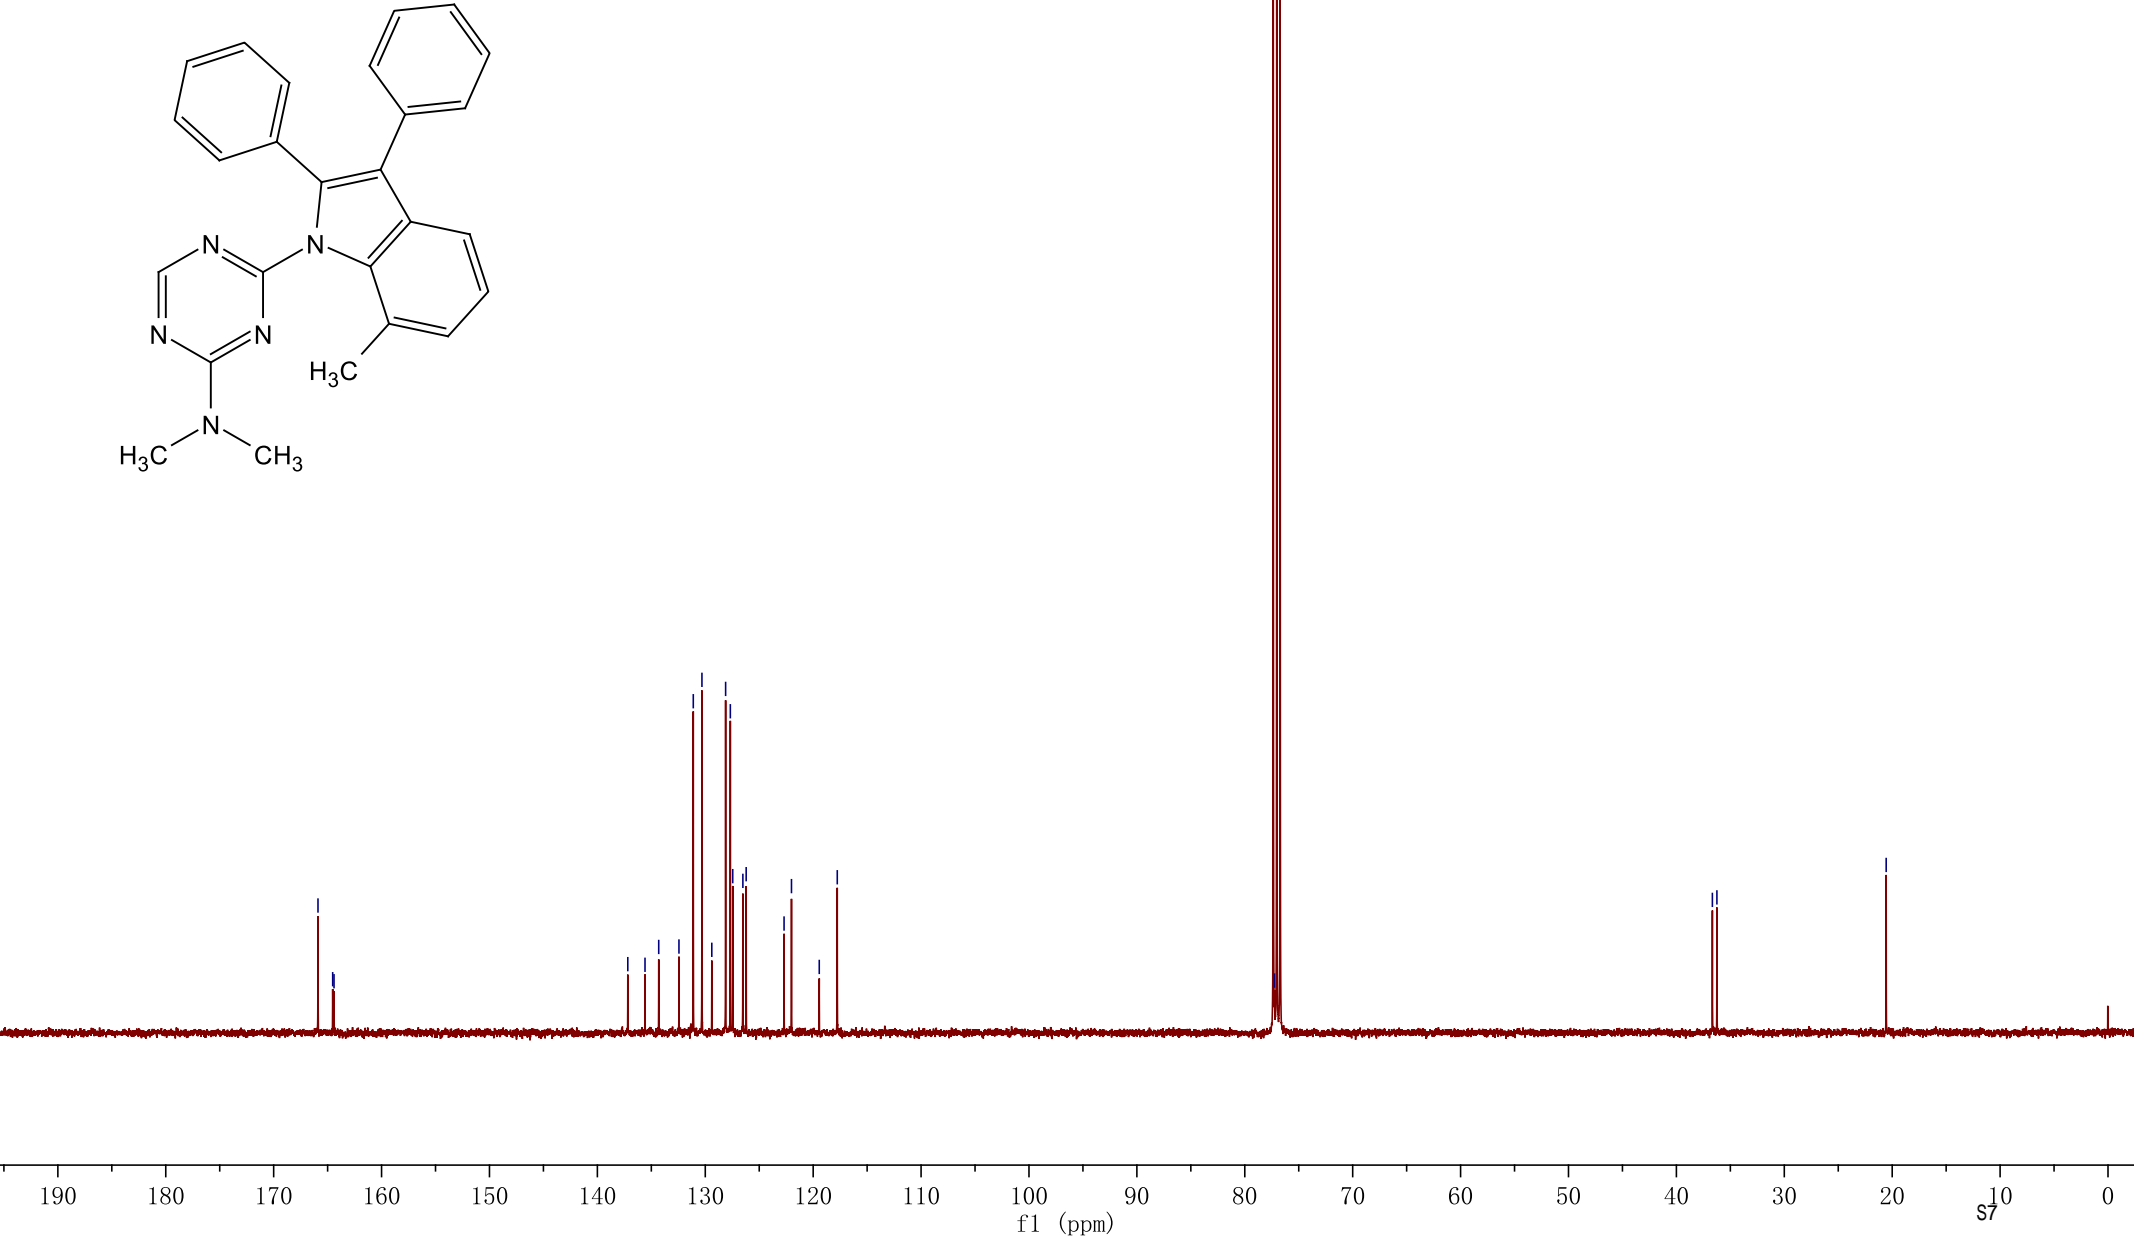

PROTON\_01  
zm-55

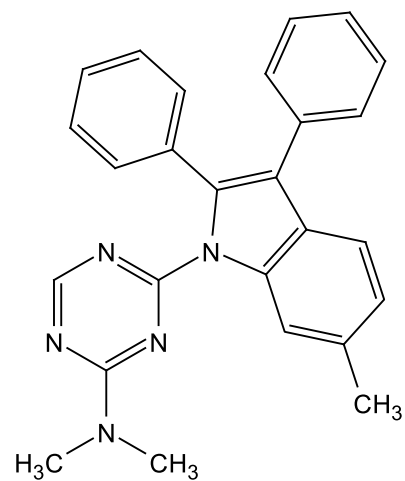

8.5695  
8.3717  
8.3006  
7.4799  
7.3075  
7.2896  
7.2861  
7.2789  
7.2718  
7.2553  
7.2505  
7.2423  
7.2385  
7.2288  
7.2204  
7.2167  
7.2121  
7.2076  
7.1997  
7.1881  
7.1741  
7.1687  
7.0941  
7.0740

3.0790

2.5288  
2.3987

**Figure S5,**  $^1\text{H}$  NMR spectrum of *N,N*-dimethyl-4-(6-methyl-2,3-diphenyl-1*H*-indol-1-yl)-1,3,5-triazin-2-amine (**3c**) in  $\text{CDCl}_3$

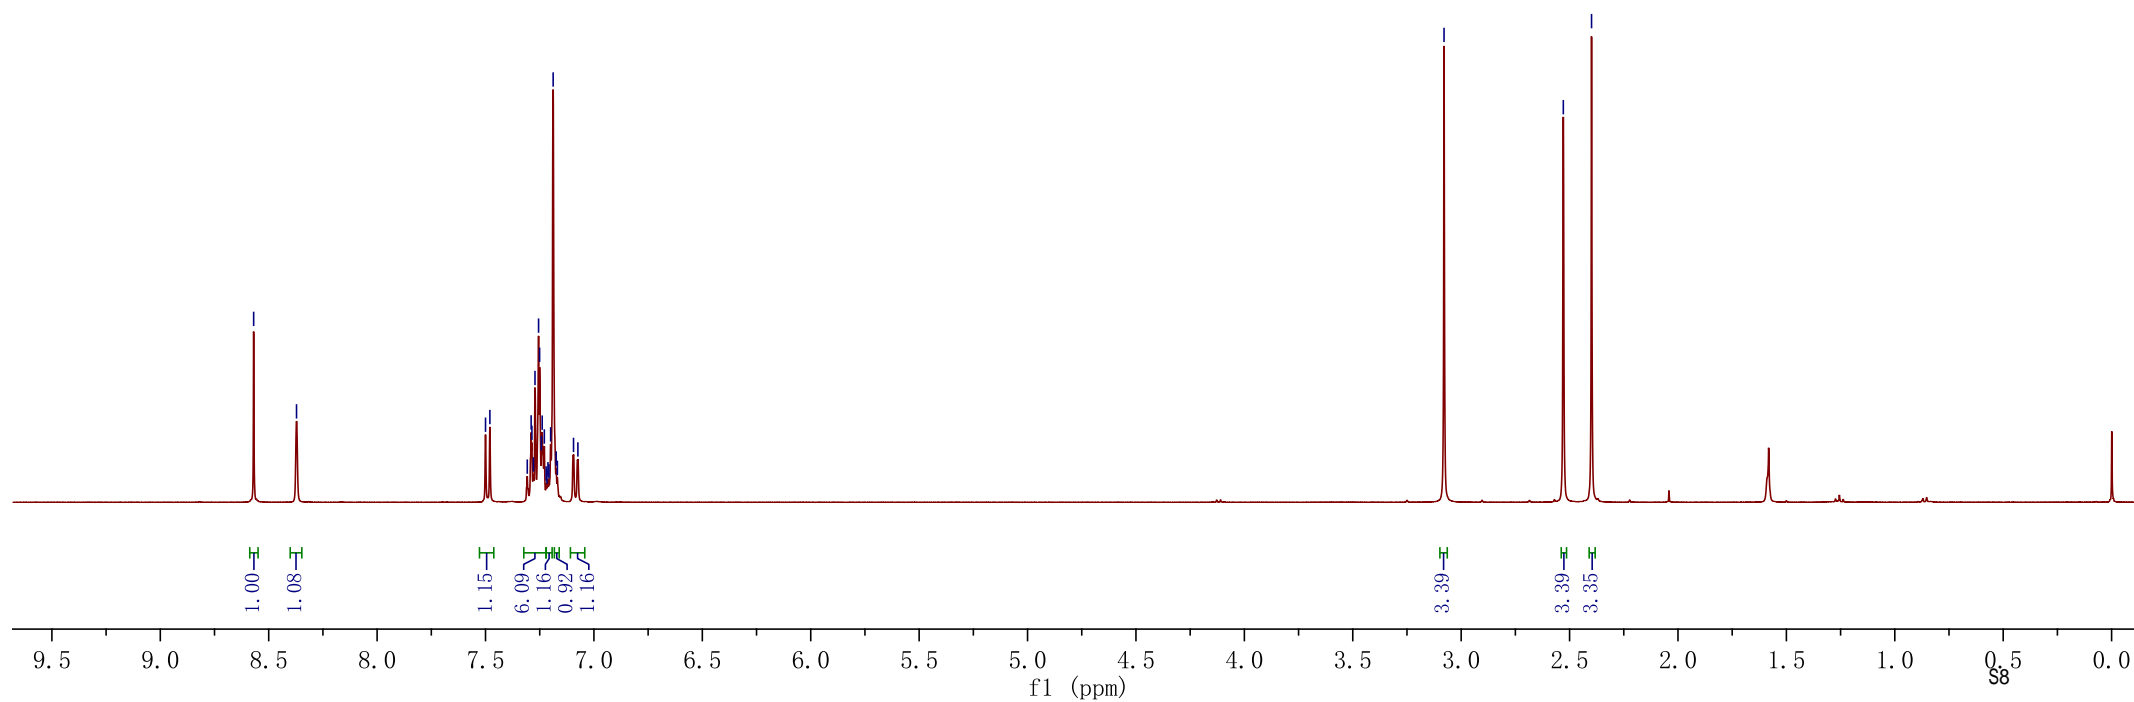

20210924-C13-WHF-55  
20210924-C13-WHF-55  
CDC13

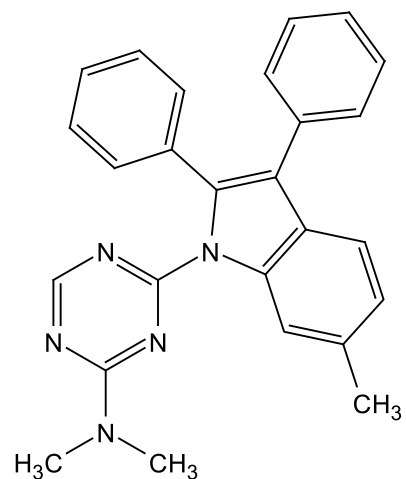

**Figure S6,**  $^{13}\text{C}$  NMR spectrum of *N,N*-dimethyl-4-(6-methyl-2,3-diphenyl-1H-indol-1-yl)-1,3,5-triazin-2-amine (**3c**) in  $\text{CDCl}_3$

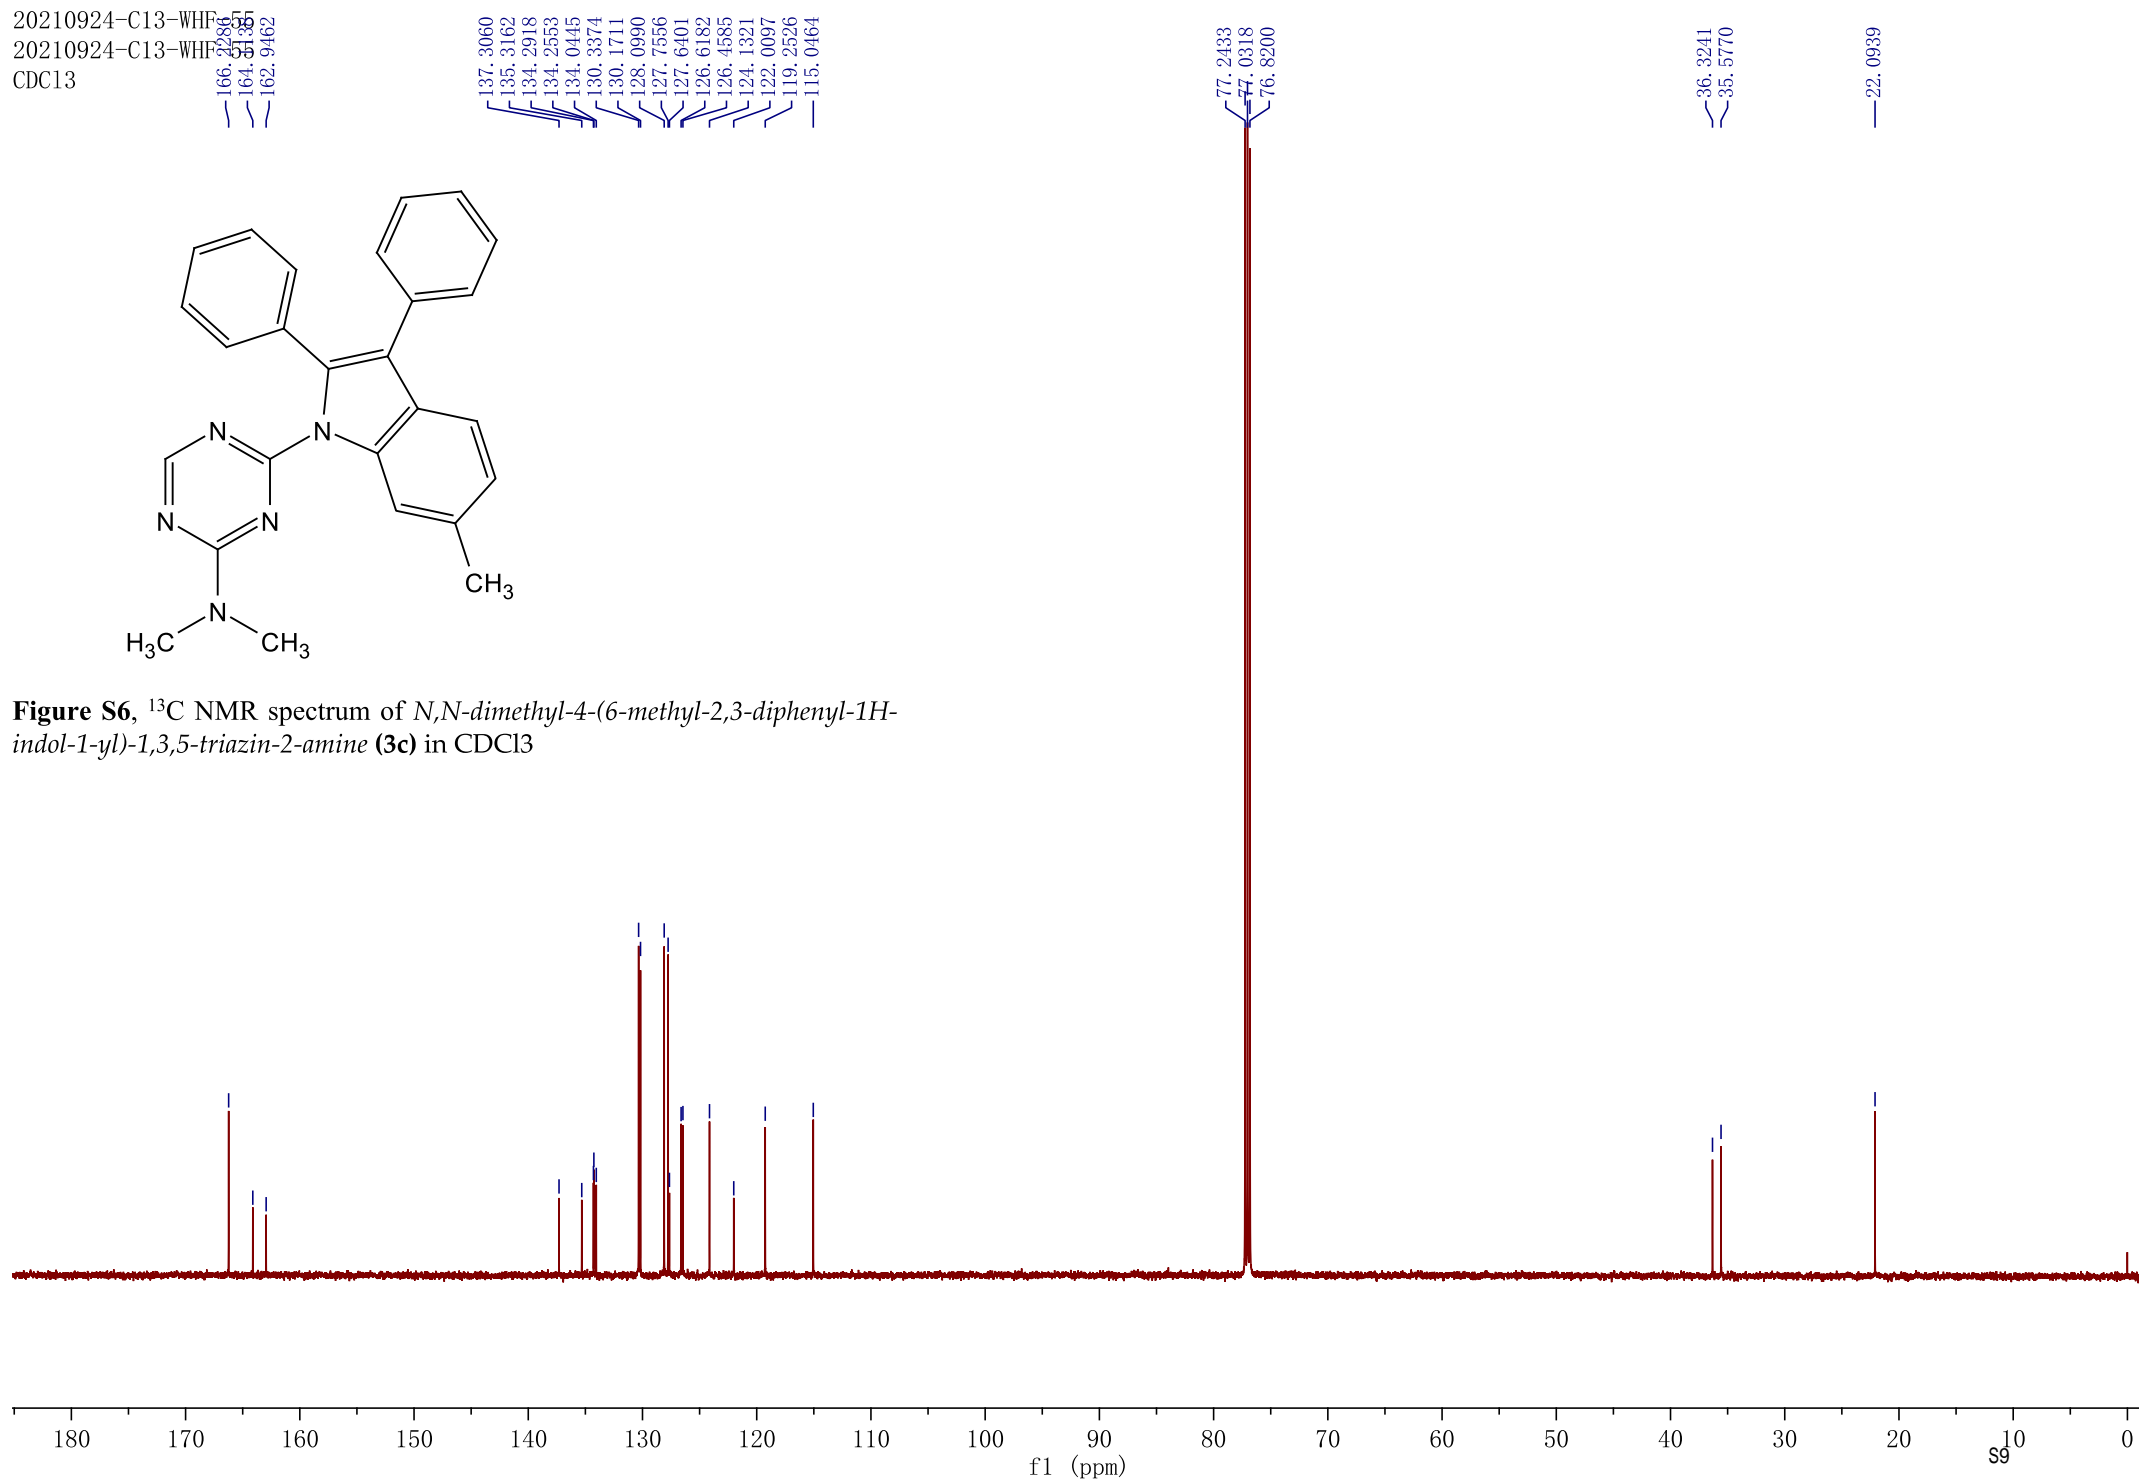

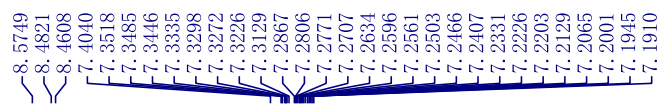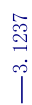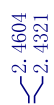

**Figure S7,** <sup>1</sup>H NMR spectrum of *N,N*-dimethyl-4-(5-methyl-2,3-diphenyl-1*H*-indol-1-yl)-1,3,5-triazin-2-amine (**3d**) in CDCl<sub>3</sub>

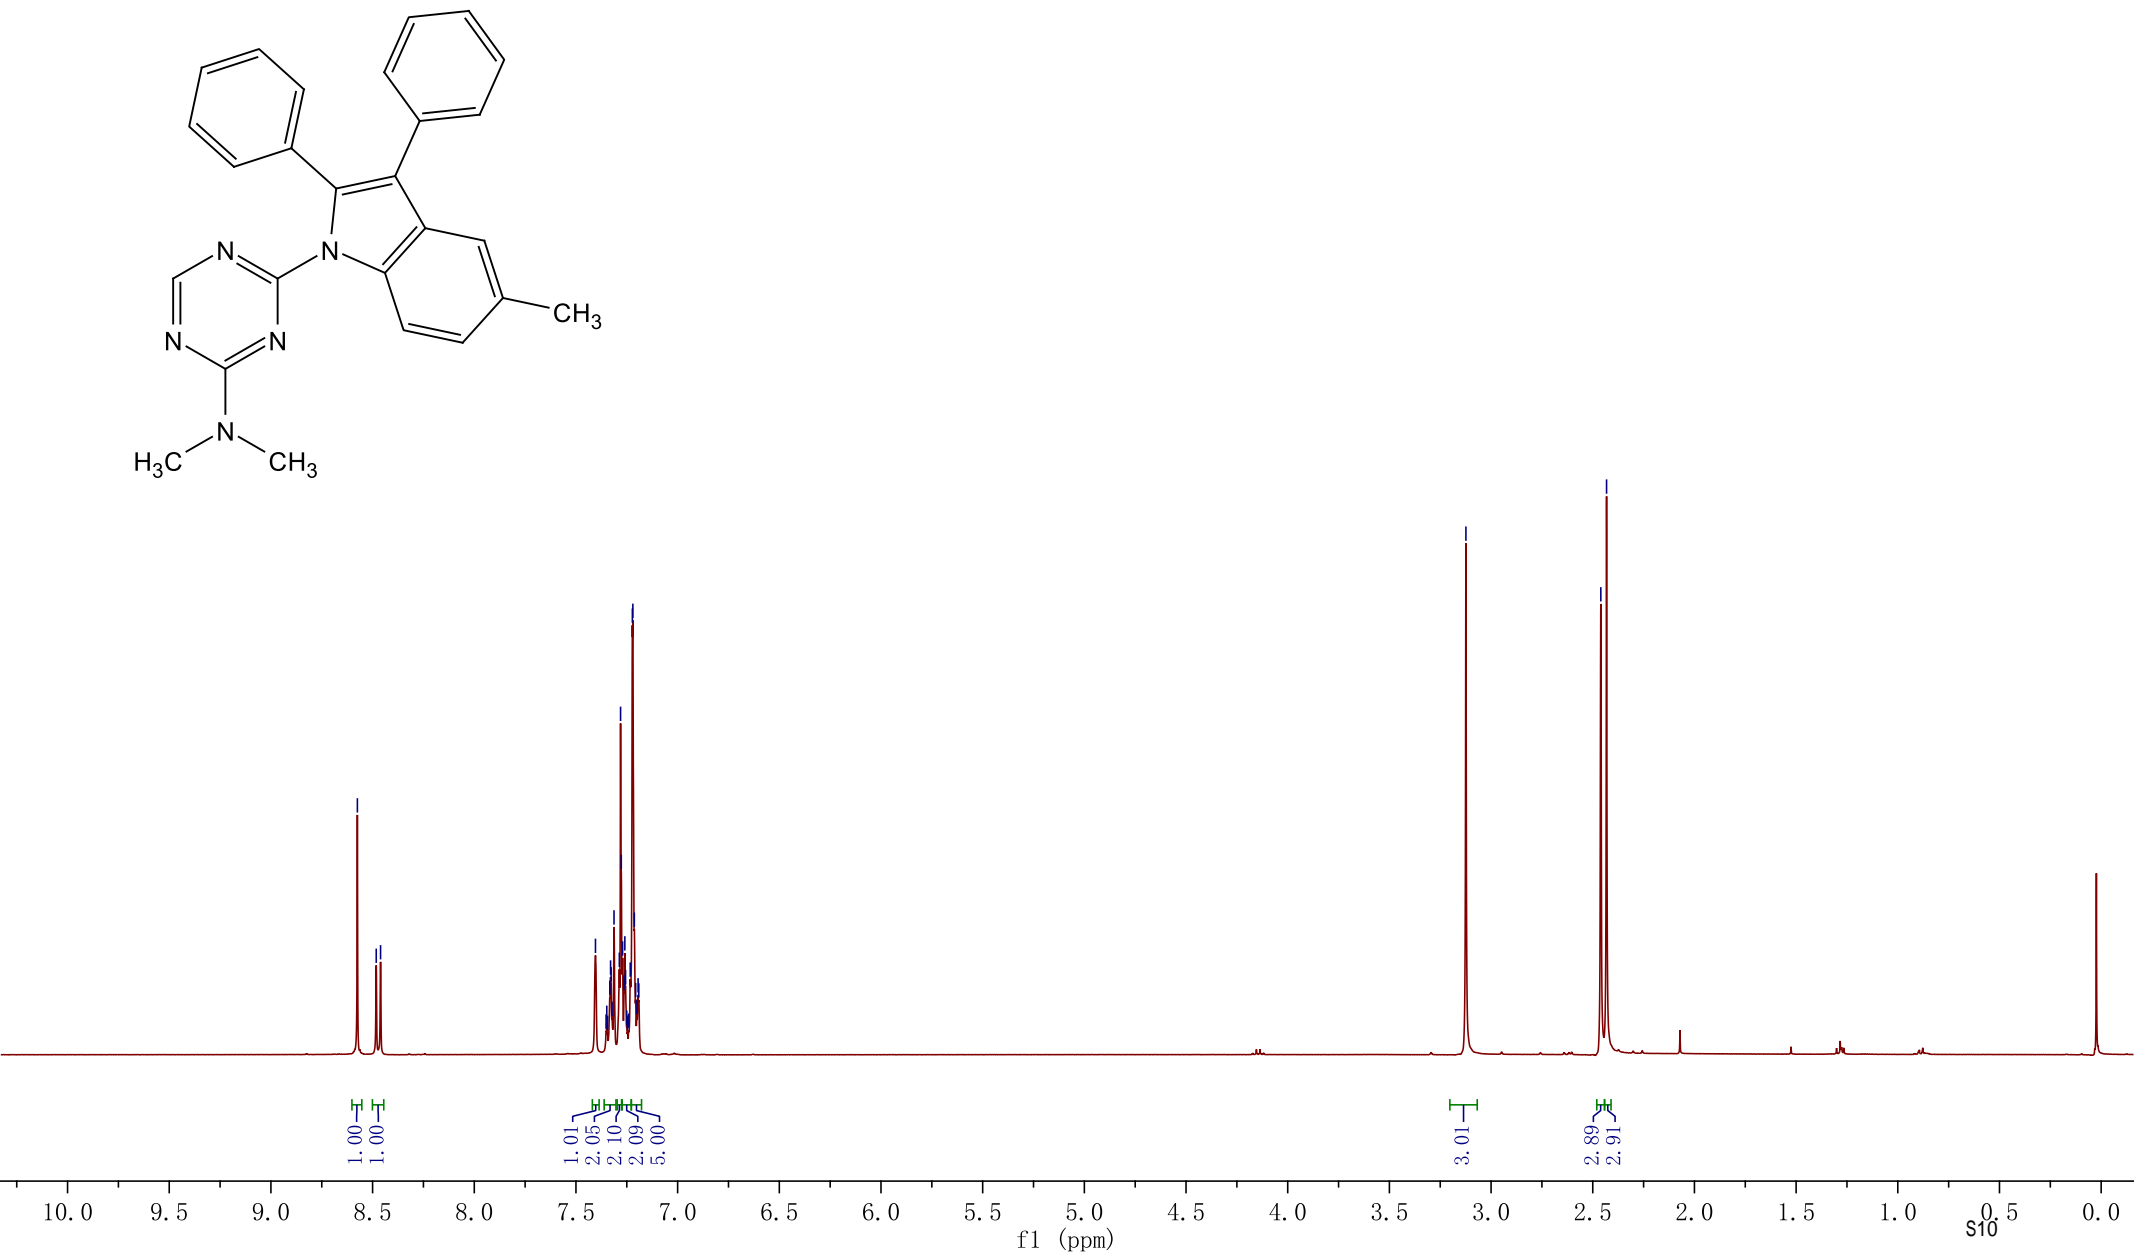

20220117zm  
F210607

165.8063  
163.5539  
162.7801

135.9662  
135.2014  
134.2338  
133.9042  
132.2656  
130.3896  
130.1550  
130.0465  
128.1305  
127.7738  
126.7192  
126.5333  
125.7377  
122.2517  
119.4140  
114.9562

77.3545  
77.0856  
76.7195

36.4719  
35.6538

21.4134

**Figure S8,**  $^{13}\text{C}$  NMR spectrum of *N,N*-dimethyl-4-(5-methyl-2,3-diphenyl-1*H*-indol-1-yl)-1,3,5-triazin-2-amine (**3d**) in  $\text{CDCl}_3$

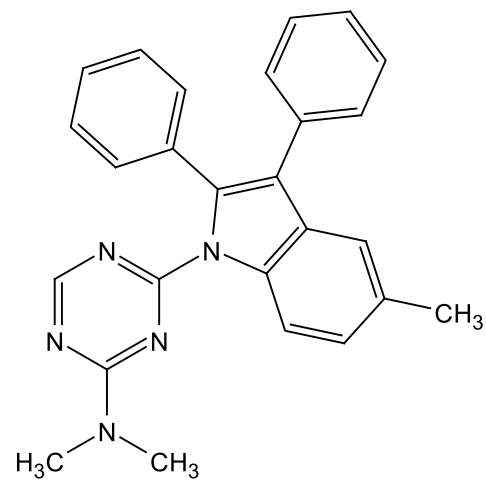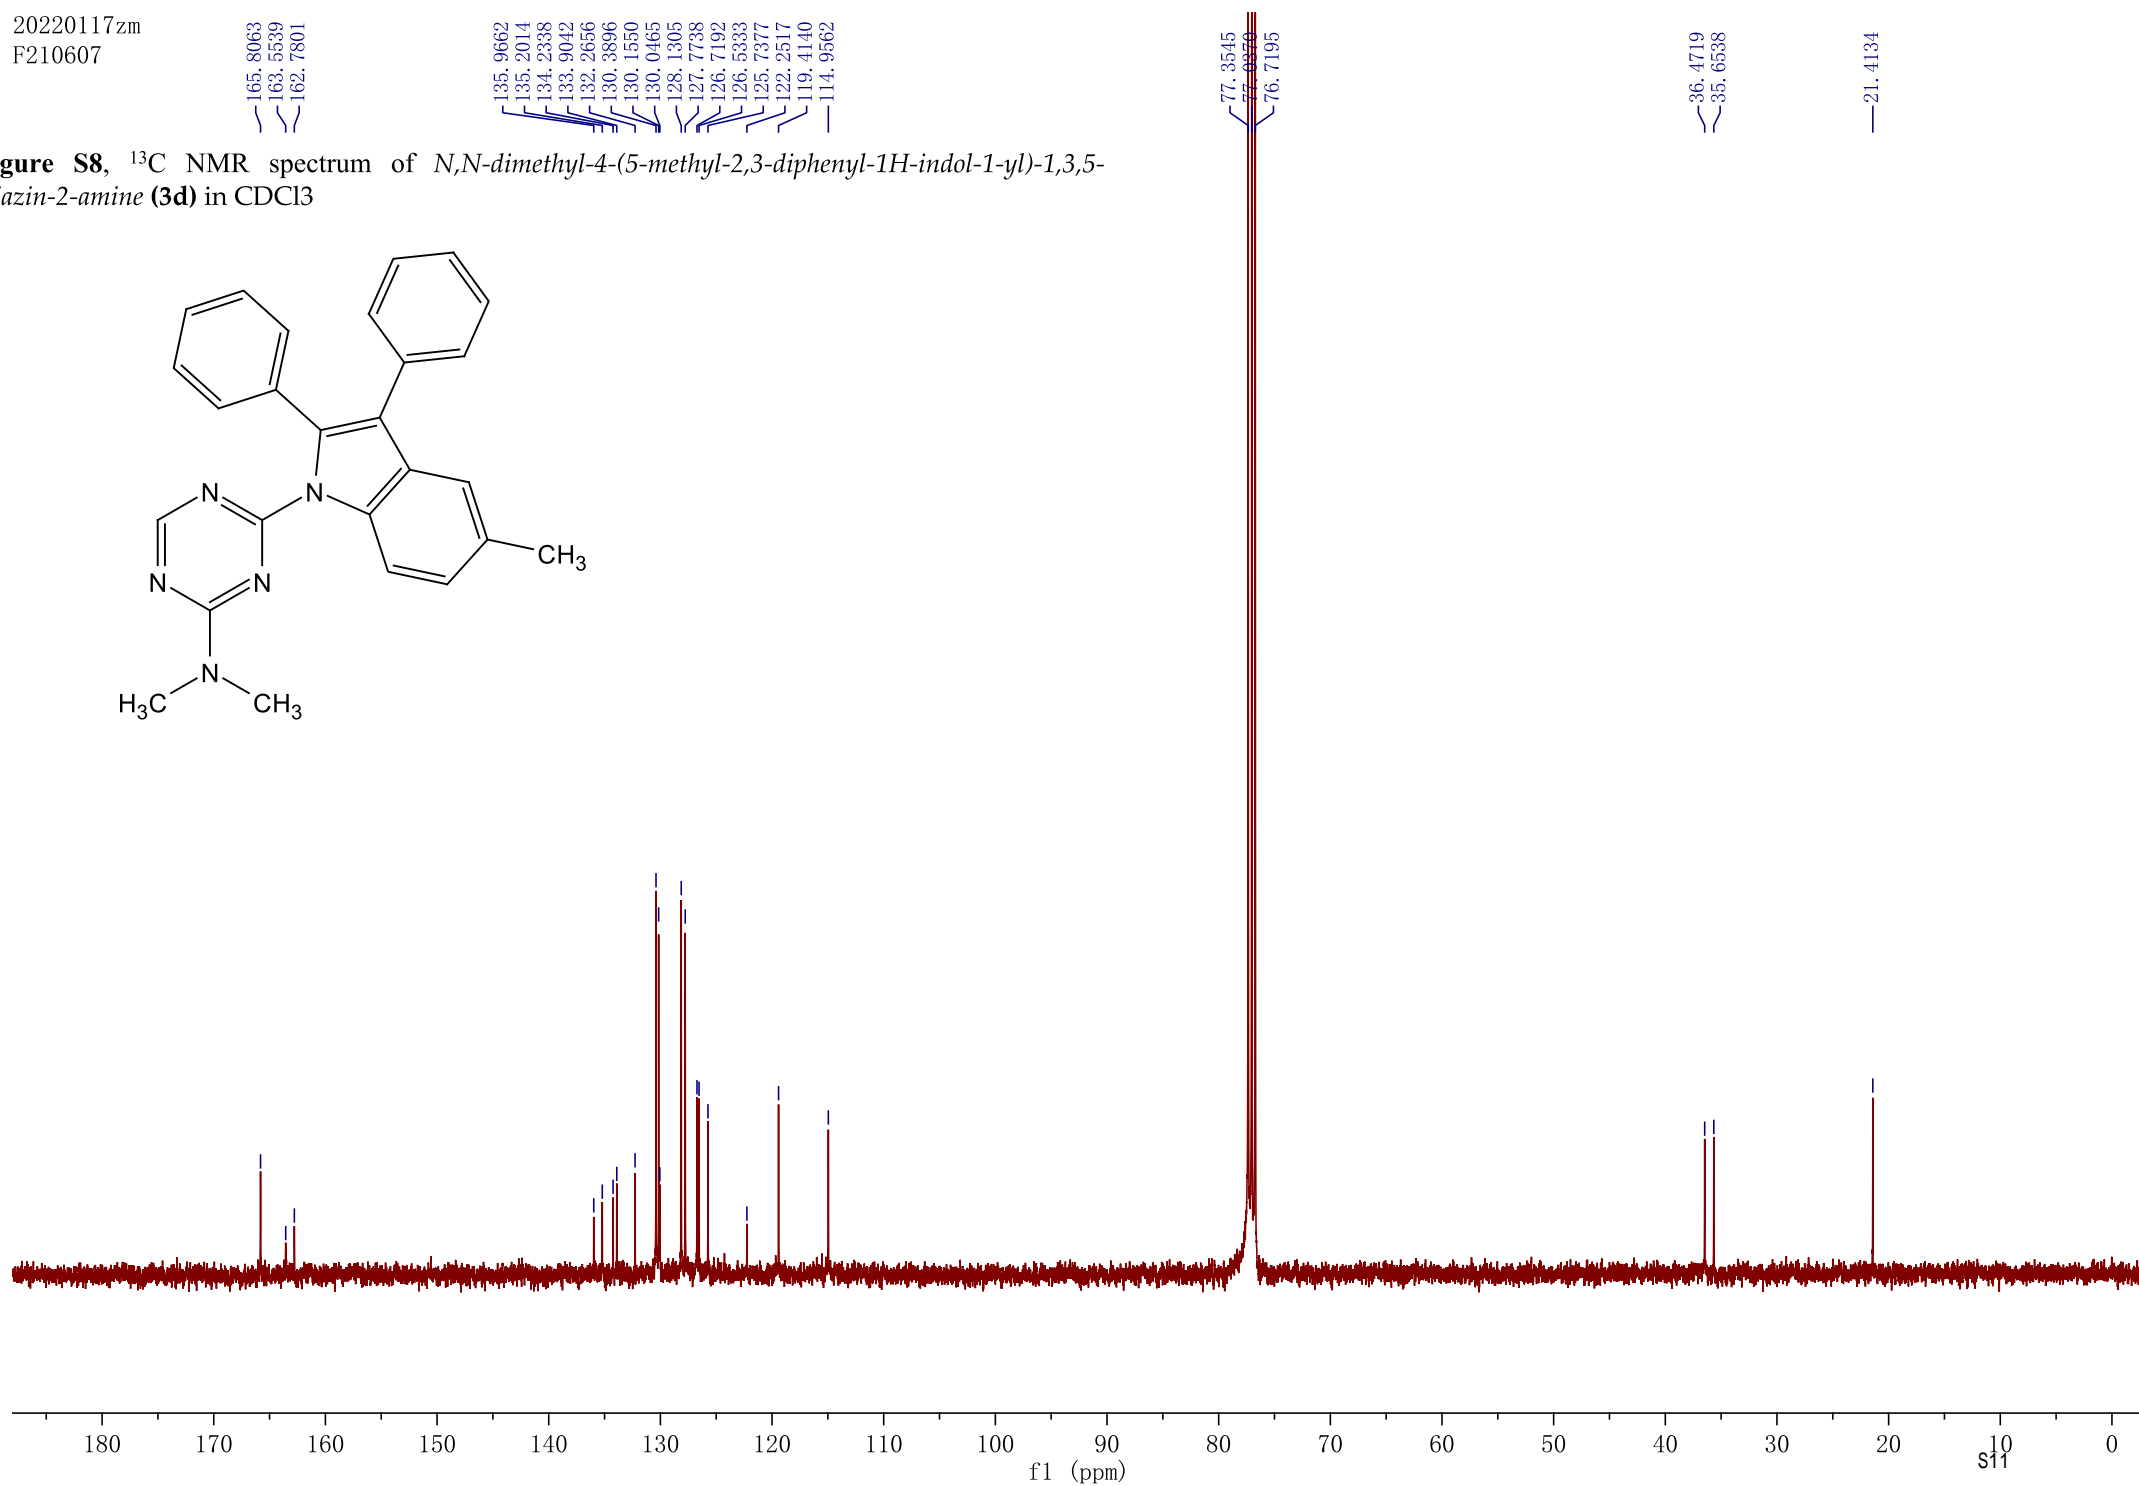

F-20220222  
F20220222

8.5315  
7.3723  
7.3531  
7.3383  
7.3210  
7.3030  
7.2818  
7.2700  
7.2649  
7.2468  
7.2400  
7.2266  
7.2081  
7.1949  
7.1878  
7.1680  
6.8343  
6.8148

3.8361

3.1839

2.8843

**Figure S9**,  $^1\text{H}$  NMR spectrum of 4-(7-methoxy-2,3-diphenyl-1H-indol-1-yl)-*N,N*-dimethyl-1,3,5-triazin-2-amine (**3e**) in  $\text{CDCl}_3$

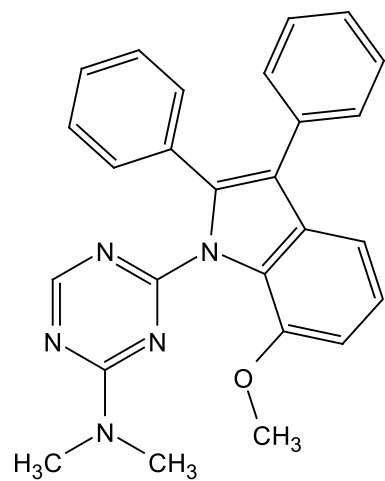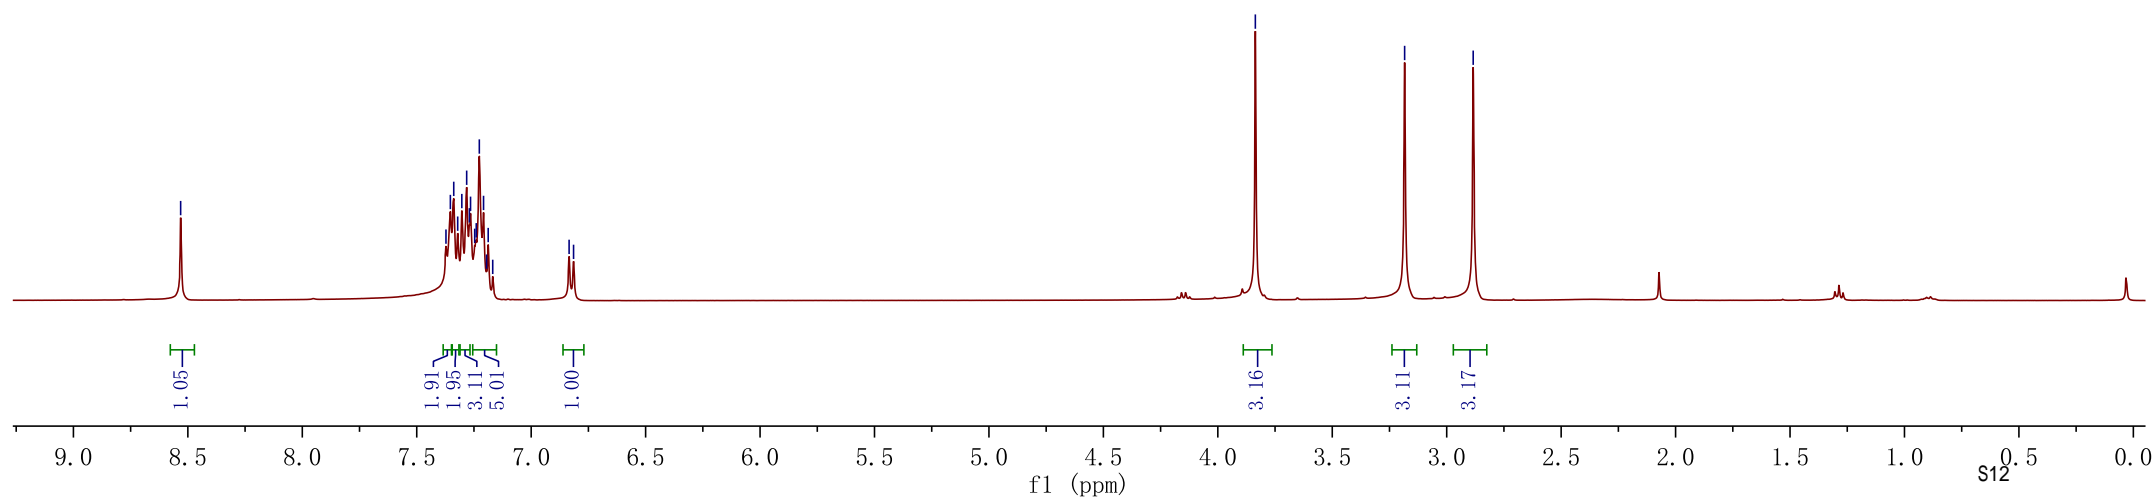



The chemical structure shows a 1H-imidazole ring substituted with a methyl group (H<sub>3</sub>C-N-CH<sub>3</sub>) at the 1-position and a 2-methoxy-5-phenyl-1H-indol-3-yl group at the 4-position. The indole ring has a methoxy group (O-CH<sub>3</sub>) at the 2-position and a phenyl ring at the 5-position.

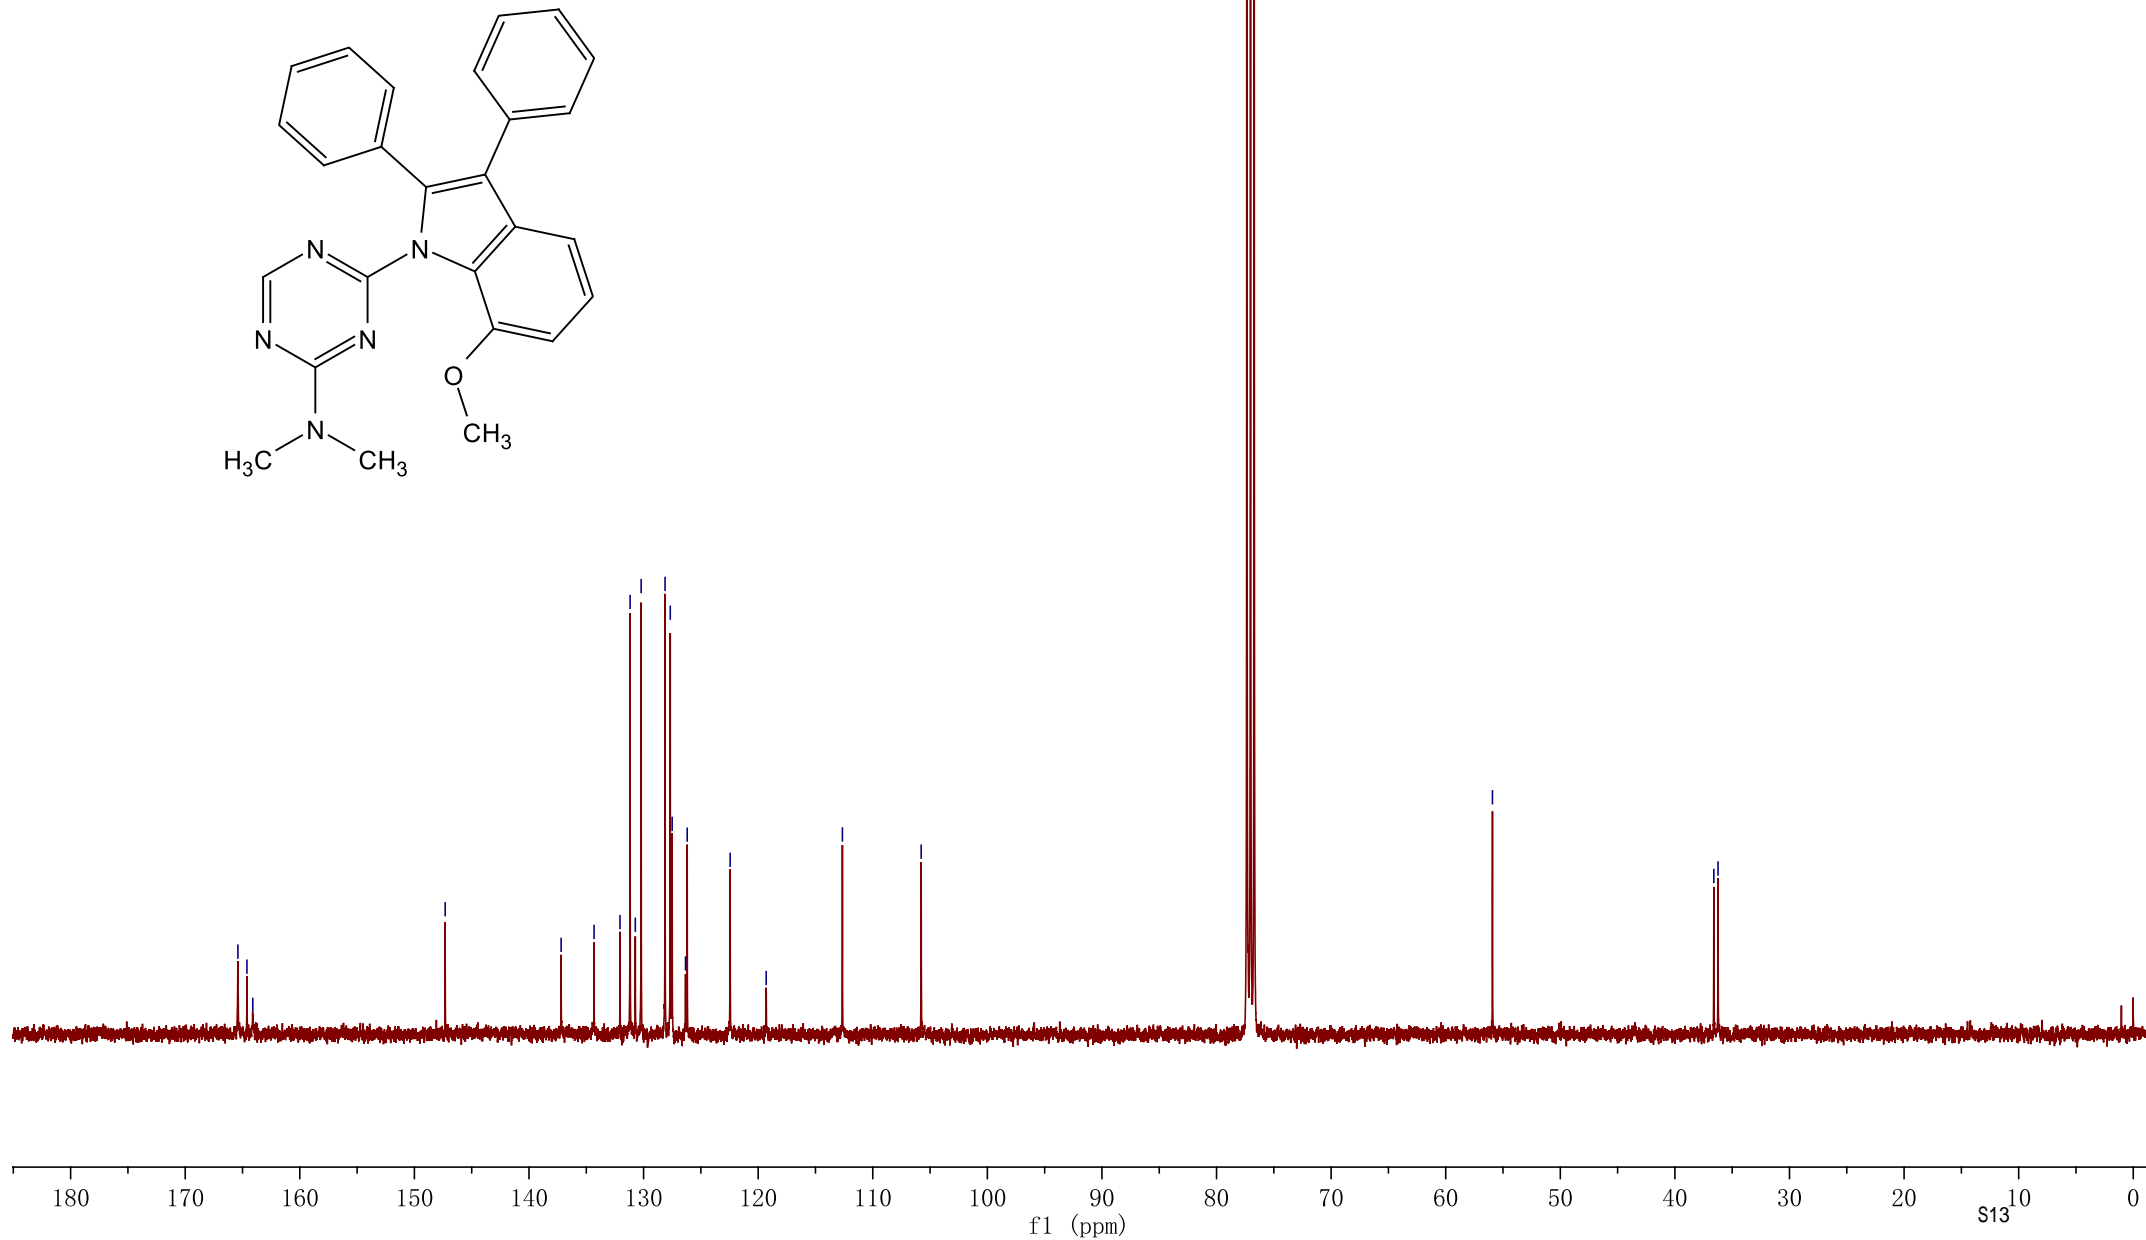

20190419-H1-WHF-327  
20190419-H1-WHF-327  
CDC13

**Figure S11**, <sup>1</sup>H NMR spectrum of 4-(5-methoxy-2,3-diphenyl-1H-indol-1-yl)-N,N-dimethyl-1,3,5-triazin-2-amine (**3f**) in CDCl<sub>3</sub>

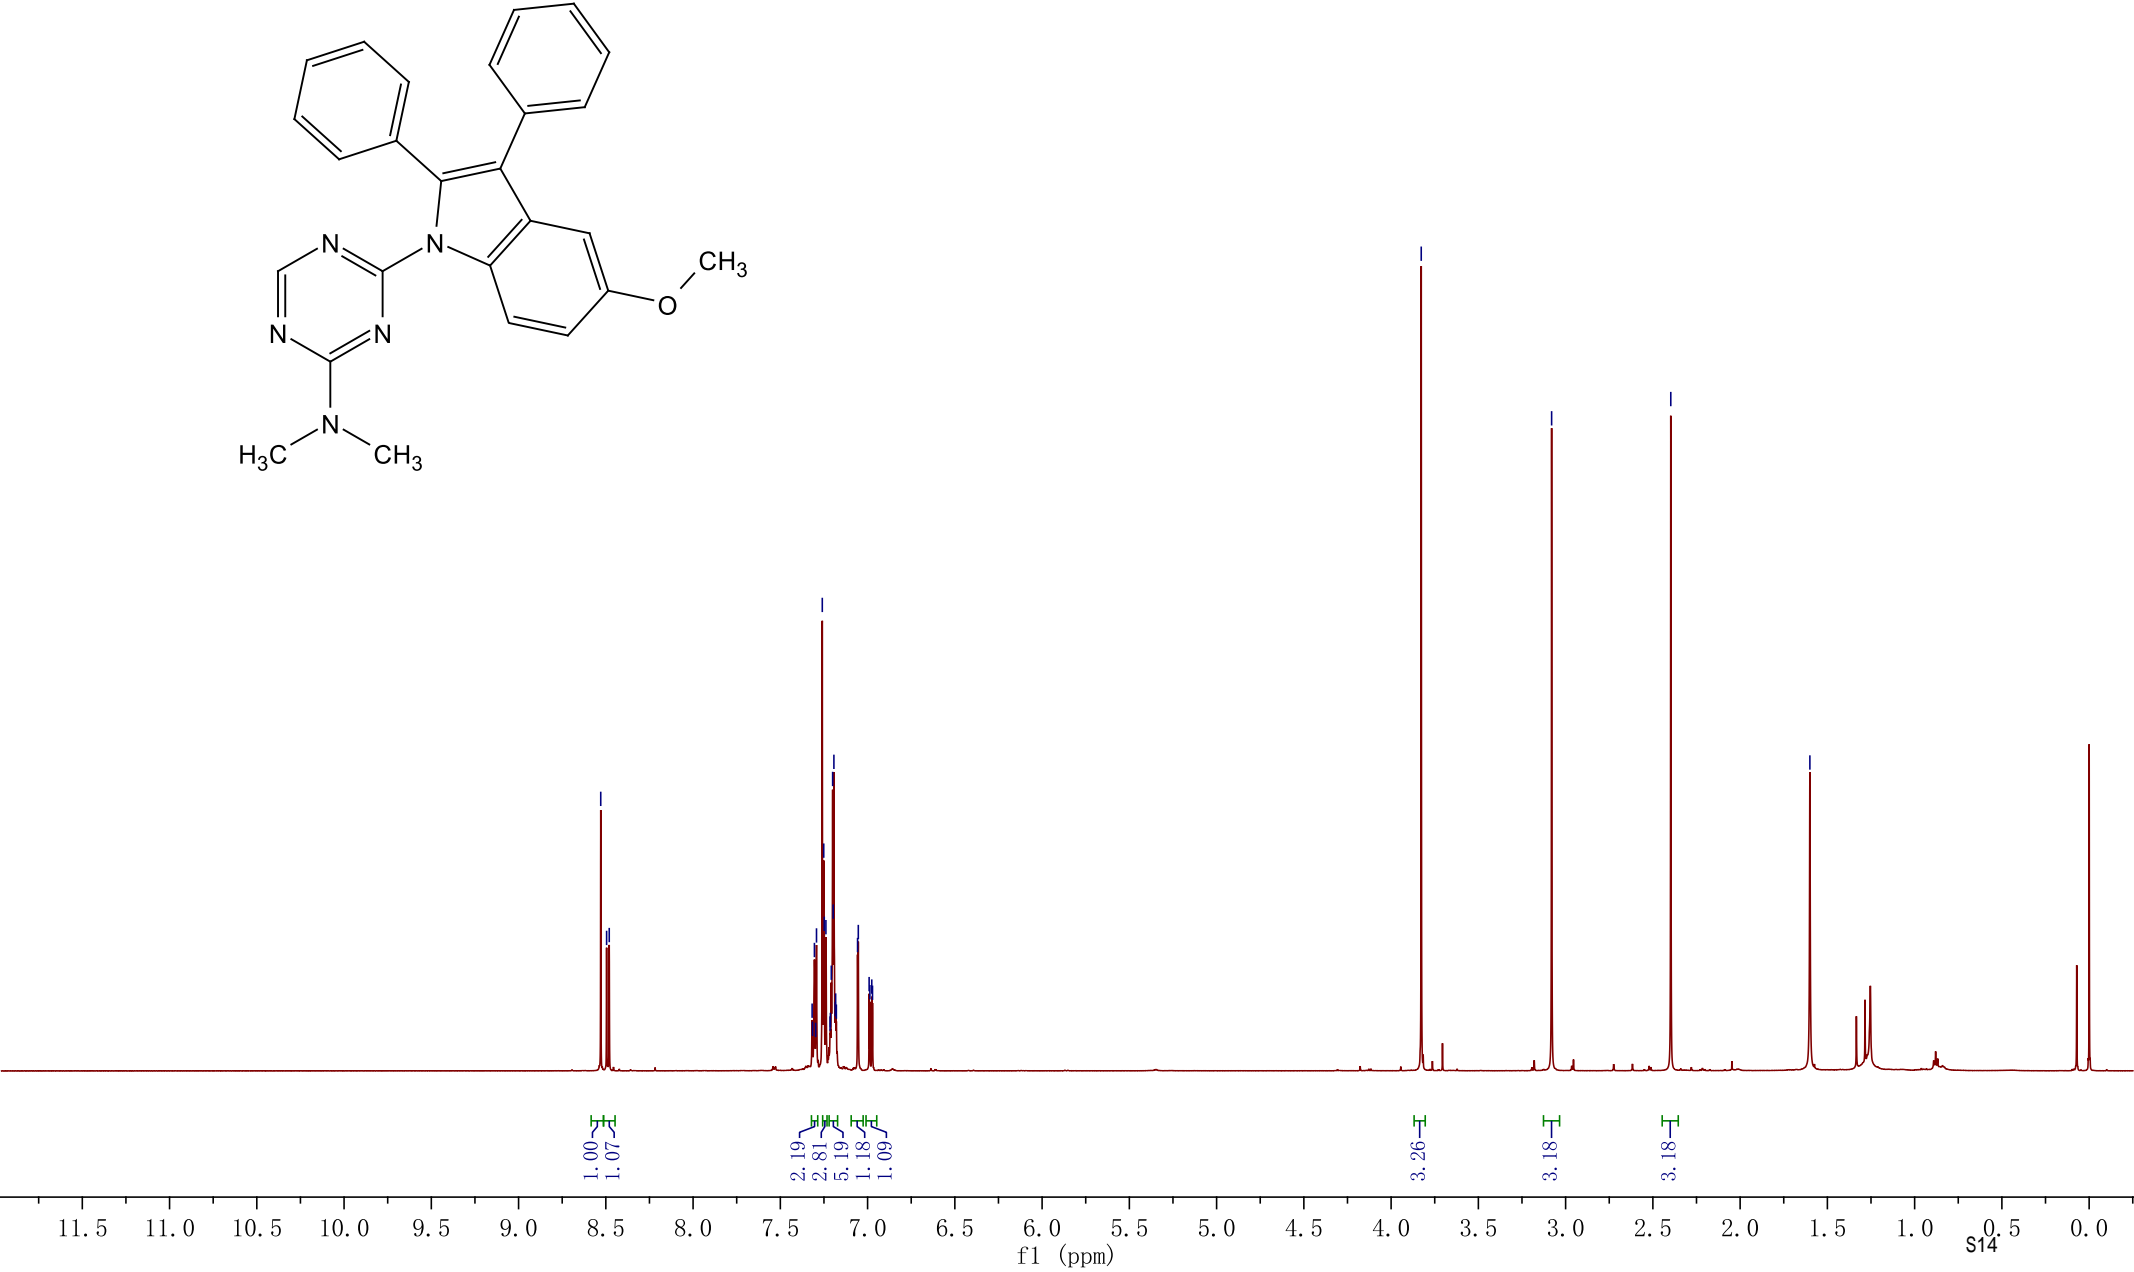

<sup>13</sup>C  
F-1016

166.0213  
163.8460  
162.7520

156.1021

136.6085  
134.2326  
133.8760  
131.7571  
130.5632  
130.2985  
130.1596  
128.1988  
127.7636  
126.7526  
126.5496  
122.2180

116.2150  
113.2545

101.9185

77.3542  
77.0366  
76.7189

55.8064

36.3747  
35.5843

**Figure S12,** <sup>1</sup>H NMR spectrum of 4-(5-methoxy-2,3-diphenyl-1H-indol-1-yl)-N,N-dimethyl-1,3,5-triazin-2-amine (**3f**) in CDCl<sub>3</sub>

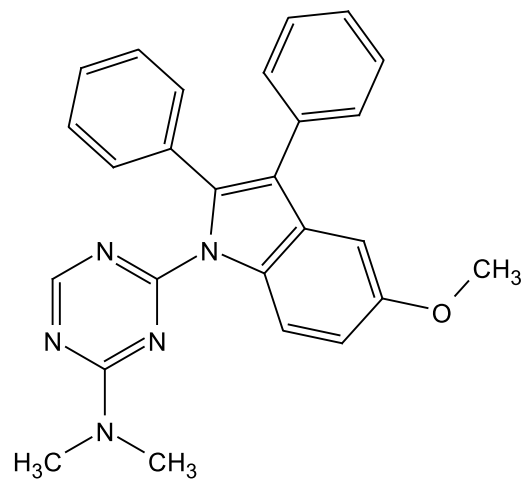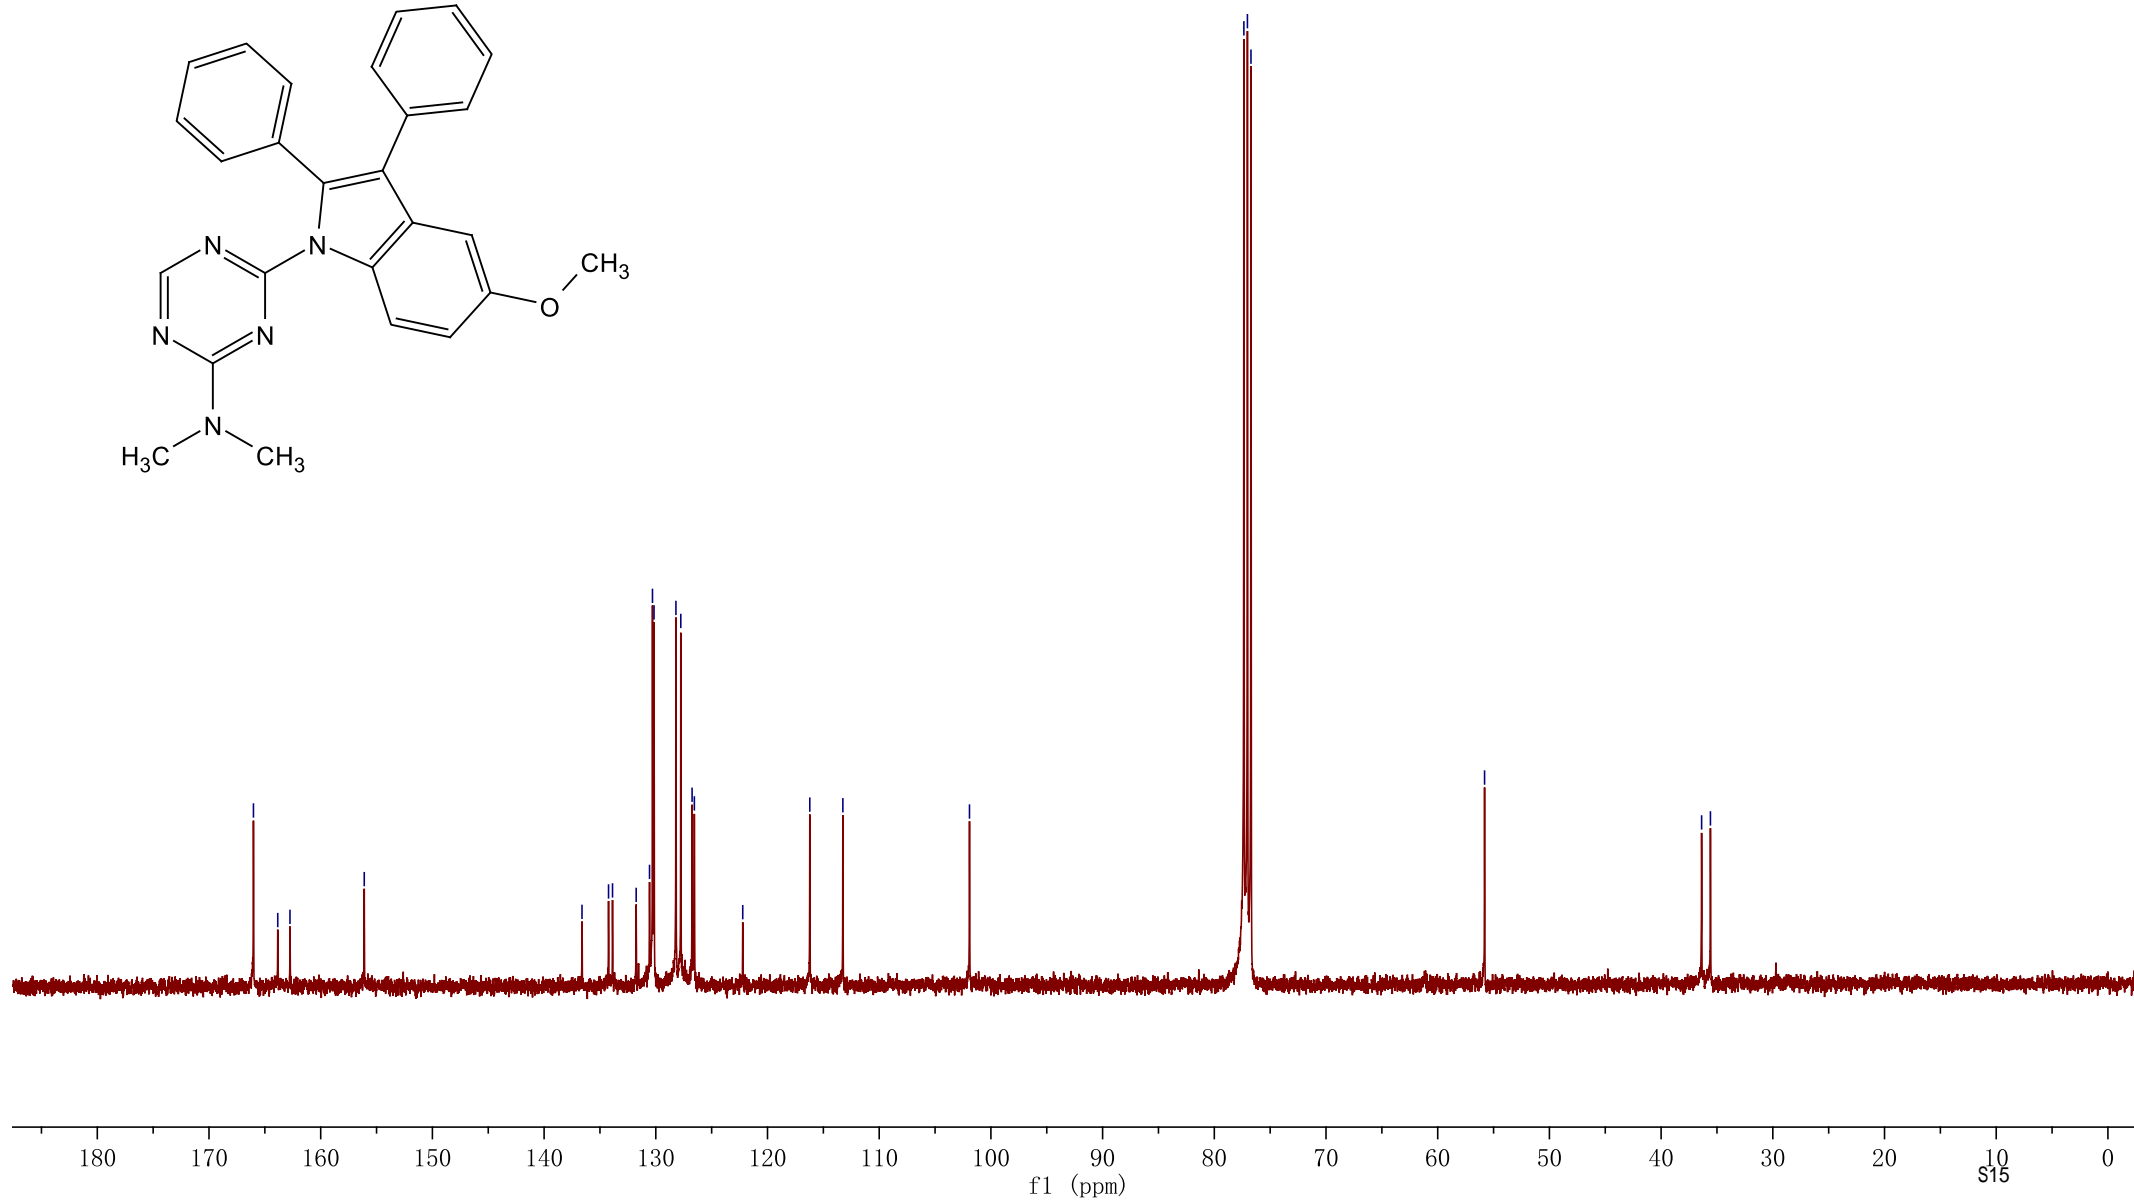

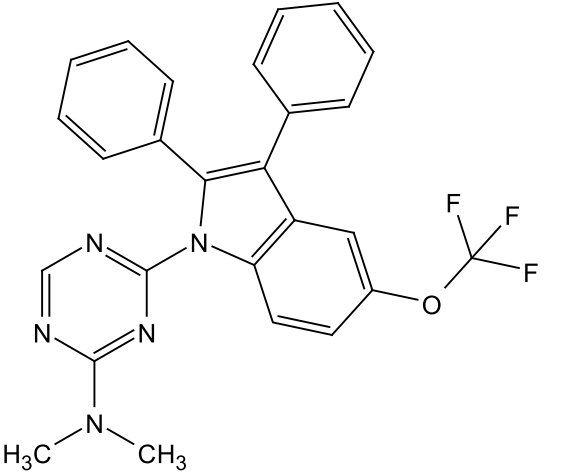

8.6122  
8.5892  
8.5815  
7.4926  
7.3645  
7.3476  
7.3293  
7.3104  
7.2930  
7.2704  
7.2503  
7.2370  
3.1190  
2.4383

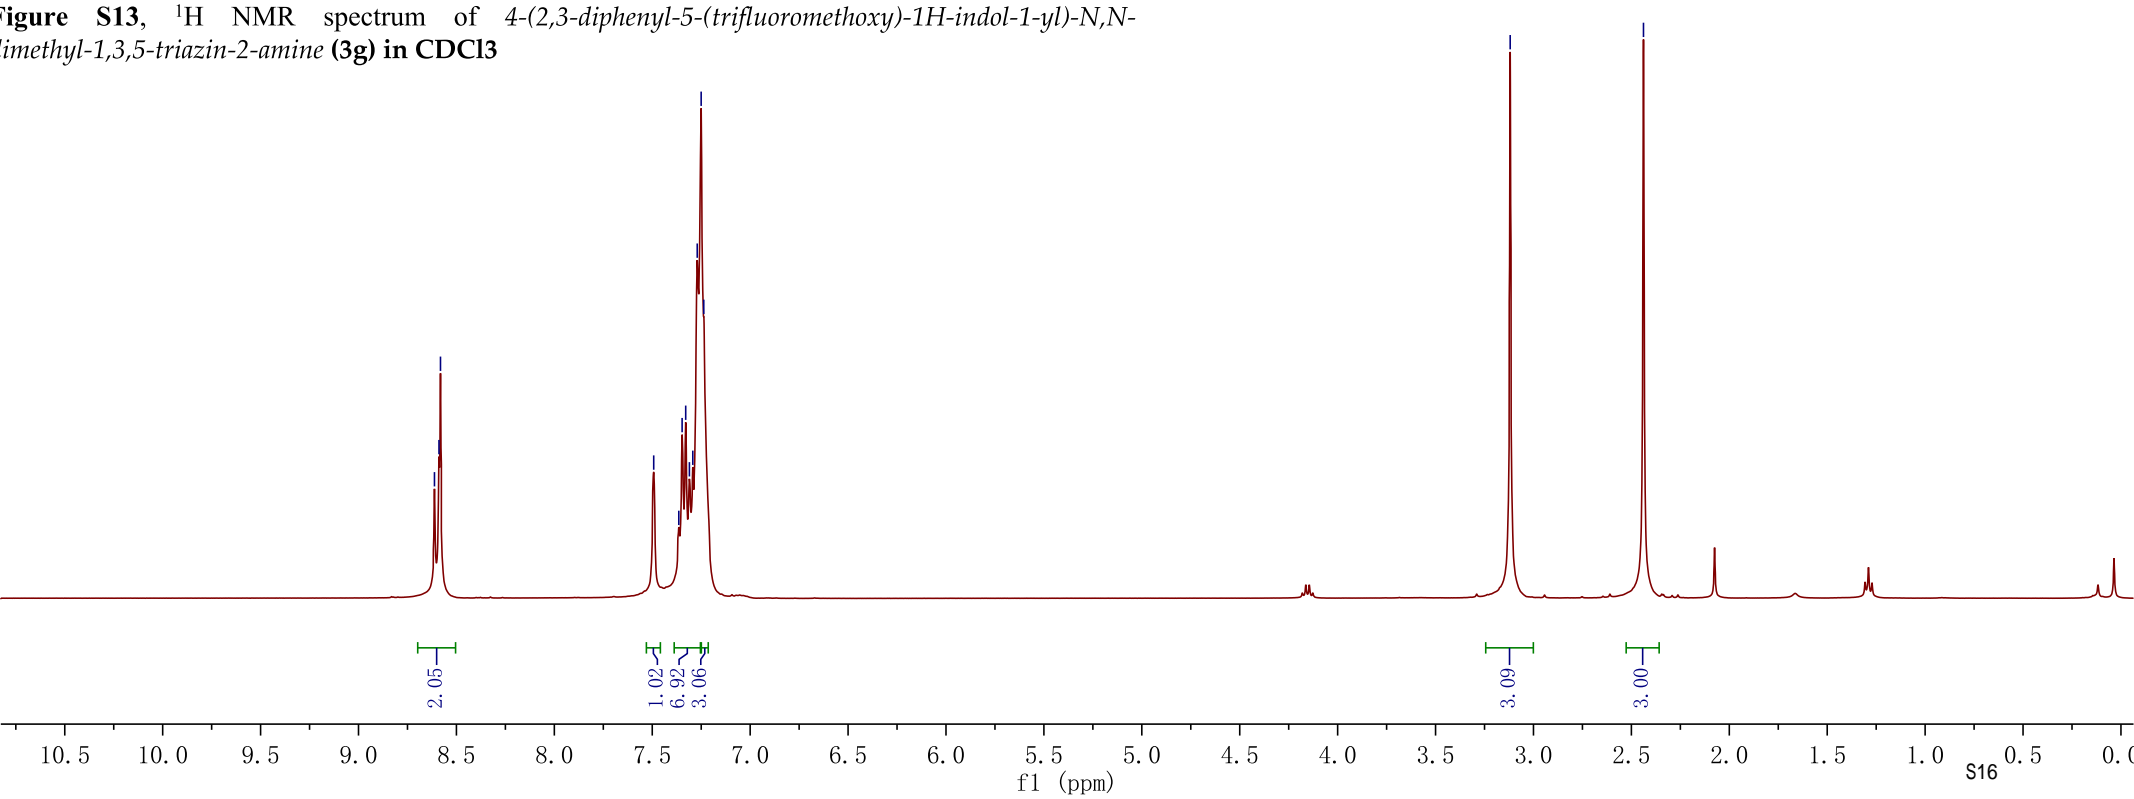

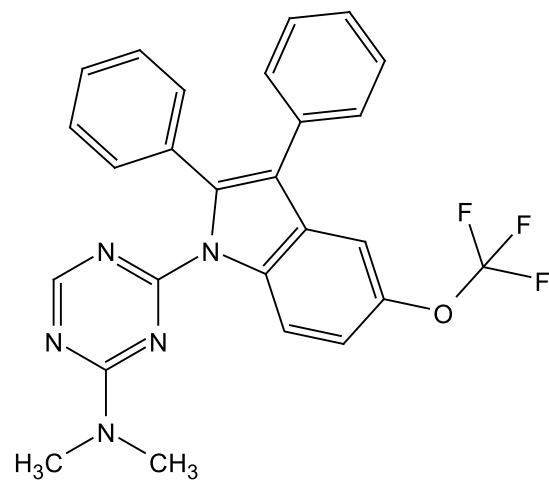

166.3119  
164.0982  
162.7838

145.0577

135.0902

133.6454

133.1274

130.3330

130.1780

130.1431

128.3600

127.9090

127.1335

126.8763

121.7418

117.6072

116.0669

112.0195

77.3659  
77.0483  
76.7307

36.3607  
35.6037

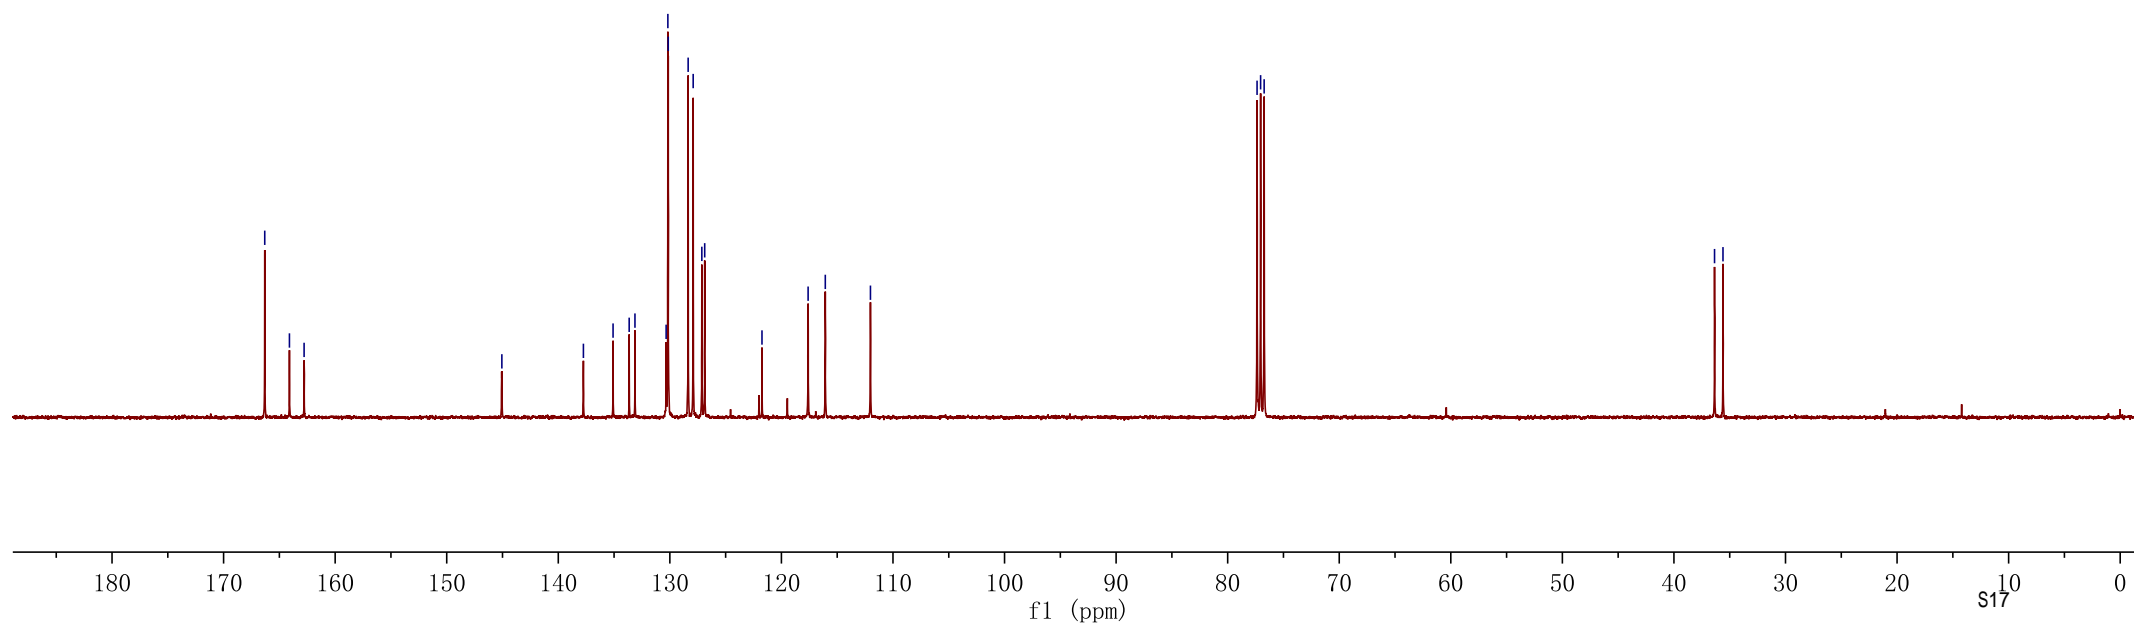

LFY211015  
F-1015

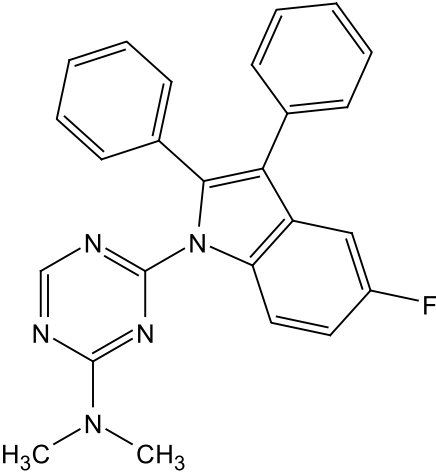

8.5713  
8.5638  
8.5519  
8.5408  
8.5292  
7.3505  
7.3464  
7.3426  
7.3297  
7.3258  
7.3110  
7.3003  
7.2965  
7.2921  
7.2882  
7.2807  
7.2767  
7.2579  
7.2541  
7.2382  
7.2290  
7.2204  
7.2090  
7.2036  
7.1258  
7.1192  
7.1031  
7.0966  
7.0805  
7.0739

3.1104  
2.4173

**Figure S15,** <sup>1</sup>H NMR spectrum of 4-(5-fluoro-2,3-diphenyl-1H-indol-1-yl)-*N,N*-dimethyl-1,3,5-triazin-2-amine (**3h**) in CDCl<sub>3</sub>

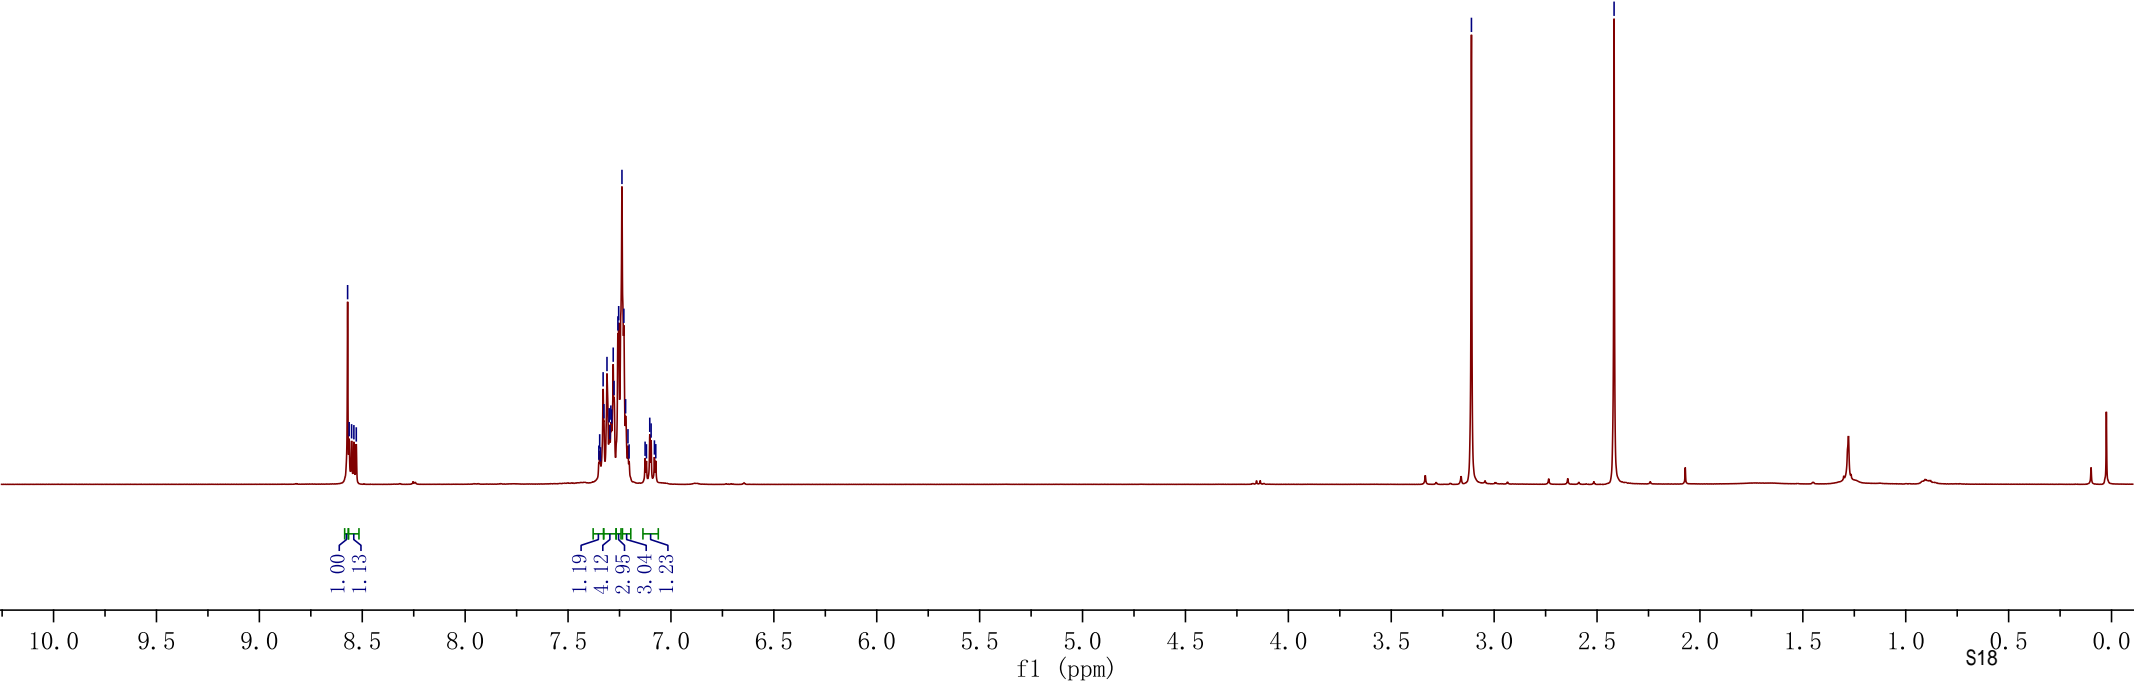

<sup>13</sup>C  
F-1015

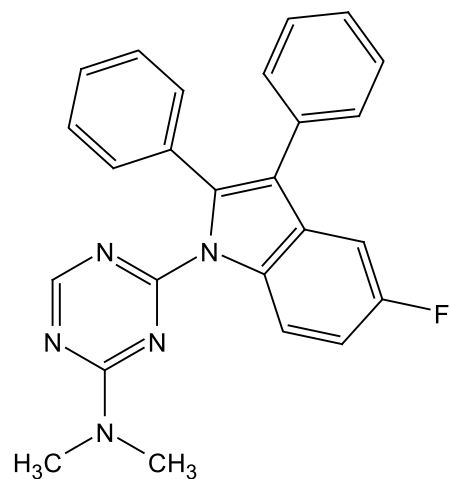

166.2402  
164.0398  
162.7905  
160.6960  
158.3260

137.4745  
133.8616  
133.3819  
133.2548  
130.6736  
130.5785  
130.1705  
130.1243  
128.2763

127.8639  
127.0009  
126.7548  
121.8803  
121.8405

116.2823  
116.1943  
112.1094  
111.8614

105.0377  
104.7973

77.3619  
77.0444  
76.7267

36.3619  
35.5868

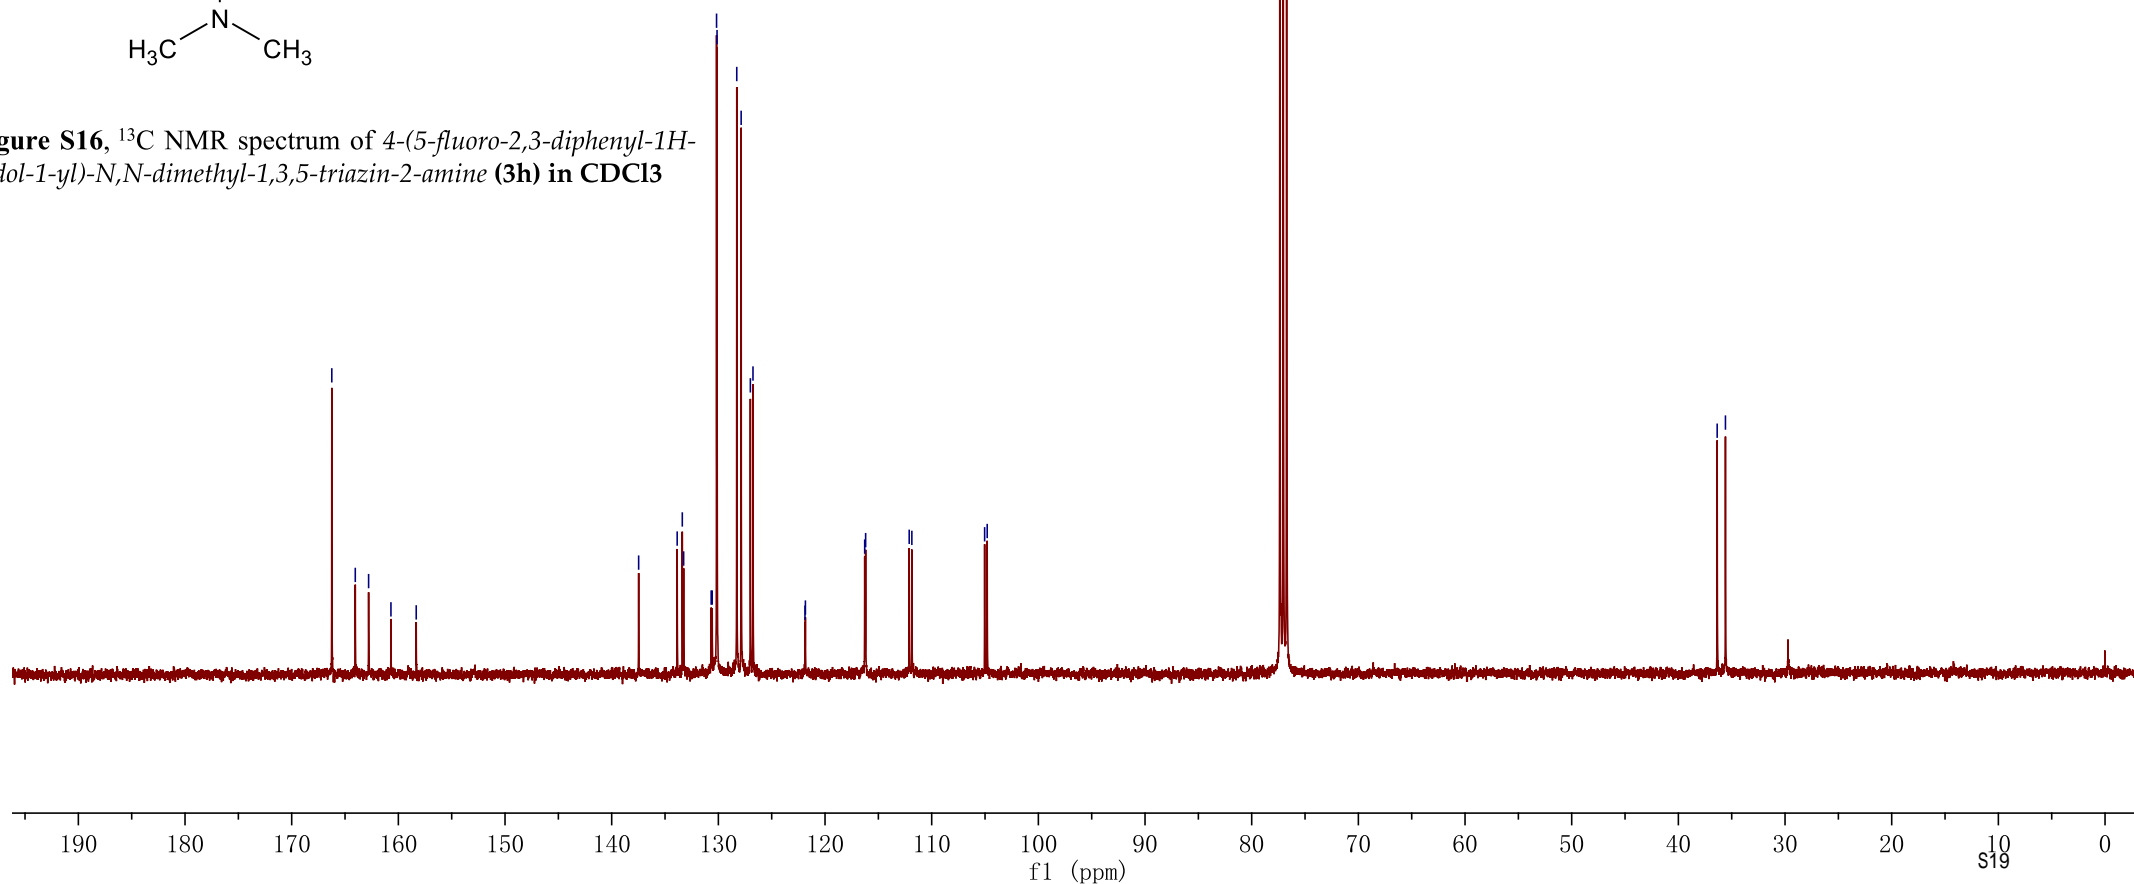

<sup>1</sup>H  
F-1017

7.3535  
7.3371  
7.3335  
7.3171  
7.3115  
7.3010  
7.2976  
7.2818  
7.2559  
7.2396  
7.2241  
7.2158  
7.2074

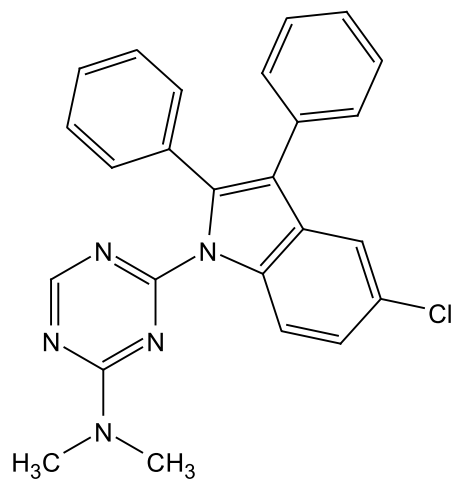

**Figure S17,** <sup>1</sup>H NMR spectrum of 4-(5-chloro-2,3-diphenyl-1H-indol-1-yl)-N,N-dimethyl-1,3,5-triazin-2-amine (**3i**) in CDCl<sub>3</sub>

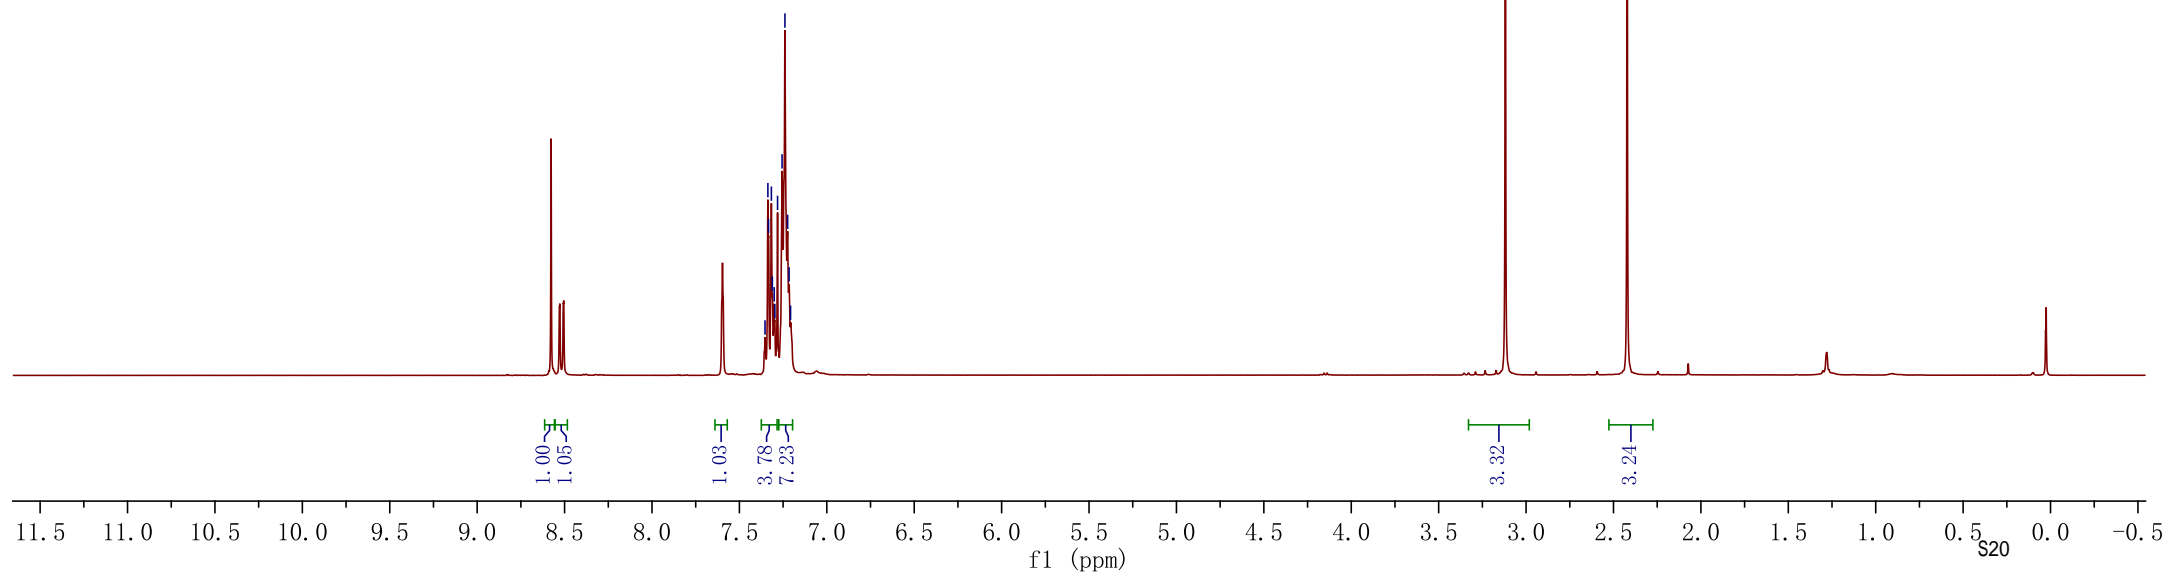



<sup>13</sup>C  
F-1017

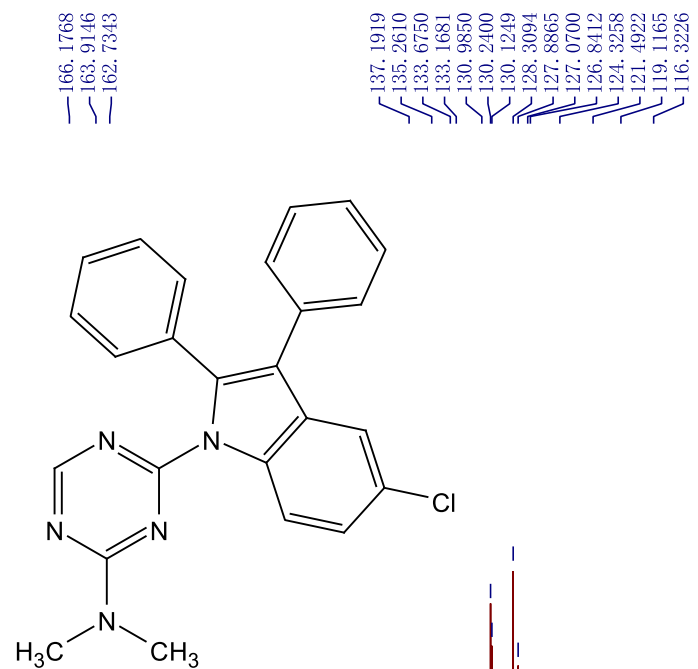

**Figure S18,** <sup>13</sup>C NMR spectrum of 4-(5-chloro-2,3-diphenyl-1H-indol-1-yl)-N,N-dimethyl-1,3,5-triazin-2-amine (**3i**) in CDCl<sub>3</sub>

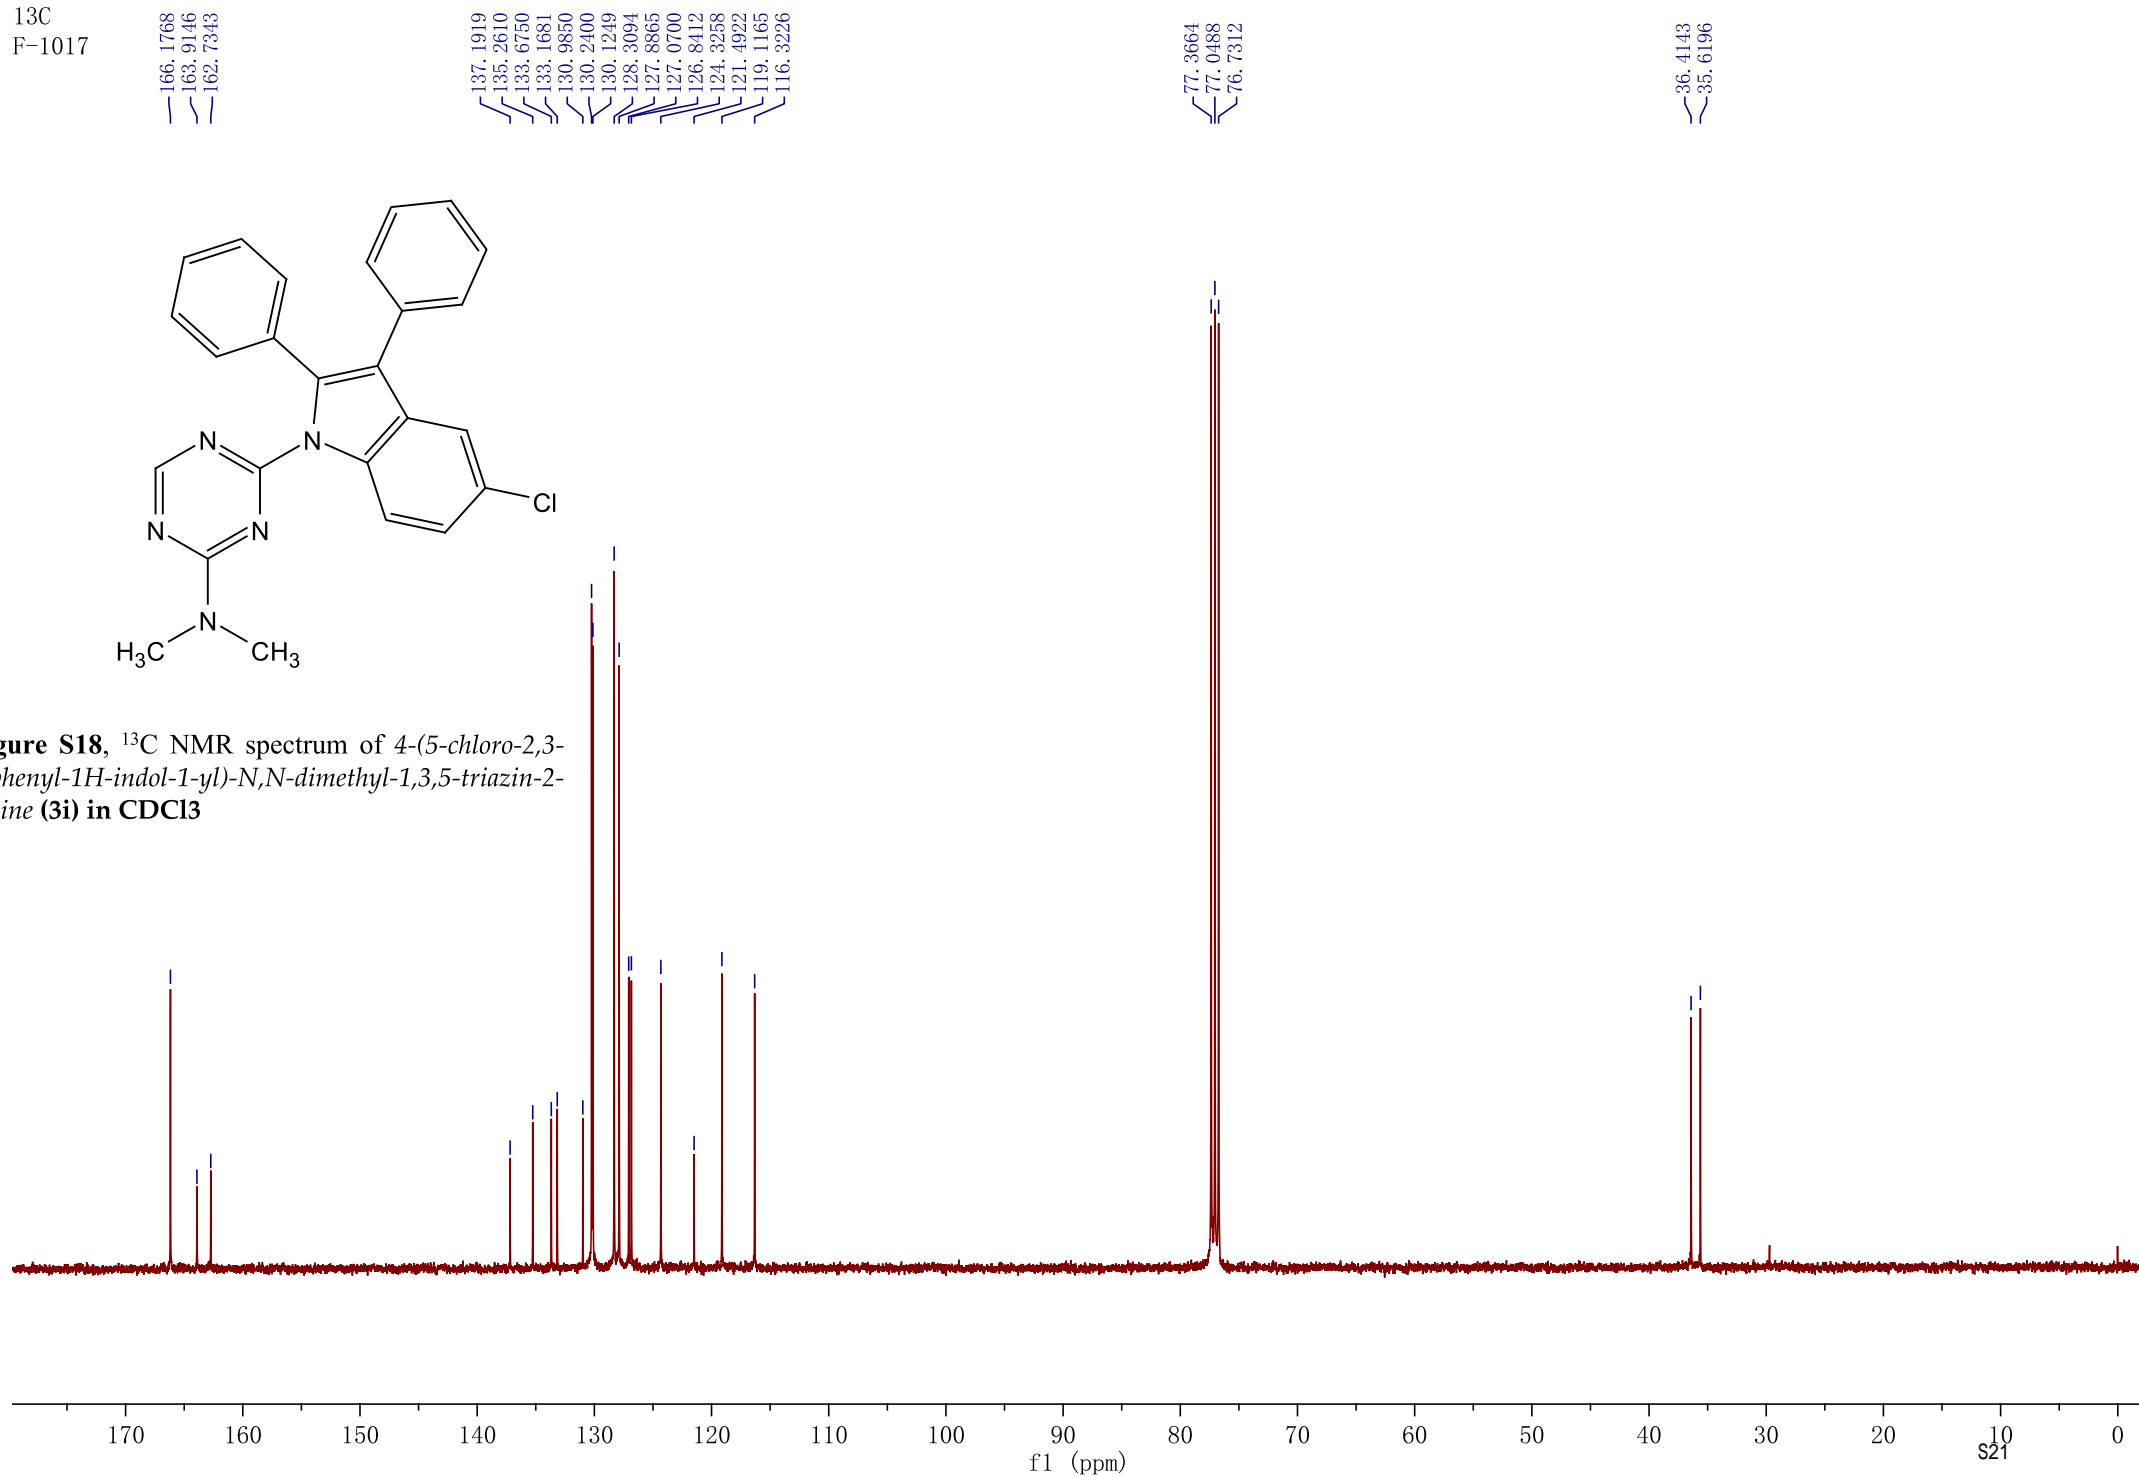

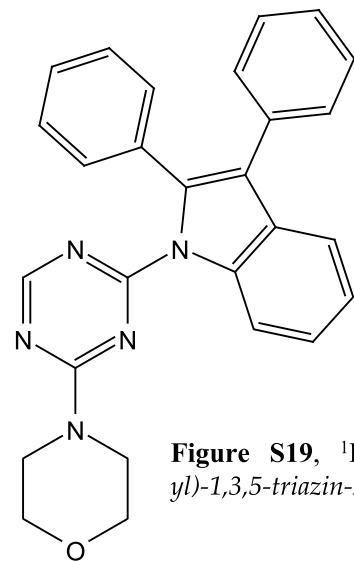

**Figure S19,** <sup>1</sup>H NMR spectrum of 4-(4-(2,3-diphenyl-1H-indol-1-yl)-1,3,5-triazin-2-yl)morpholine (**3j**) in CDCl<sub>3</sub>

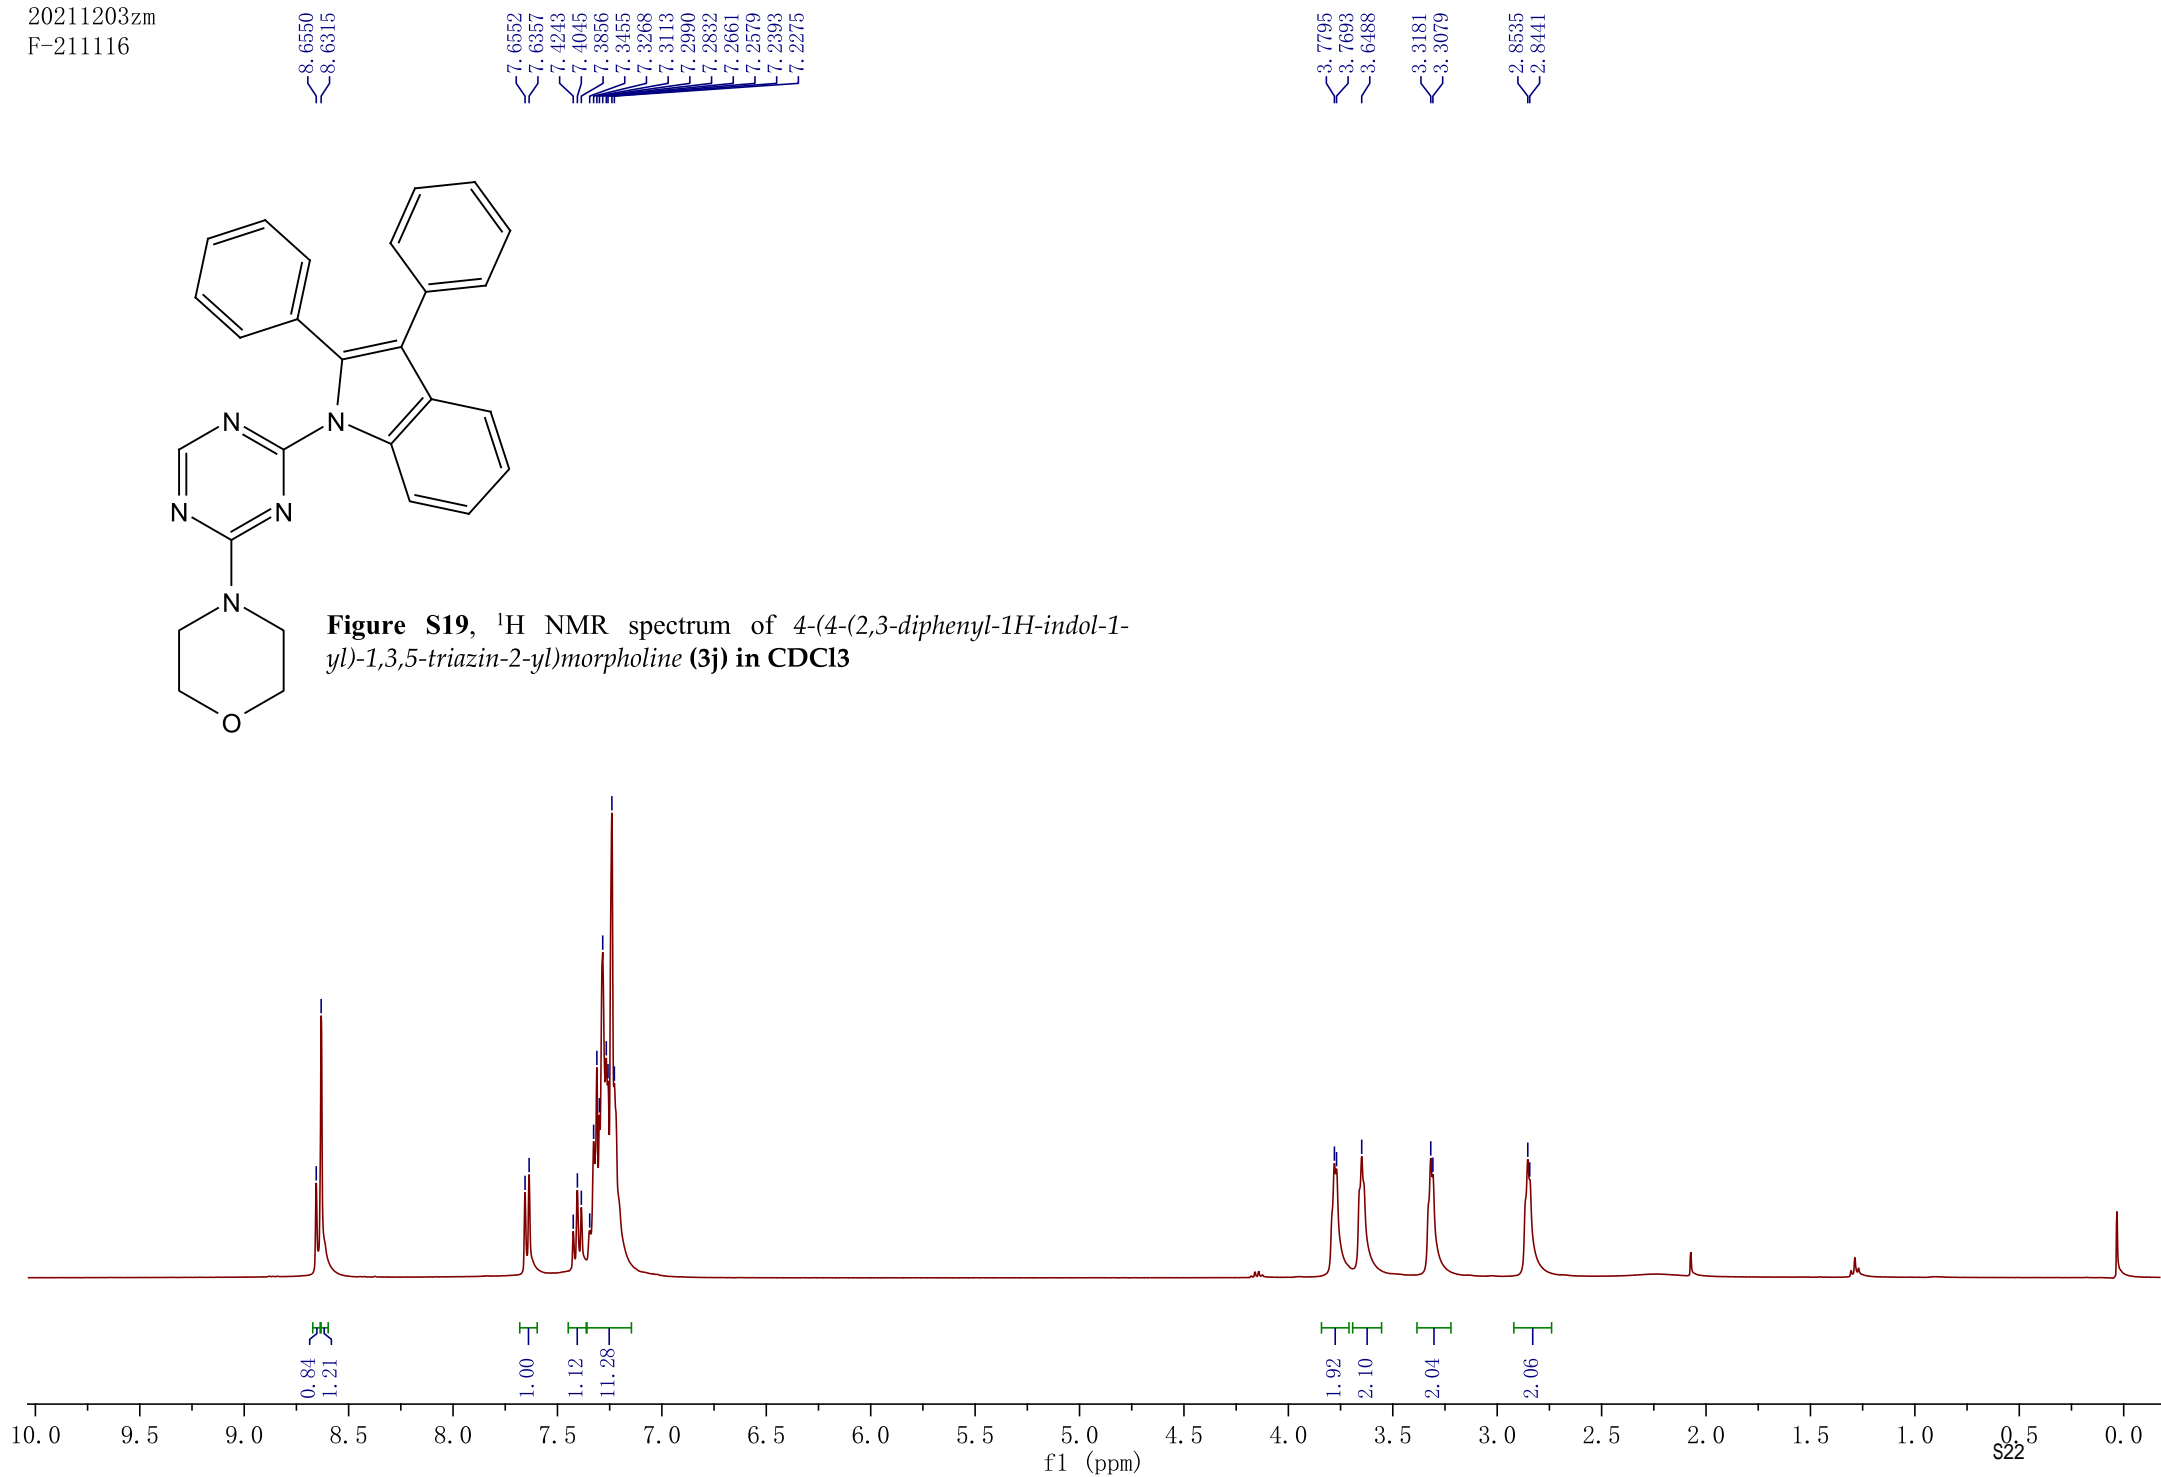

20211208zm  
f2111116

166.3939  
163.0566  
162.9570  
136.9068  
135.7344  
134.3674  
133.5844  
130.3428  
130.1969  
129.8748  
128.1776  
127.8280  
126.7536  
126.6792  
124.5148  
122.9354  
122.7516  
119.7056  
115.4352

77.3593  
77.2450  
77.0417  
76.7241  
66.5612  
66.4730  
43.7372  
42.8995

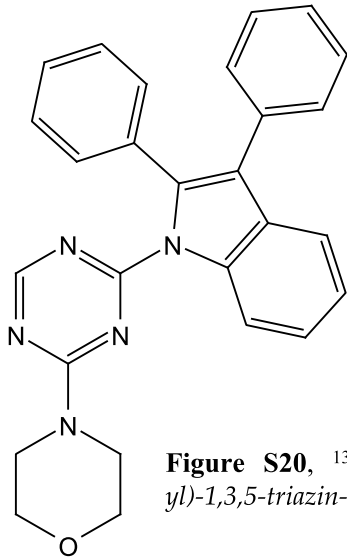

**Figure S20,** <sup>13</sup>C NMR spectrum of 4-(4-(2,3-diphenyl-1H-indol-1-yl)-1,3,5-triazin-2-yl)morpholine (**3j**) in CDCl<sub>3</sub>

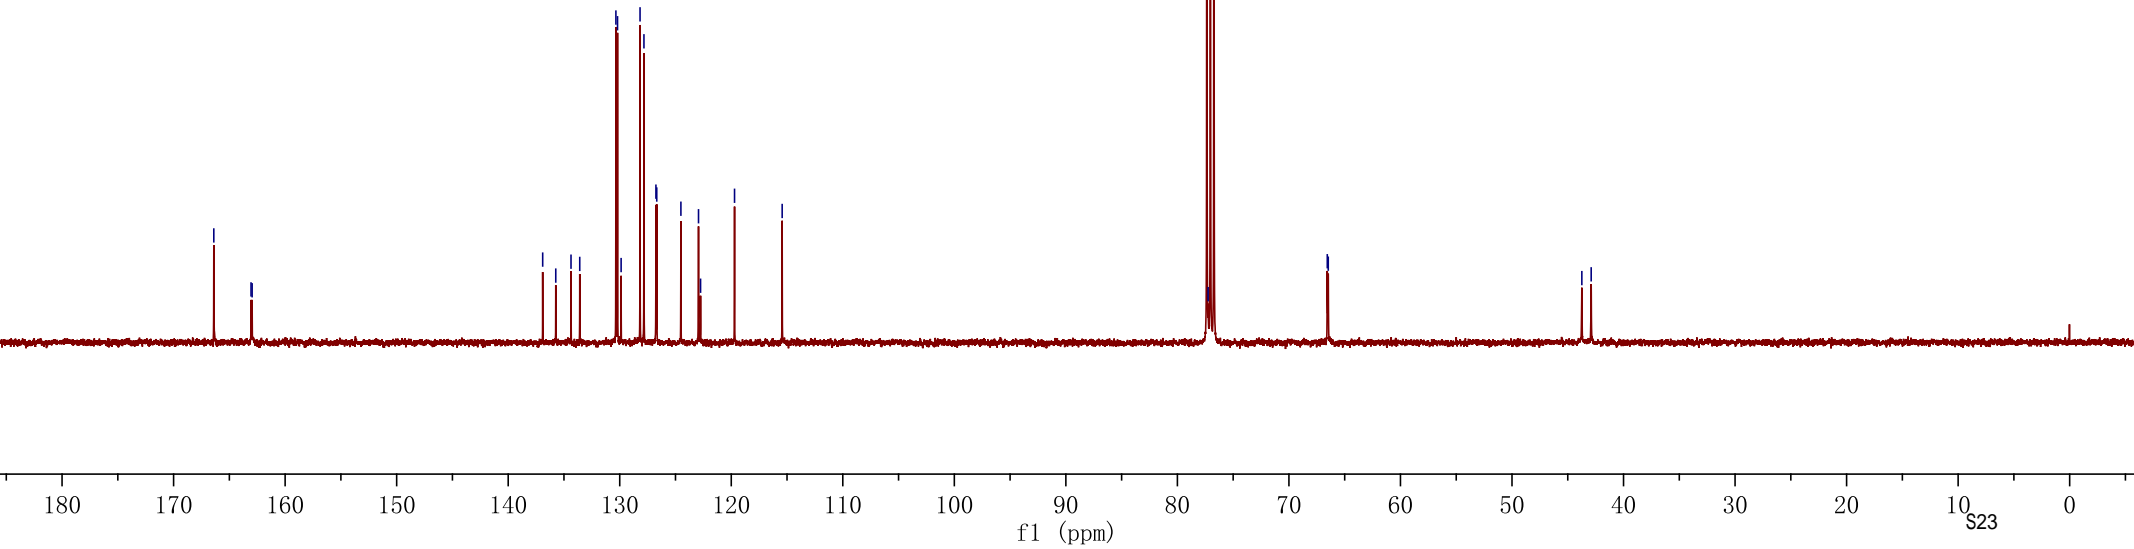

20211203zm  
1118

8.6400  
8.6191  
8.6011

7.6529  
7.6338  
7.4151  
7.4120  
7.3971  
7.3942  
7.3913  
7.3763  
7.3732  
7.3459  
7.3427  
7.3383  
7.3359  
7.3247  
7.3212  
7.3145  
7.3071  
7.2881  
7.2807  
7.2740  
7.2701  
7.2574  
7.2537  
7.2451  
7.2402  
7.2318  
7.2301  
7.2246  
7.2224

3.8142  
3.8029  
3.7908

2.9192  
2.9072  
2.8946

2.3899  
2.3777  
2.3655  
2.2857  
2.0698  
2.0564  
2.0442

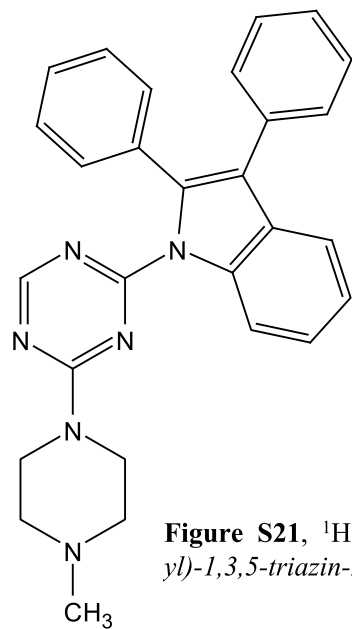

**Figure S21,** <sup>1</sup>H NMR spectrum of 1-(4-(4-methylpiperazin-1-yl)-1,3,5-triazin-2-yl)-2,3-diphenyl-1H-indole (**3k**) in CDCl<sub>3</sub>

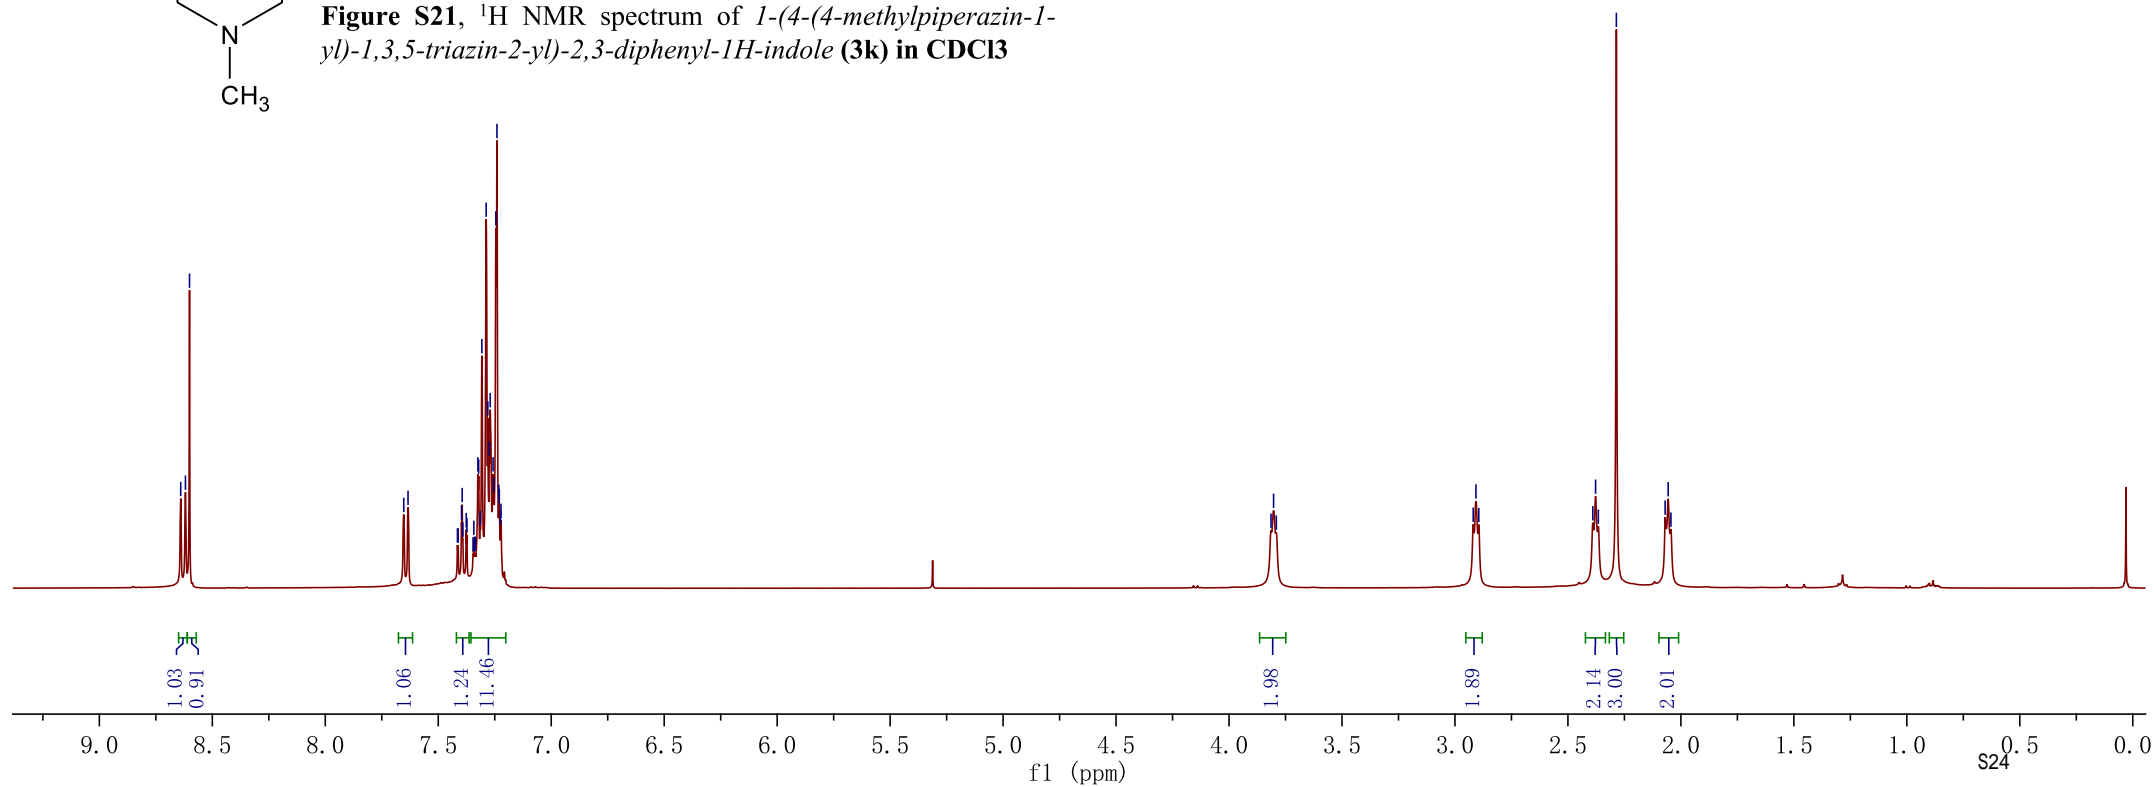

166.5801  
163.1975  
163.1454  
136.9187  
135.8370  
134.2987  
133.7254  
130.3664  
130.1923  
129.8109  
128.1522  
127.8107  
126.7819  
126.5986  
124.3845  
122.7779  
122.4091  
119.6369  
115.3383  
77.3690  
77.2546  
77.0515  
76.7338  
54.6191  
54.5432  
46.0174  
43.0515  
42.3092

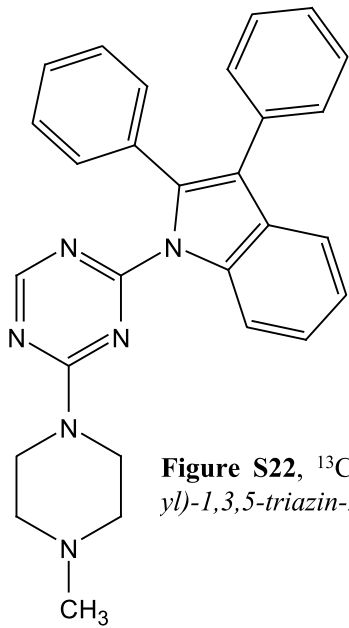

**Figure S22**, <sup>13</sup>C NMR spectrum of *1-(4-(4-methylpiperazin-1-yl)-1,3,5-triazin-2-yl)-2,3-diphenyl-1H-indole (3k)* in CDCl<sub>3</sub>

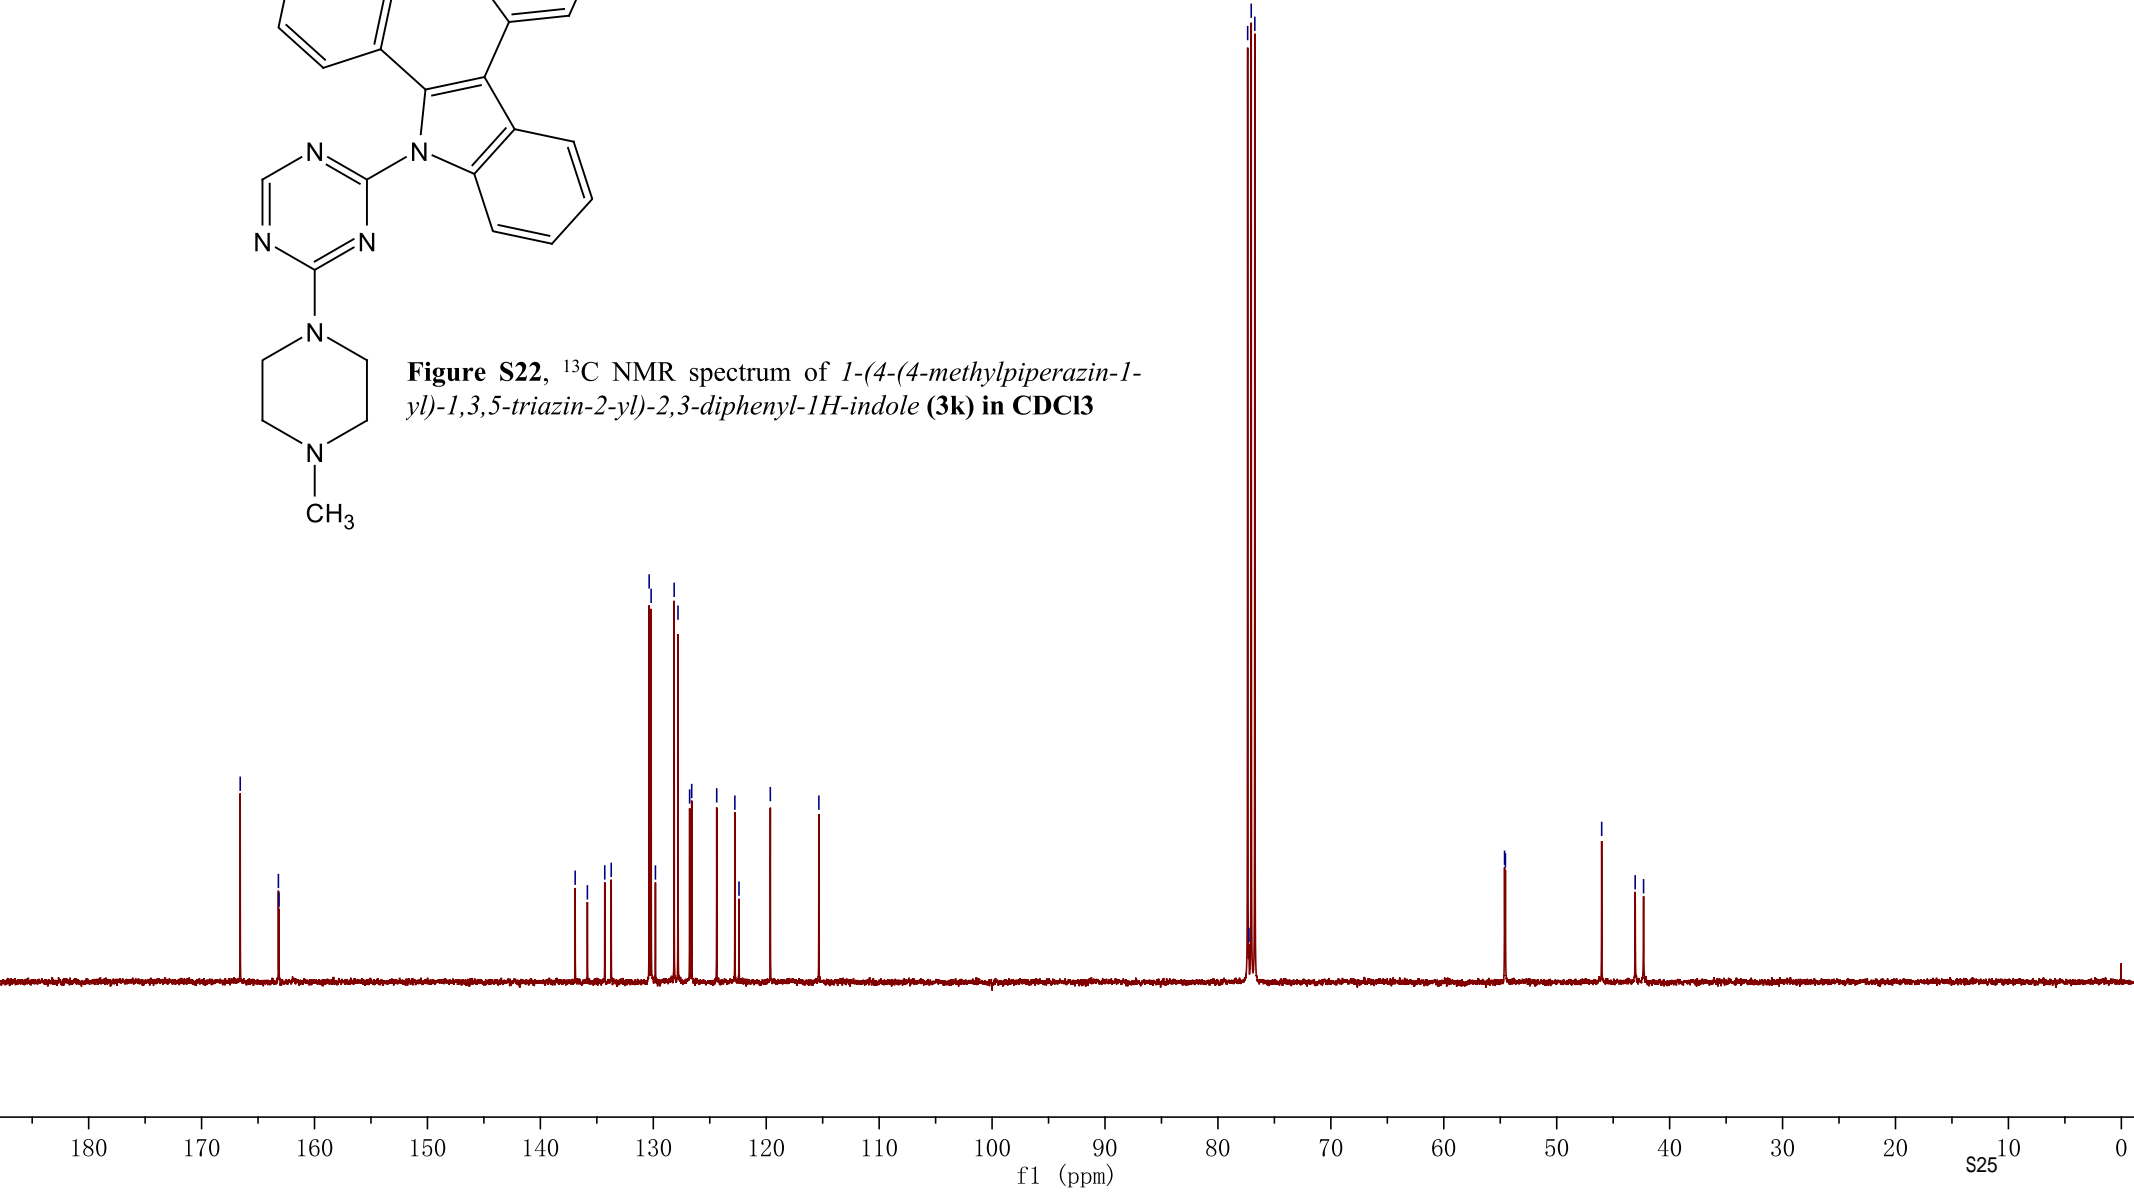

20211223zm  
f211204

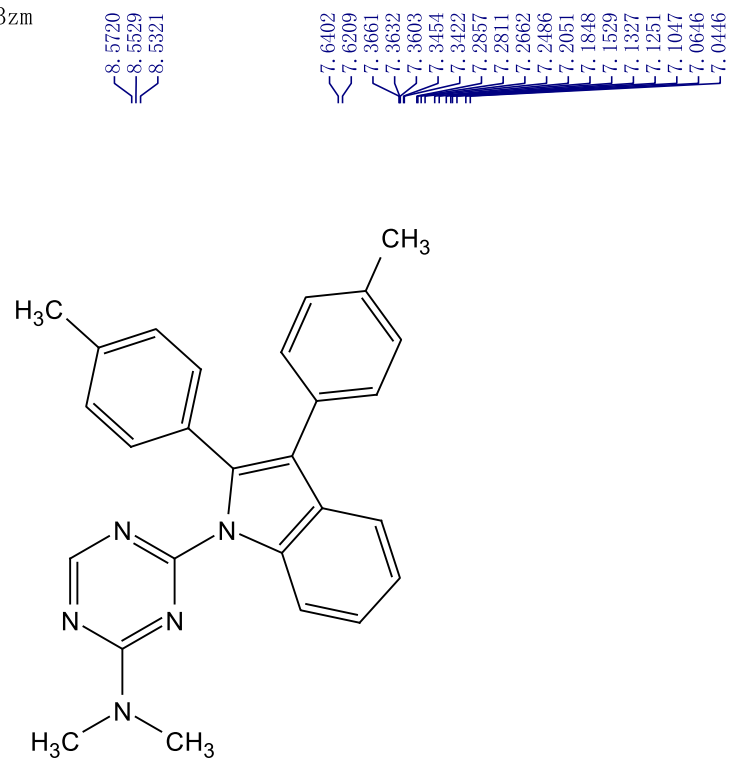

**Figure S23**,  $^1\text{H}$  NMR spectrum of 4-(2,3-di-p-tolyl-1H-indol-1-yl)-N,N-dimethyl-1,3,5-triazin-2-amine (**3m**) in  $\text{CDCl}_3$

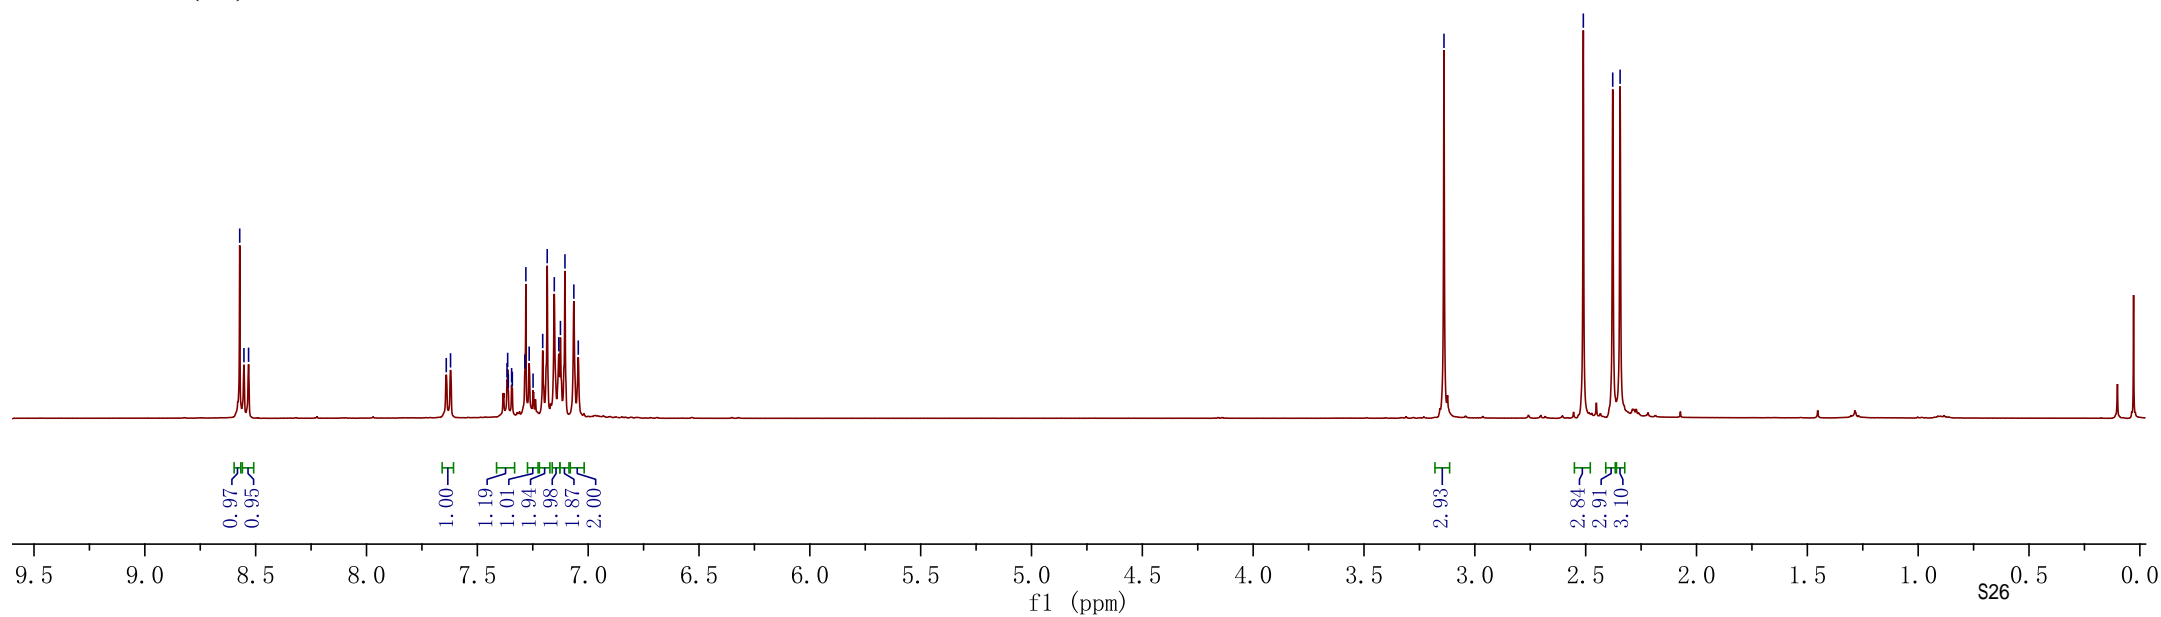

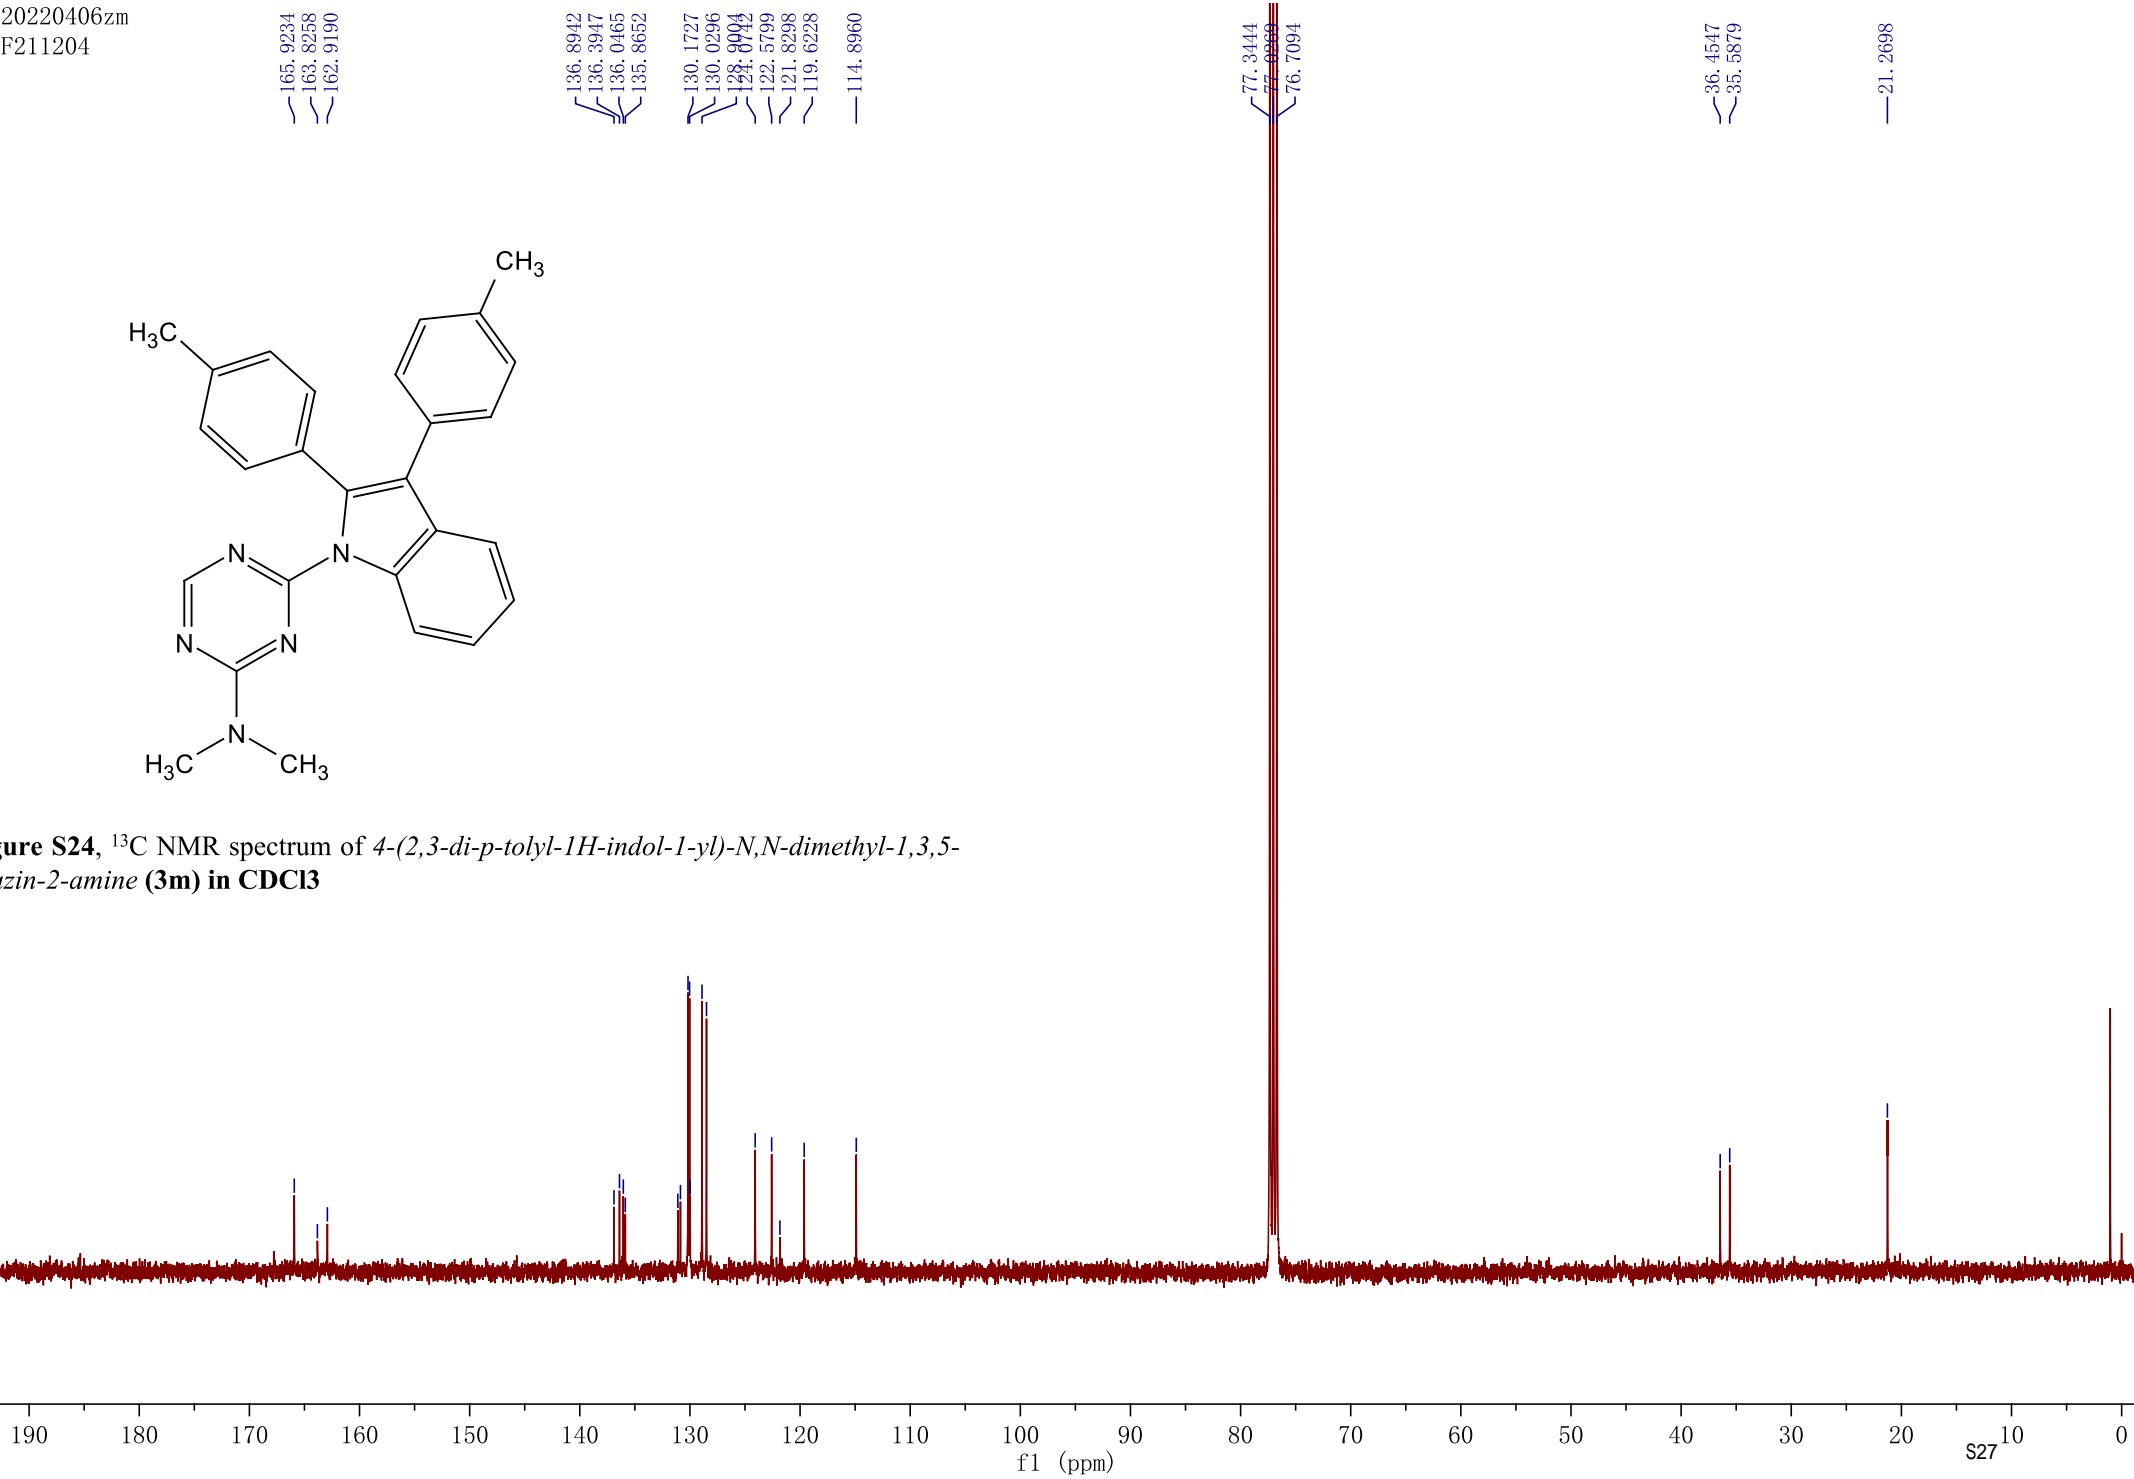

**Figure S24,** <sup>13</sup>C NMR spectrum of 4-(2,3-di-*p*-tolyl-1*H*-indol-1-yl)-*N,N*-dimethyl-1,3,5-triazin-2-amine (**3m**) in CDCl<sub>3</sub>

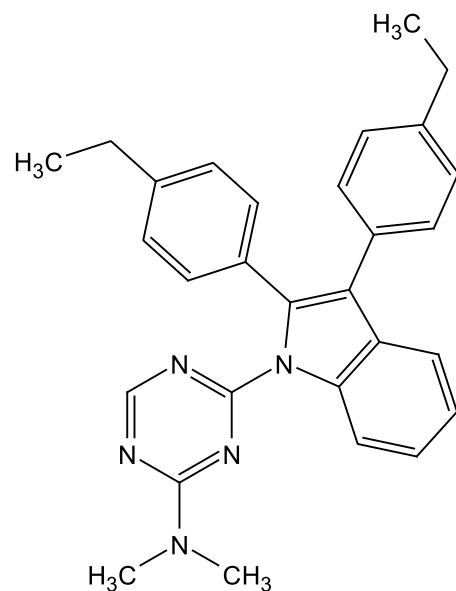

8.5881  
8.5700  
8.5492  
7.6594  
7.6399  
7.3856  
7.3828  
7.3674  
7.3649  
7.3469  
7.3441  
7.2846  
7.2802  
7.2674  
7.2496  
7.2285  
7.2082  
7.1718  
7.1527  
7.1329  
7.0875  
7.0674

3.1250  
2.7103  
2.6913  
2.6720  
2.6525  
2.6333  
2.6143  
2.4504

1.3001  
1.2811  
1.2621  
1.2544  
1.2354  
1.2164

**Figure S25,**  $^1\text{H}$  NMR spectrum of 4-(2,3-bis(4-ethylphenyl)-1H-indol-1-yl)-N,N-dimethyl-1,3,5-triazin-2-amine (**3n**) in  $\text{CDCl}_3$

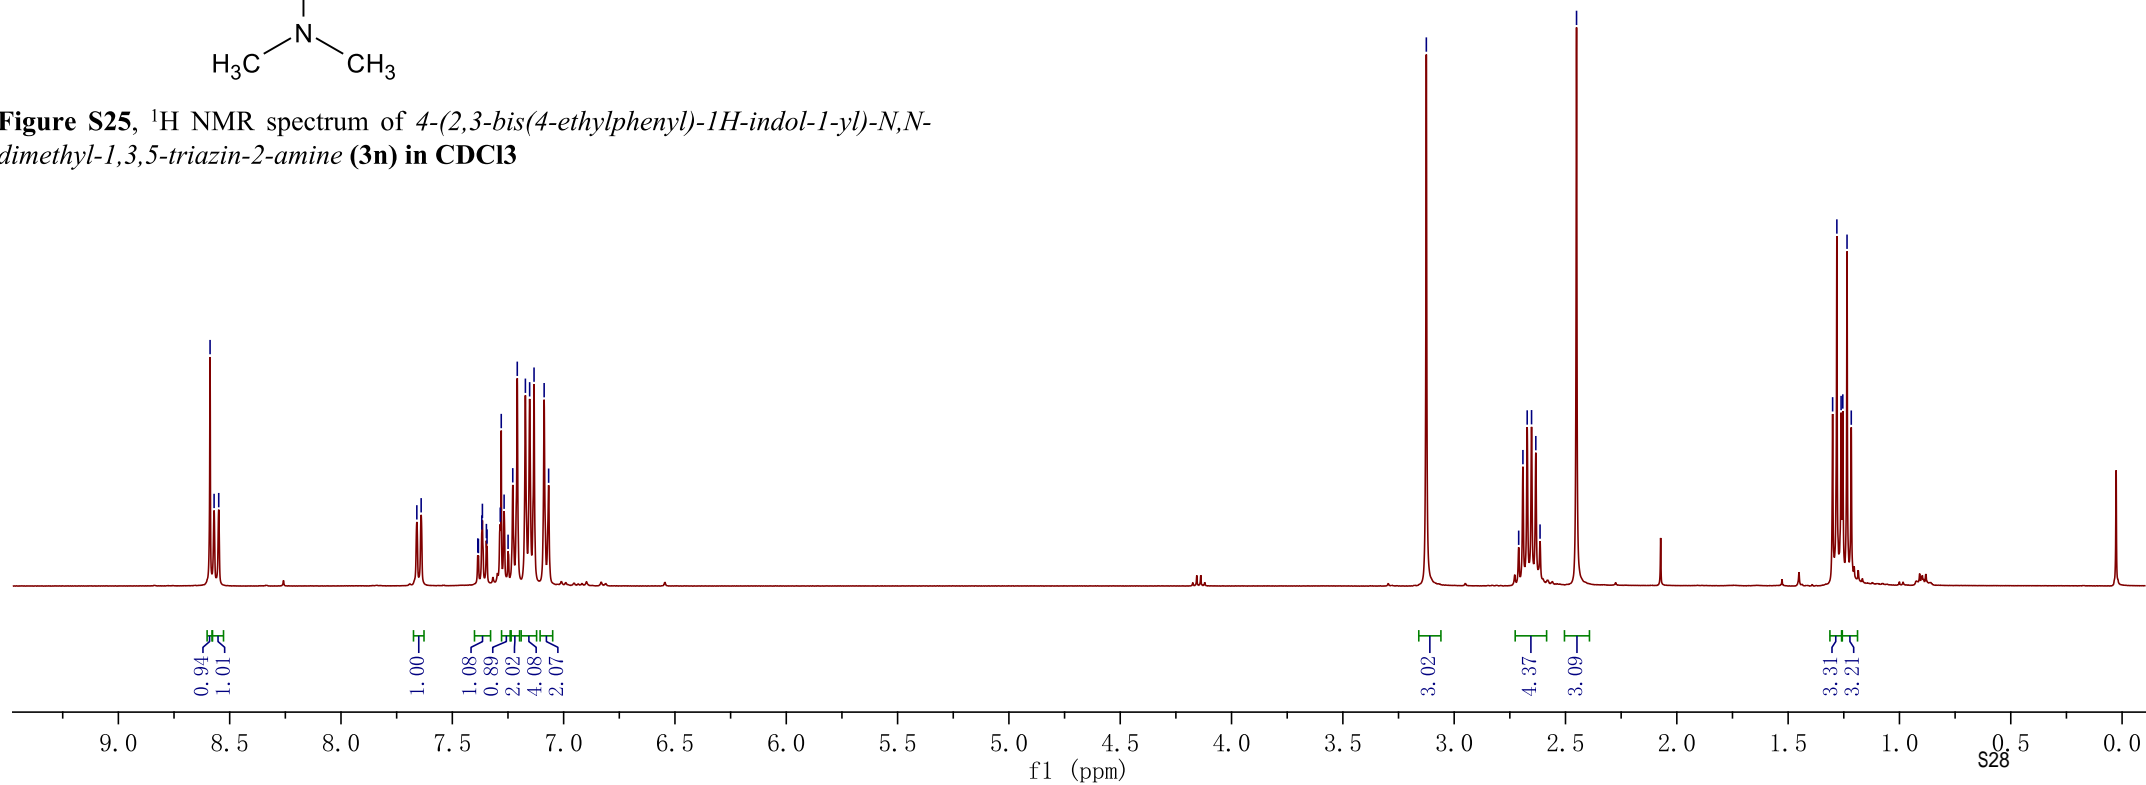



165.9791  
163.8273  
162.9218  
  
142.8310  
142.2831  
  
136.9093  
135.8797  
  
131.0688  
130.2161  
130.1092  
130.0094  
127.6159  
127.3232  
124.0782  
122.5692  
119.8905  
119.8865

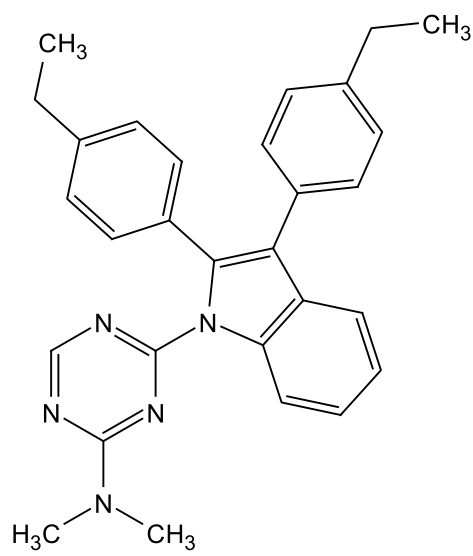

77.3635  
77.0460  
76.7285  
  
36.4228  
35.6374  
  
28.6689  
28.5767  
  
15.7903  
15.3317

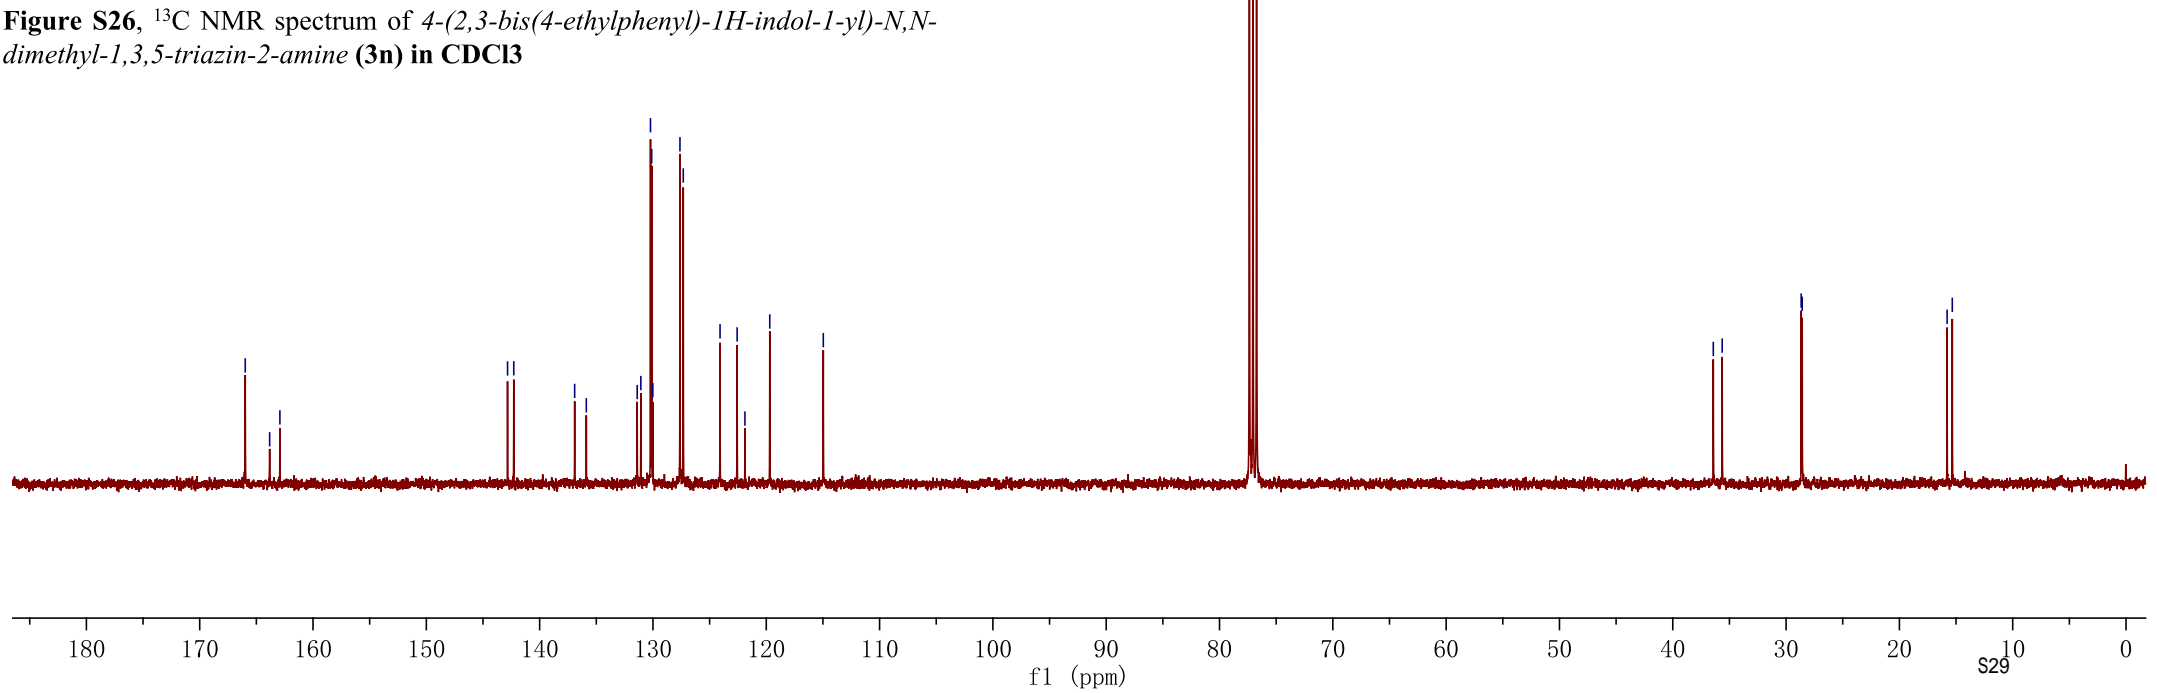

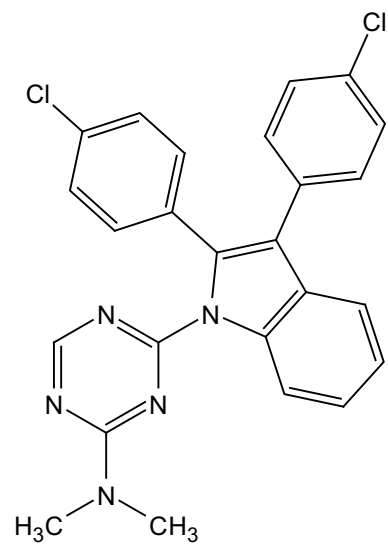

**Figure S27**,  $^1\text{H}$  NMR spectrum of 4-(2,3-bis(4-chlorophenyl)-1H-indol-1-yl)-N,N-dimethyl-1,3,5-triazin-2-amine (**3o**) in  $\text{CDCl}_3$

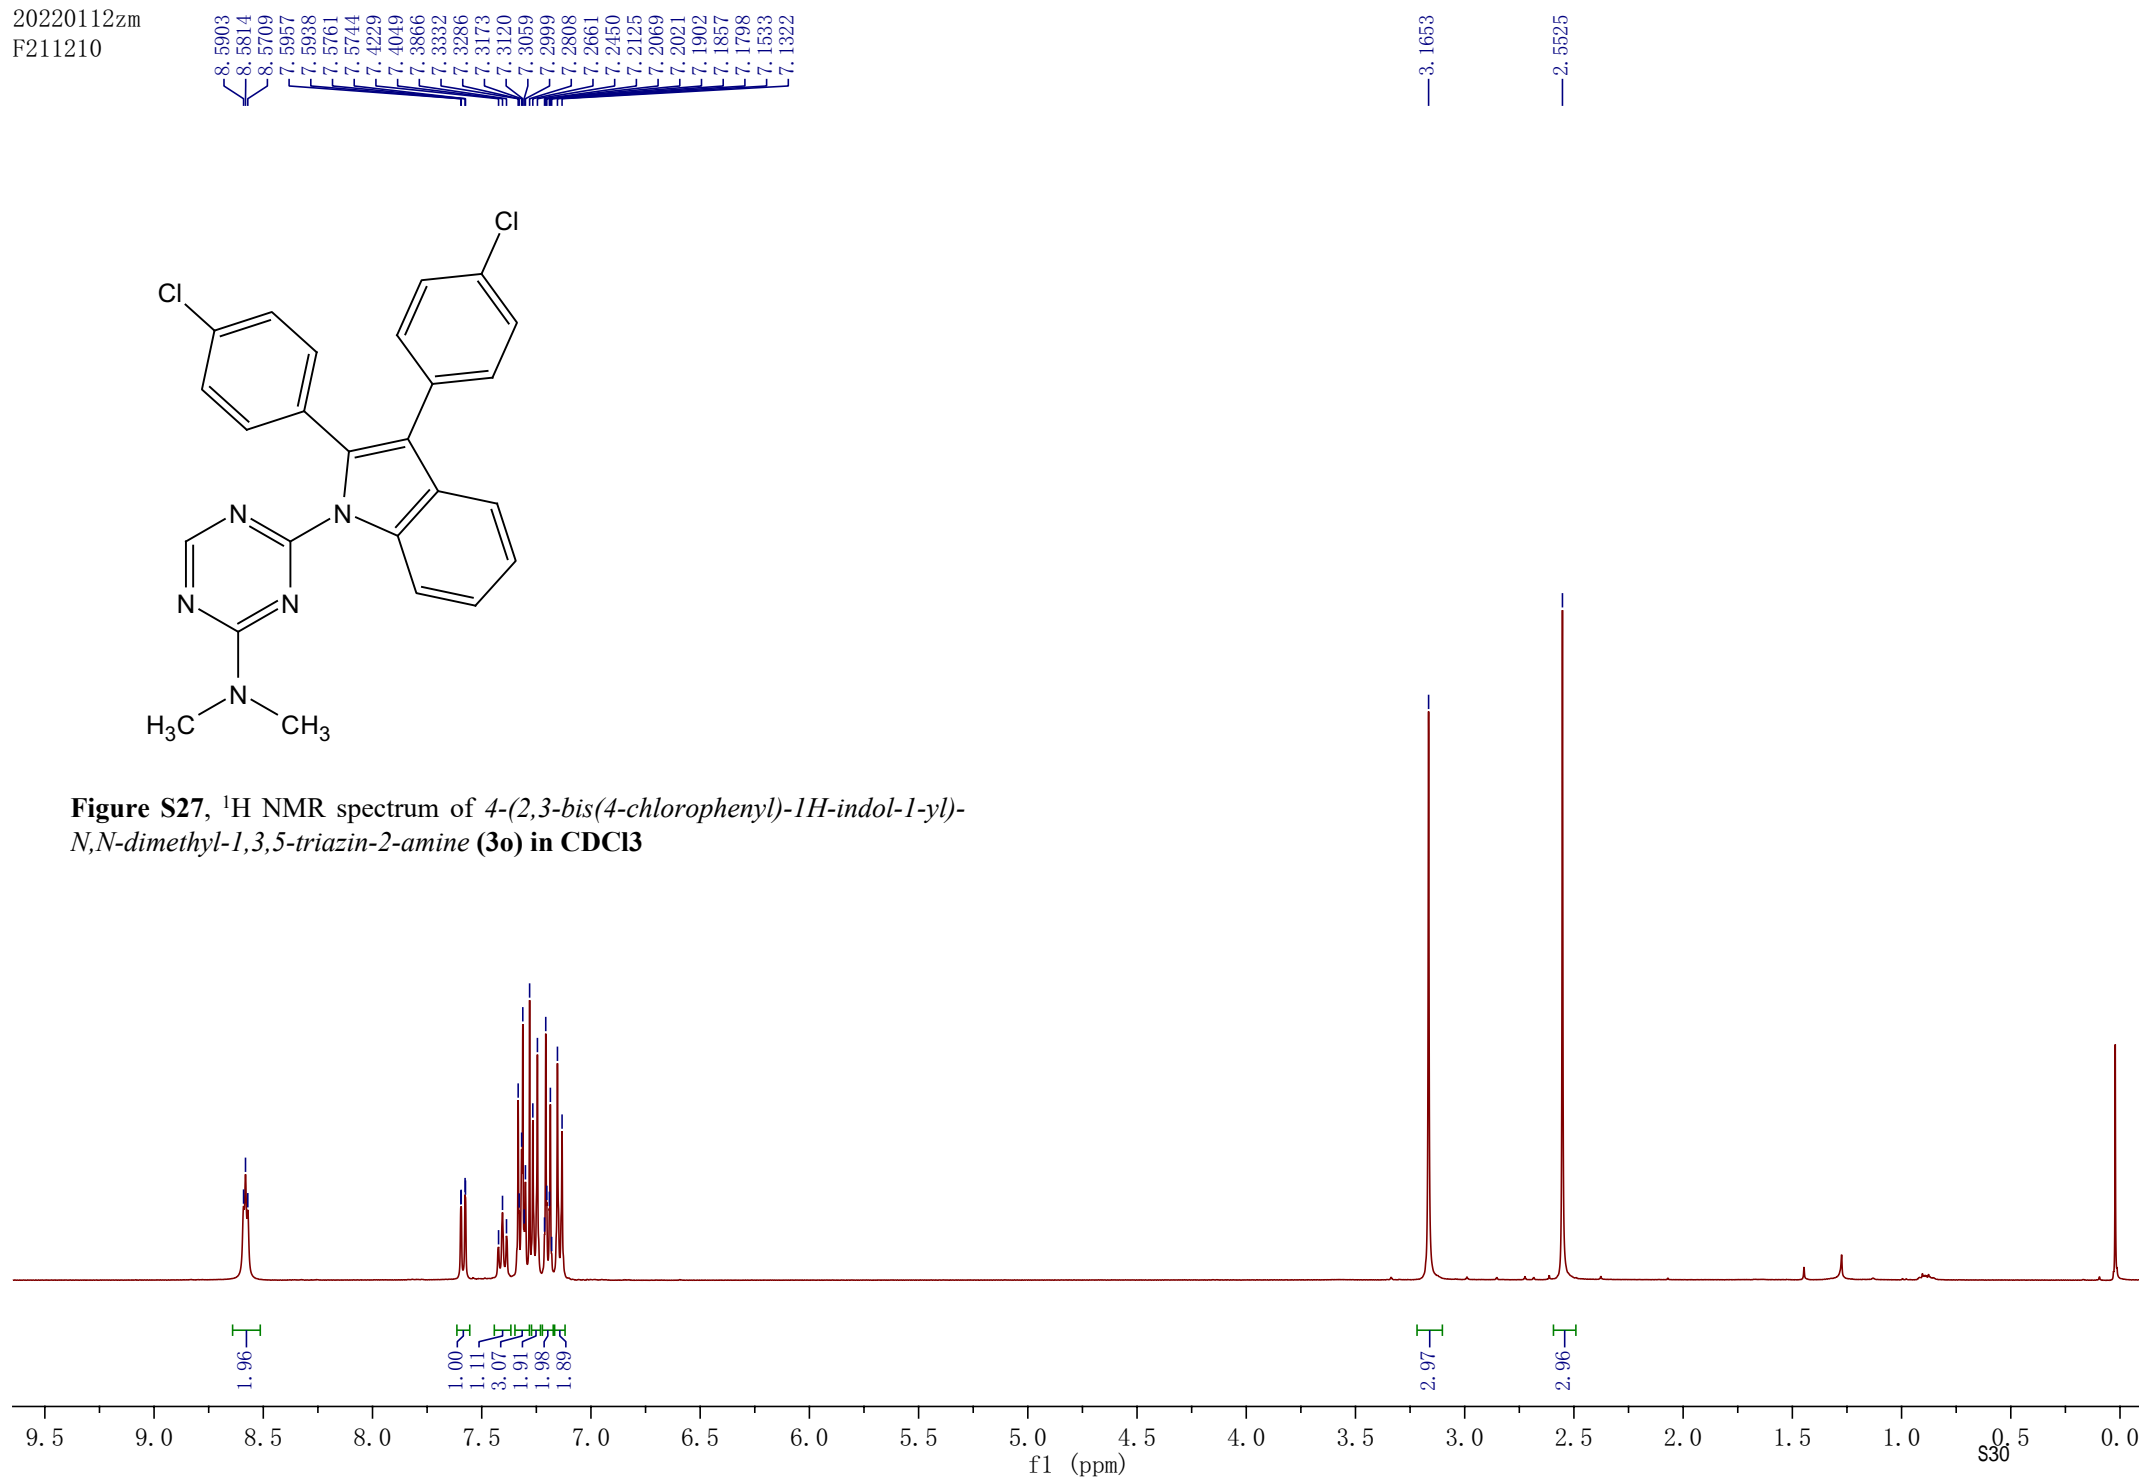

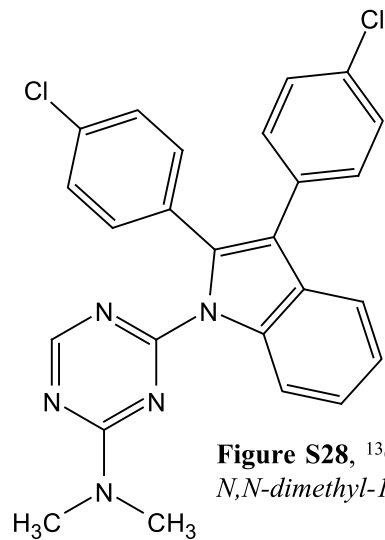

**Figure S28,** <sup>13</sup>C NMR spectrum of 4-(2,3-bis(4-chlorophenyl)-1*H*-indol-1-yl)-*N,N*-dimethyl-1,3,5-triazin-2-amine (**3o**) in CDCl<sub>3</sub>

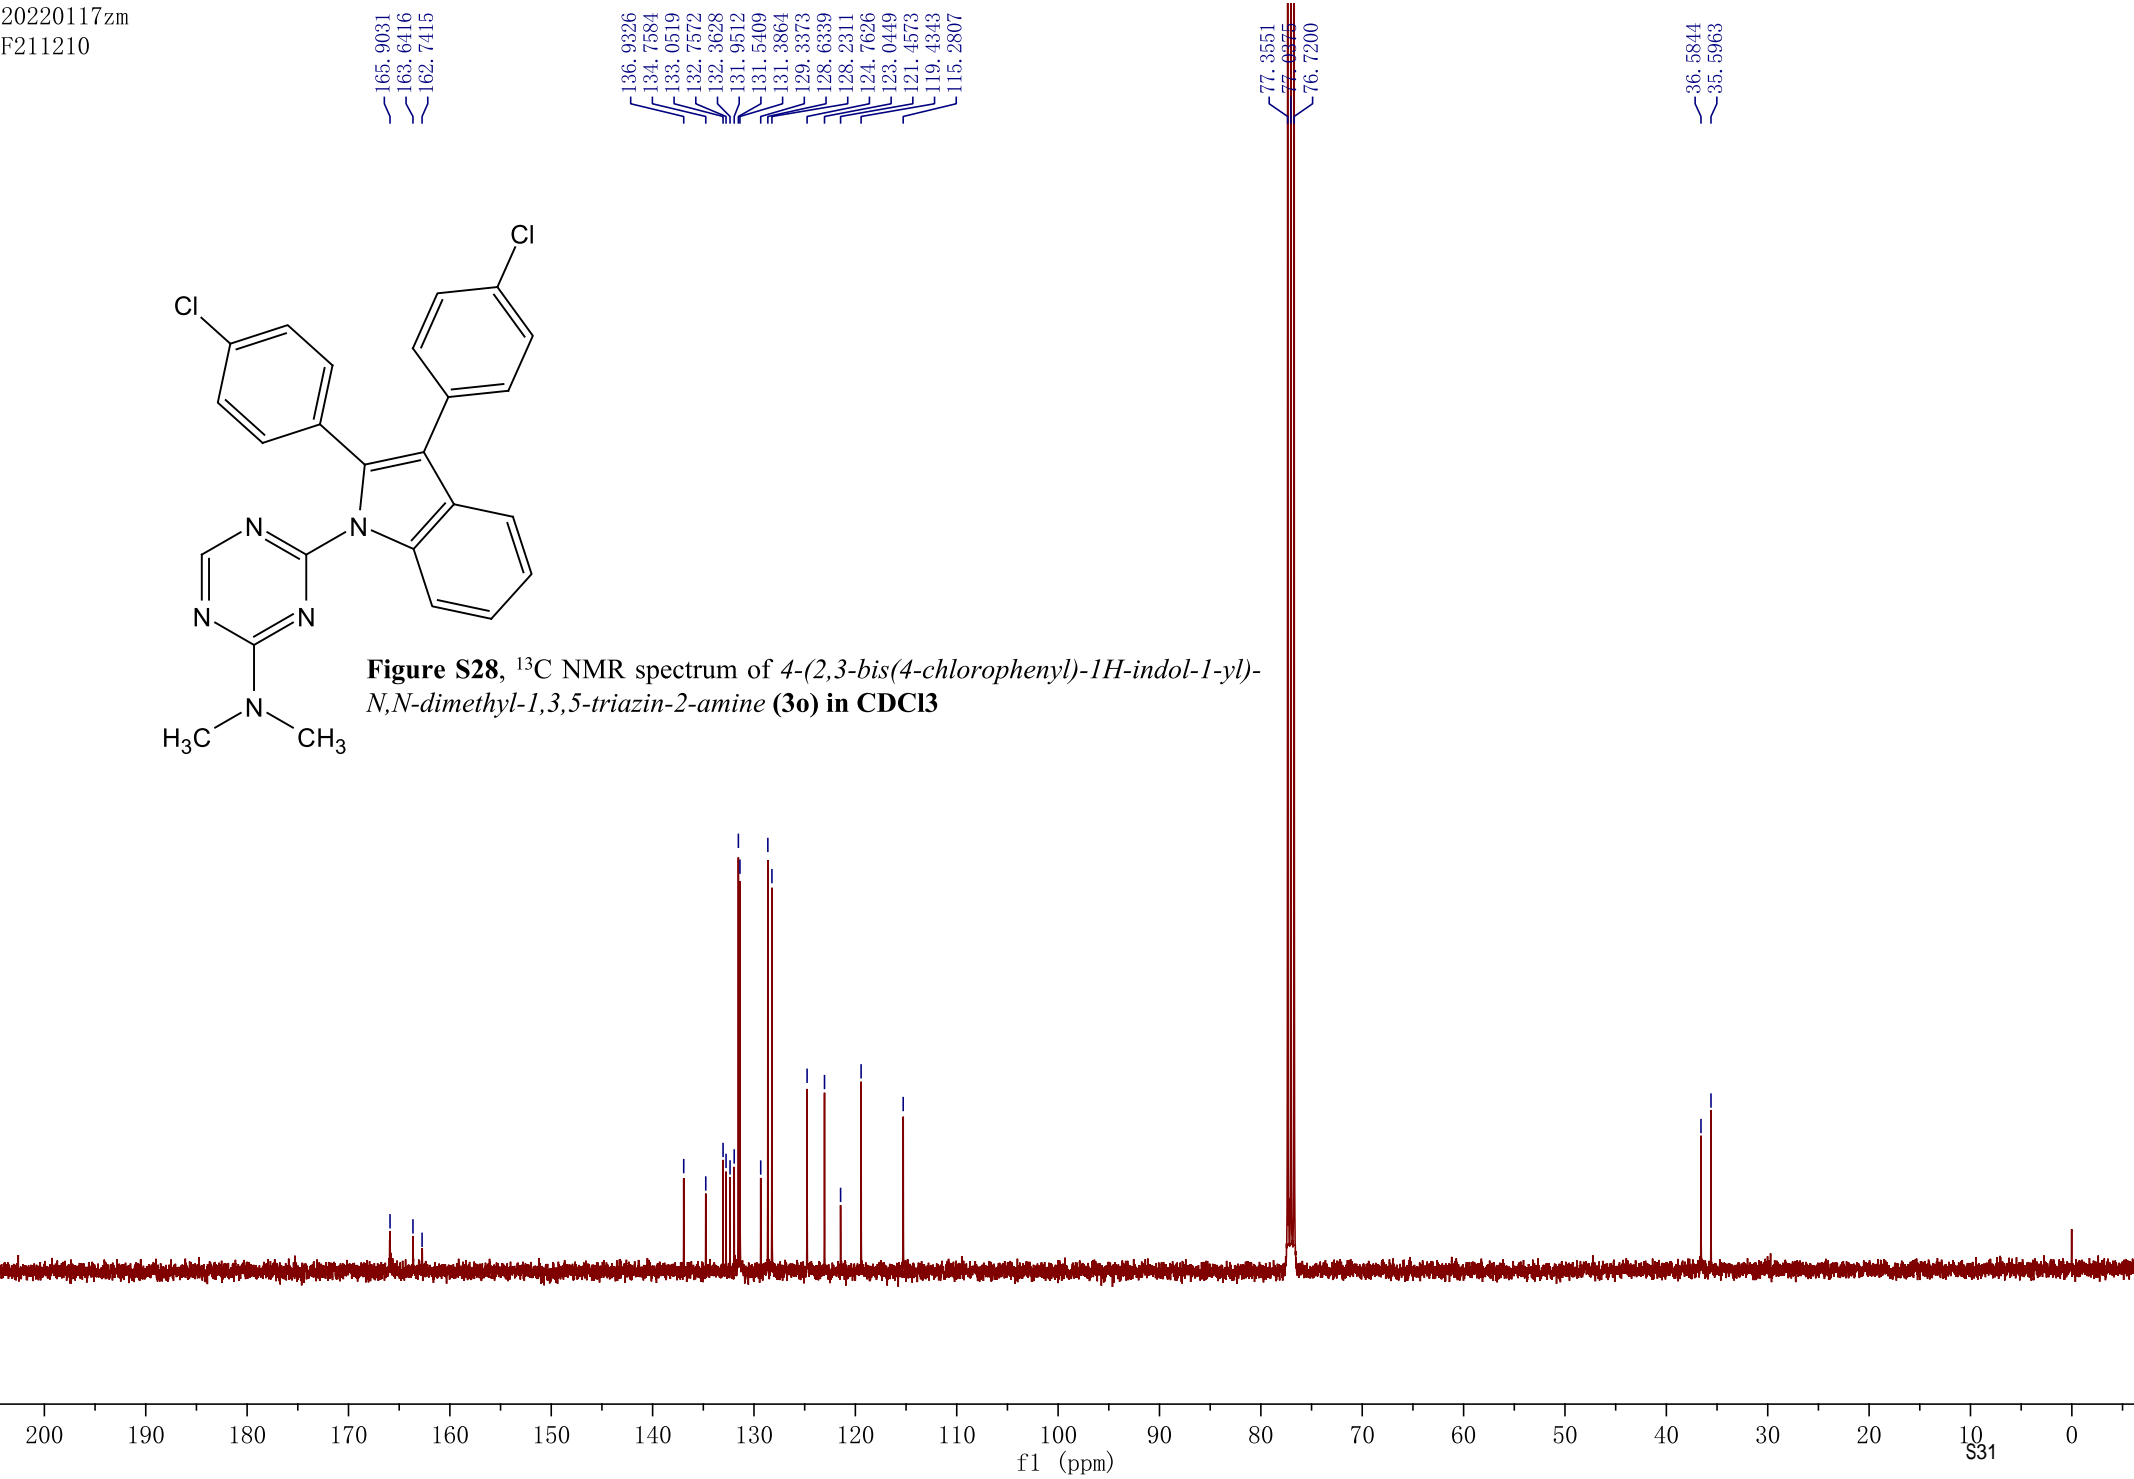

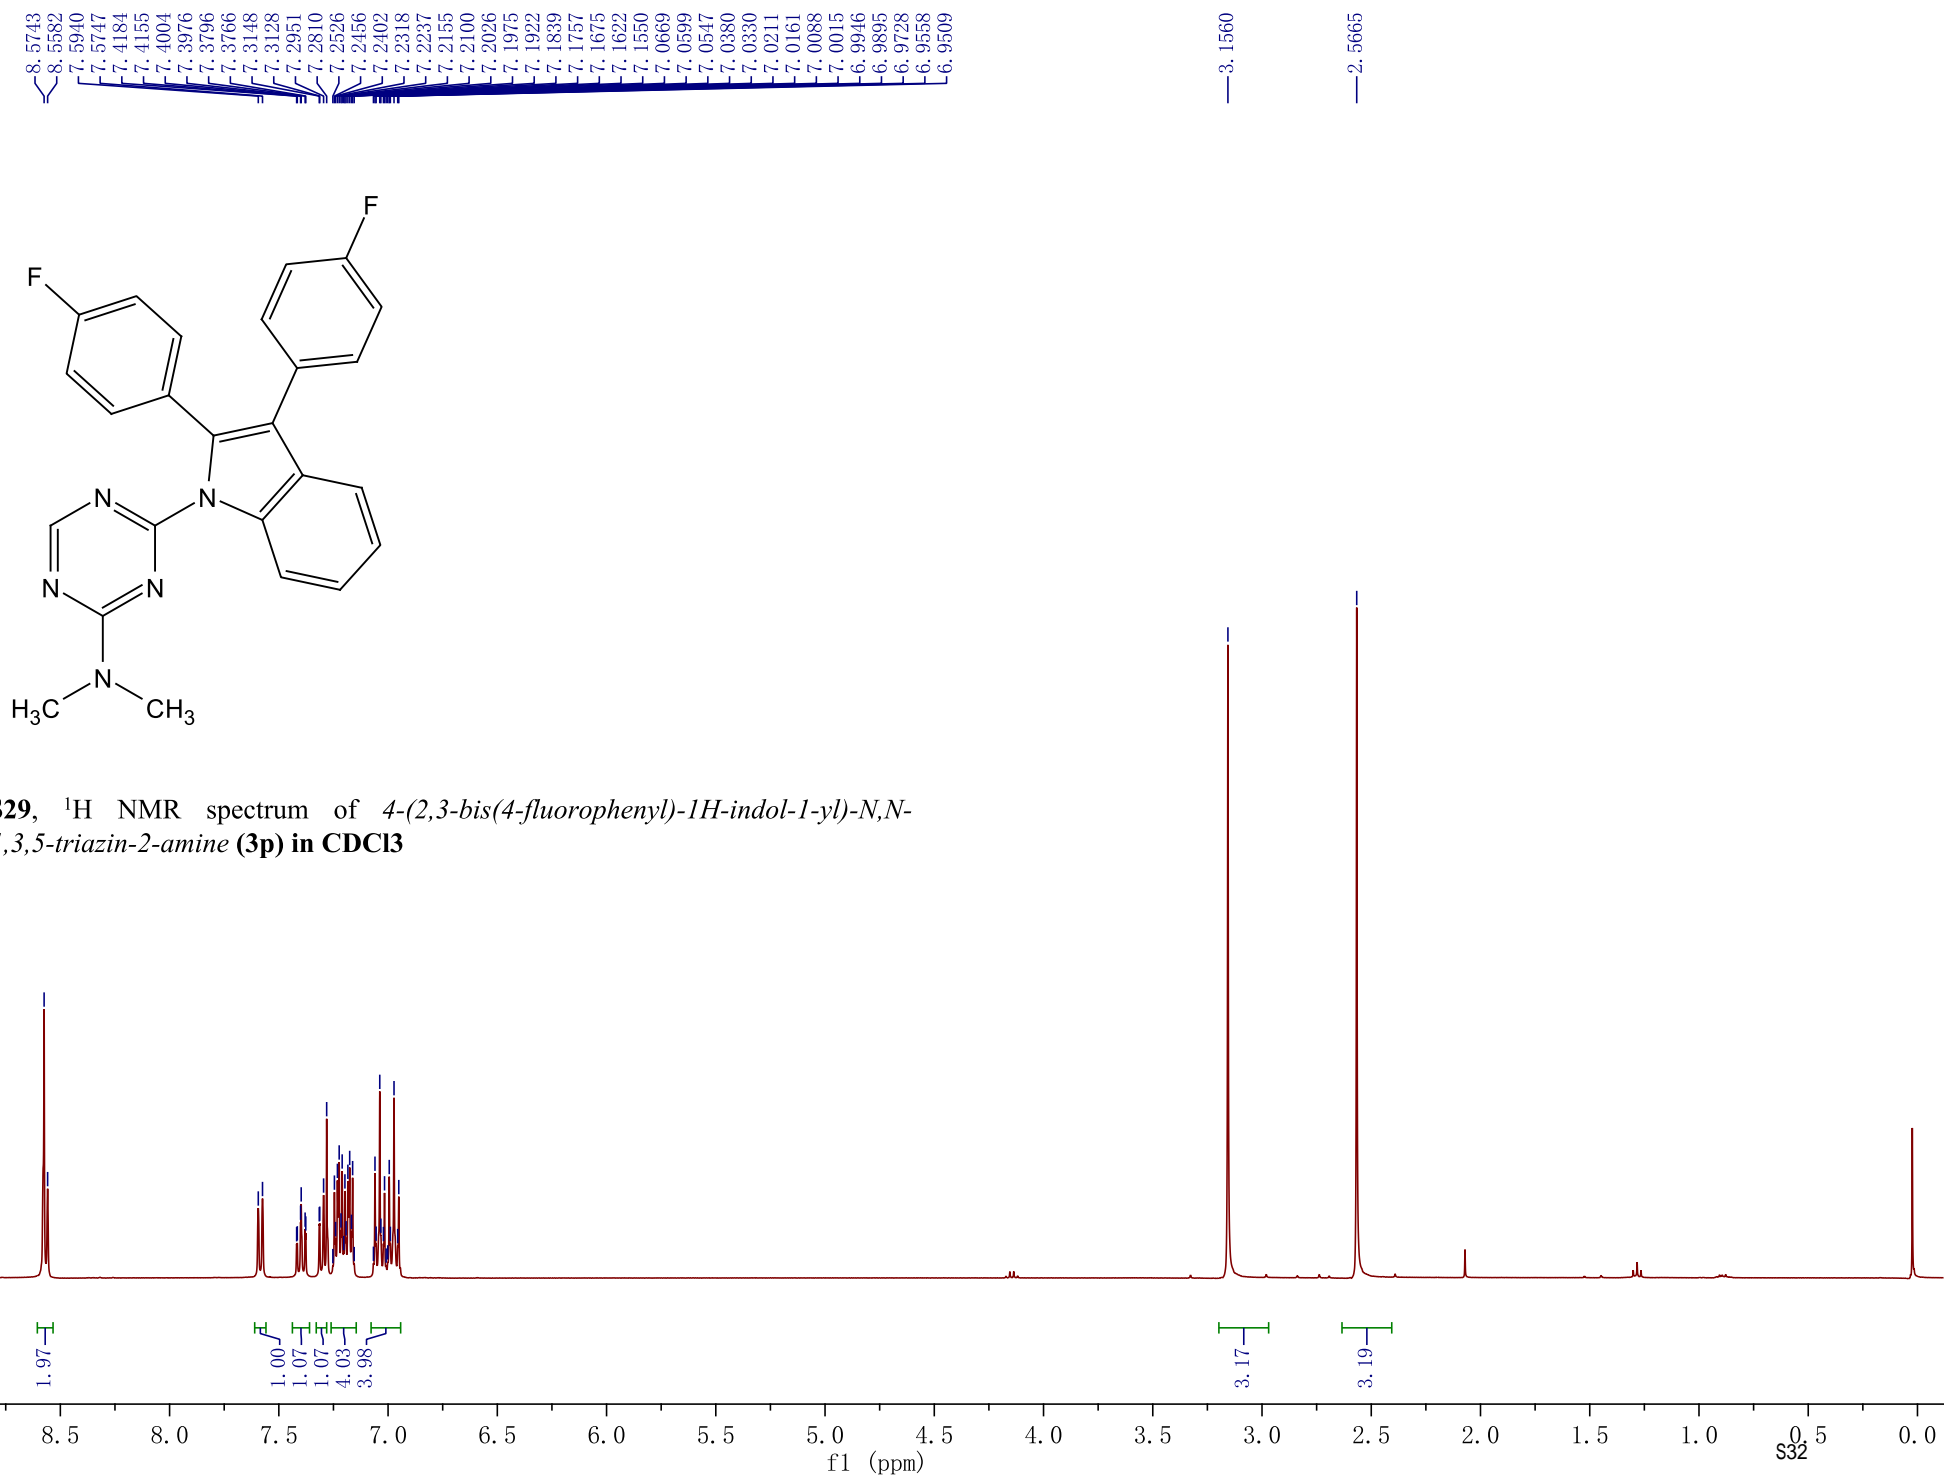

**Figure S29,** <sup>1</sup>H NMR spectrum of 4-(2,3-bis(4-fluorophenyl)-1H-indol-1-yl)-N,N-dimethyl-1,3,5-triazin-2-amine (**3p**) in CDCl<sub>3</sub>

20220117zm  
F220101

166.0190  
163.8212  
163.1674  
162.9829  
162.8165  
160.7134  
160.5384

136.7916  
134.9024  
131.8707  
131.7904  
131.7092  
130.0161  
129.9815  
129.5581  
129.5016  
129.4689  
124.5504  
122.8993  
121.4321  
119.4161  
115.4261  
115.2138  
115.1612  
115.0849  
114.8705

77.3572  
77.0857  
76.7221

36.5098  
35.6625

**Figure S30,**  $^1\text{H}$  NMR spectrum of 4-(2,3-bis(4-fluorophenyl)-1*H*-indol-1-yl)-*N,N*-dimethyl-1,3,5-triazin-2-amine (**3p**) in  $\text{CDCl}_3$

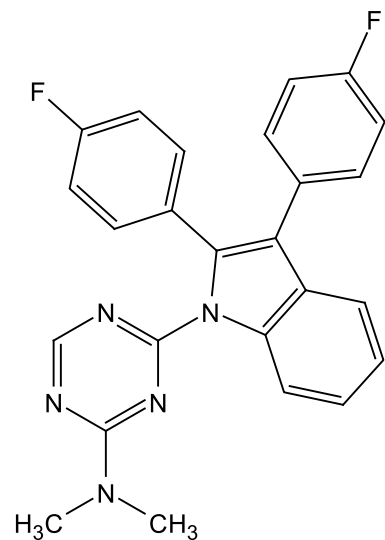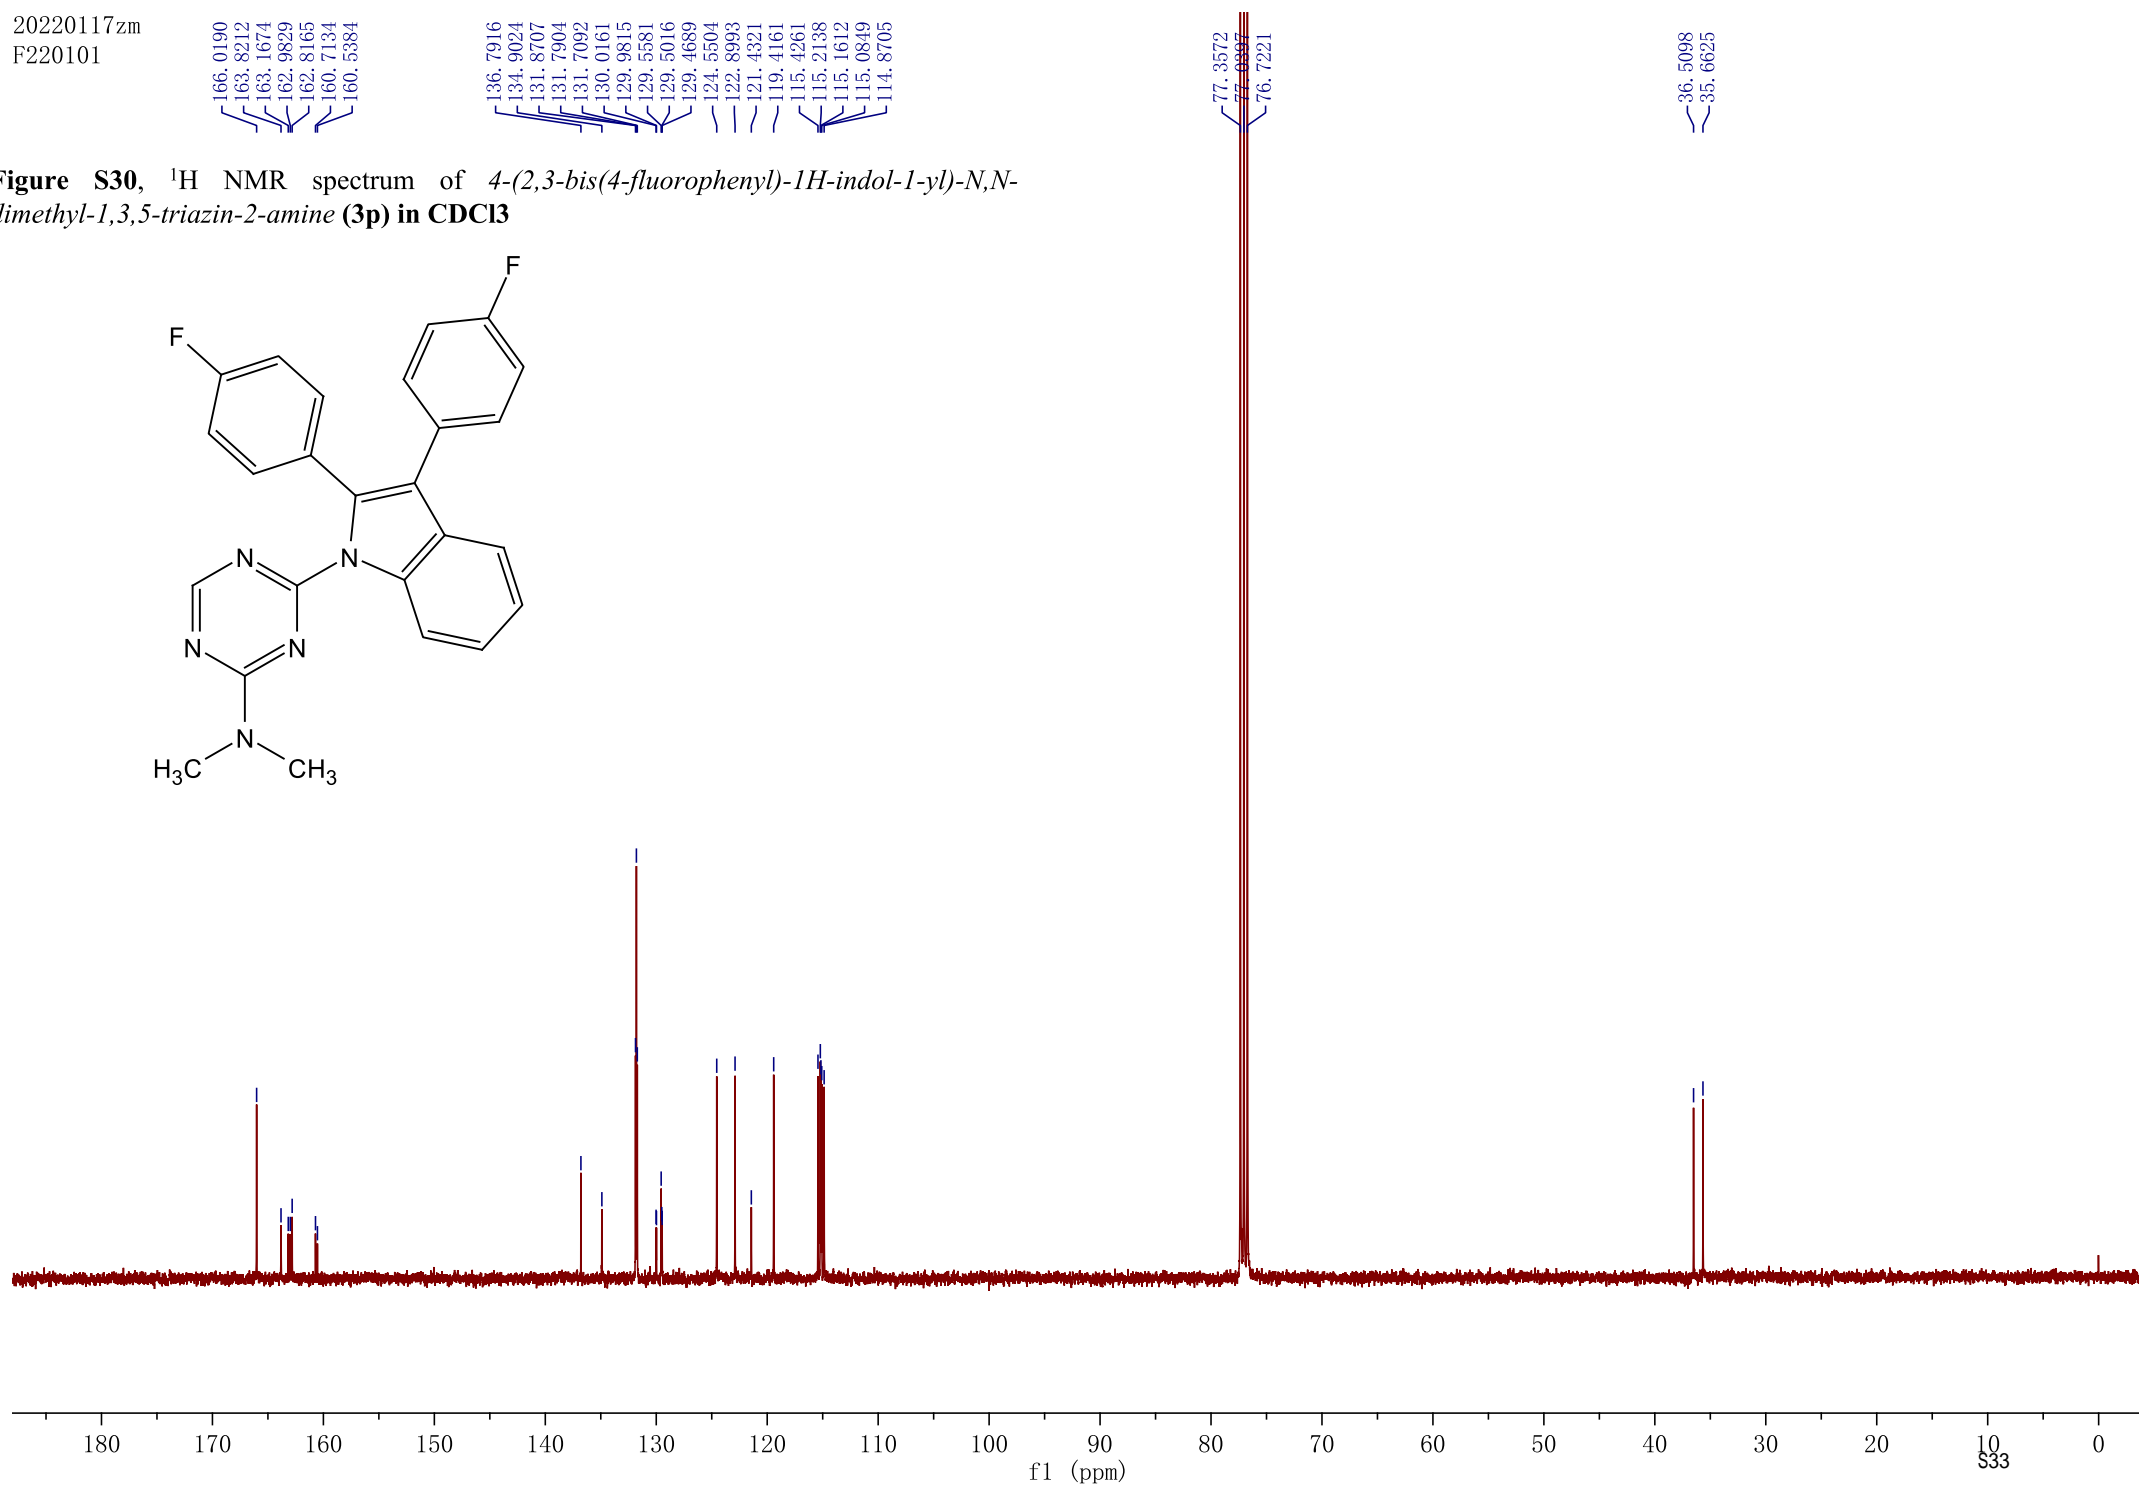

20220112zm  
F220105

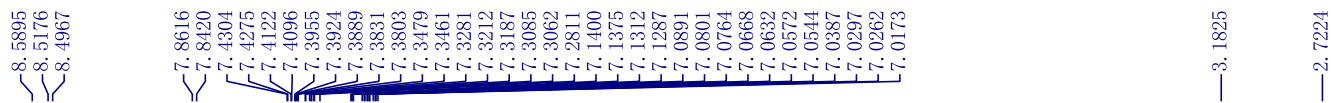

**Figure S31,** <sup>1</sup>H NMR spectrum of 4-(2,3-di(thiophen-2-yl)-1H-indol-1-yl)-N,N-dimethyl-1,3,5-triazin-2-amine (3q) in CDCl<sub>3</sub>

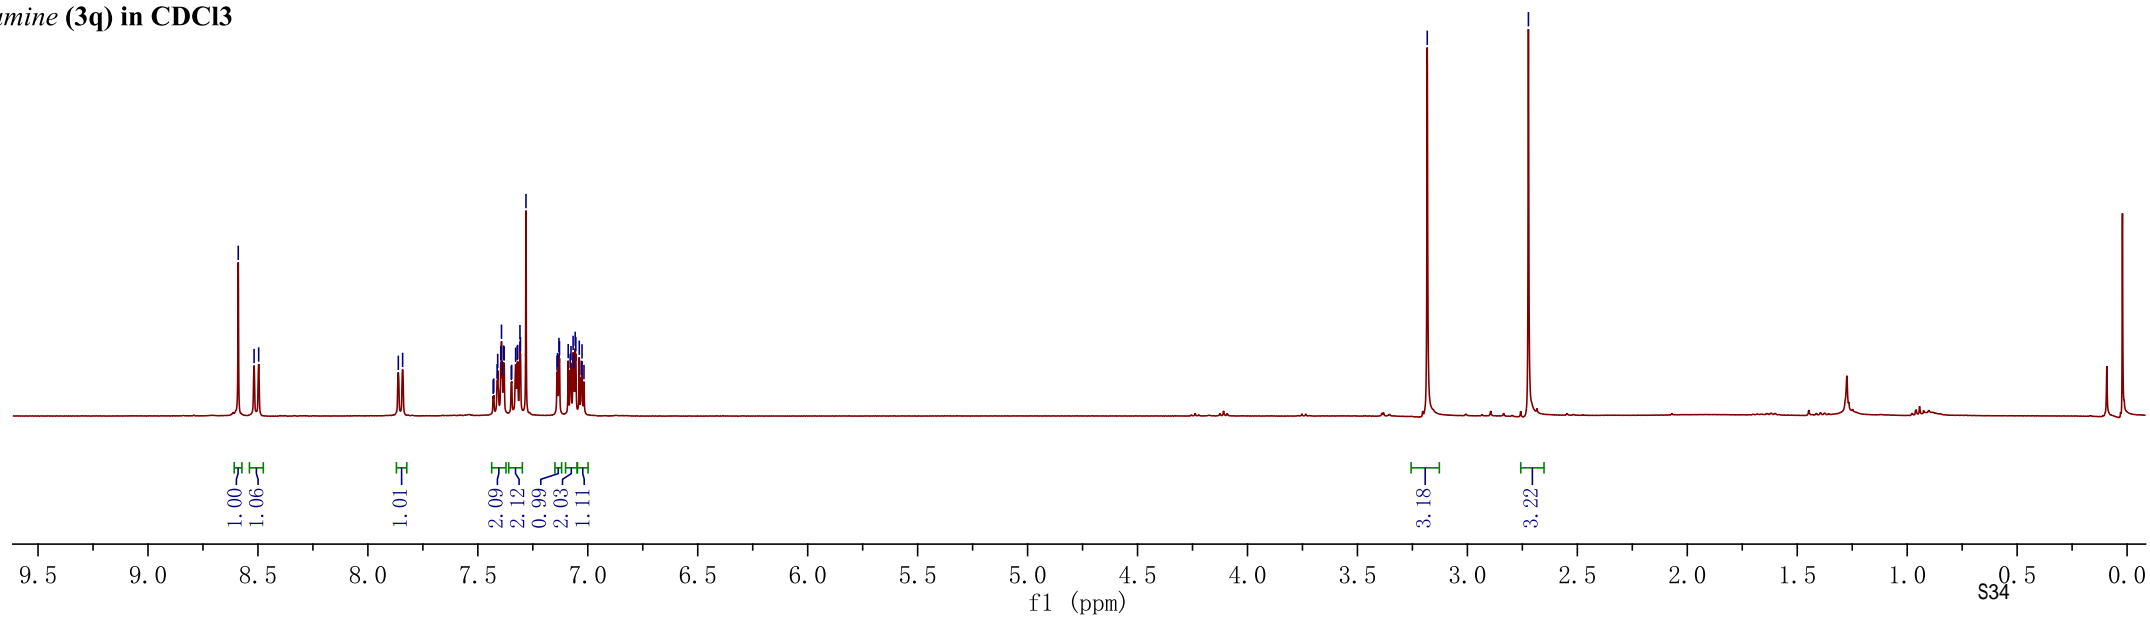

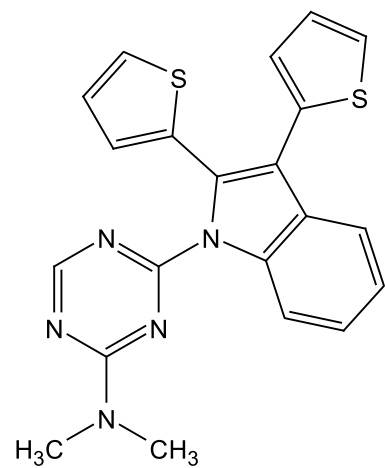

166.2180  
164.3428  
162.7112  
136.7479  
134.7049  
134.3950  
129.5054  
129.0458  
128.8426  
127.0651  
126.8305  
126.7027  
125.4315  
124.8707  
122.8996  
120.0210  
117.4949  
115.0449  
77.3533  
77.0858  
76.7183  
36.5147  
35.9854  
29.7189

**Figure S32,** <sup>13</sup>C NMR spectrum of 4-(2,3-di(thiophen-2-yl)-1H-indol-1-yl)-N,N-dimethyl-1,3,5-triazin-2-amine (**3q**) in CDCl<sub>3</sub>

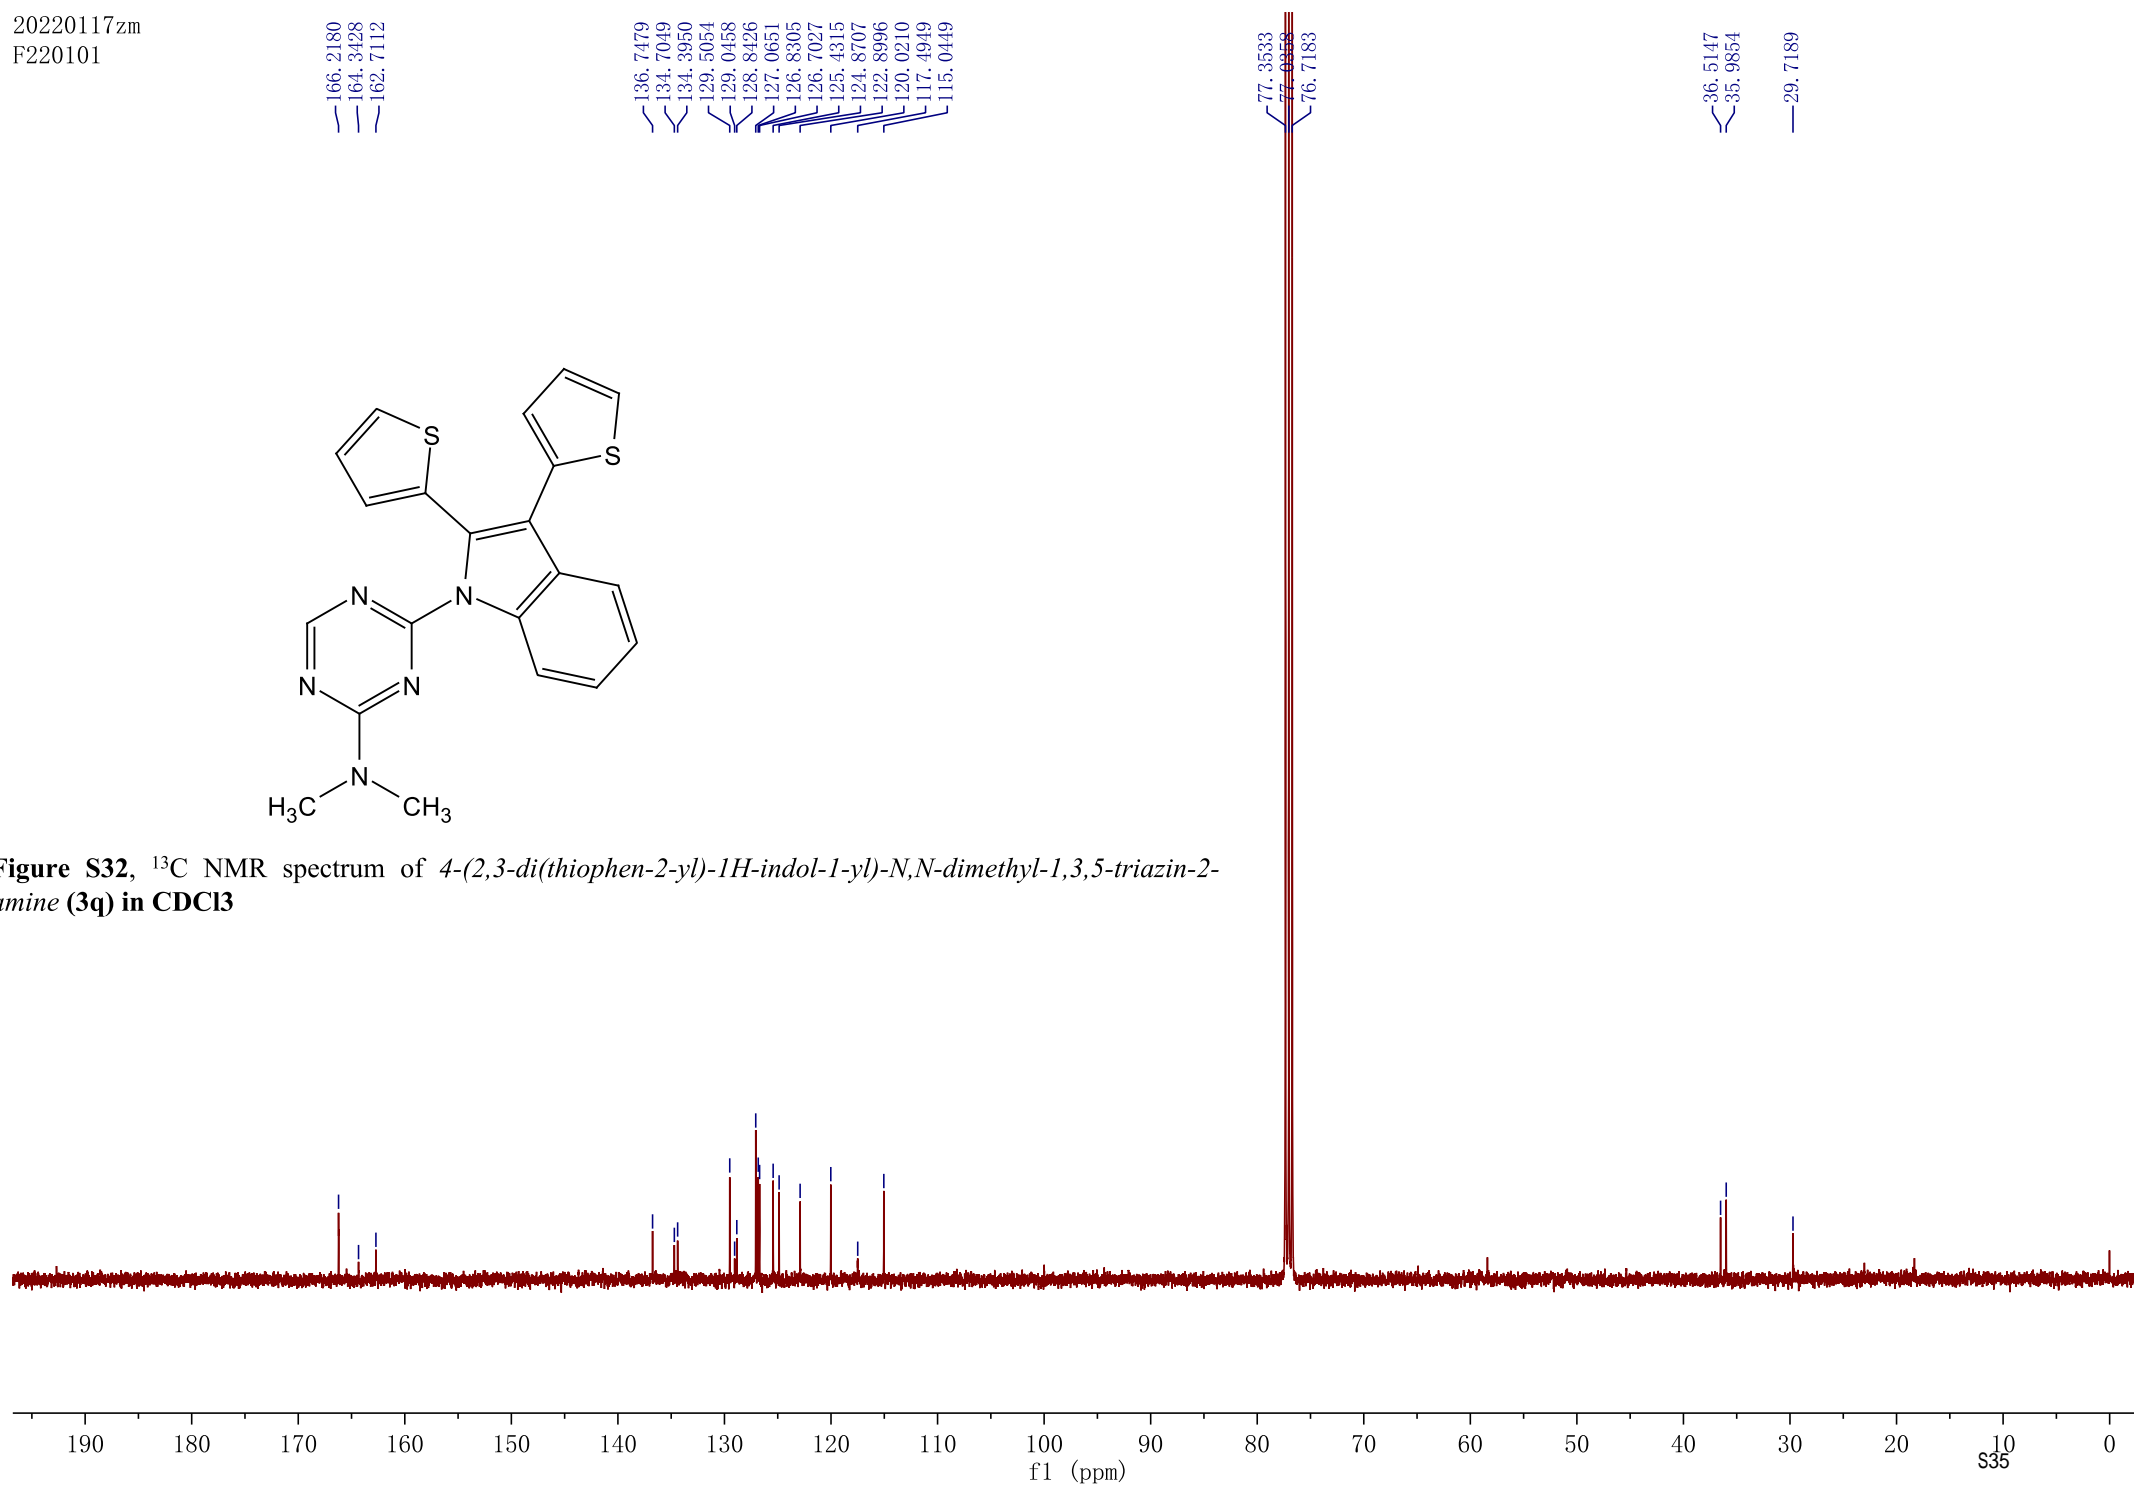

20211112zm  
f211104

8.5926  
8.5770  
8.5561

7.6283  
7.6088  
7.3888  
7.3687  
7.3504  
7.2927  
7.2811  
7.2739  
7.2555  
7.2193  
7.2146  
7.1978  
7.1317  
7.1141  
7.0669  
7.0469  
6.8817  
6.8606

3.8351

3.1455  
3.1337

2.5945  
2.5757  
2.5566  
2.4545

1.6614  
1.6428  
1.6243  
1.6060

0.9807  
0.9625  
0.9442

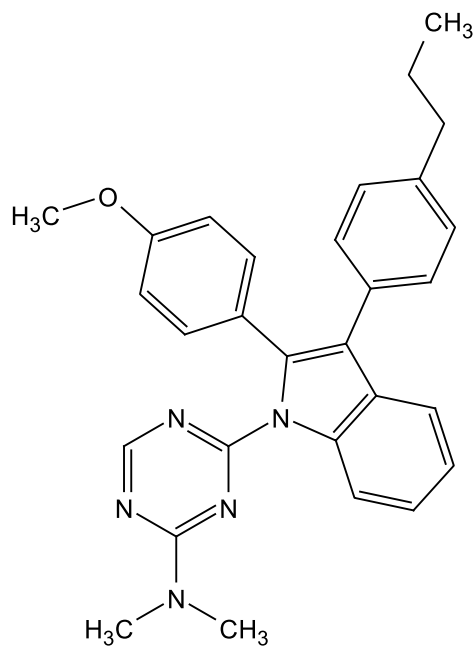

**Figure S33,**  $^1\text{H}$  NMR spectrum of 4-(2-(4-methoxyphenyl)-3-(4-propylphenyl)-1H-indol-1-yl)-N,N-dimethyl-1,3,5-triazin-2-amine (**3r** and **3r'**) in  $\text{CDCl}_3$

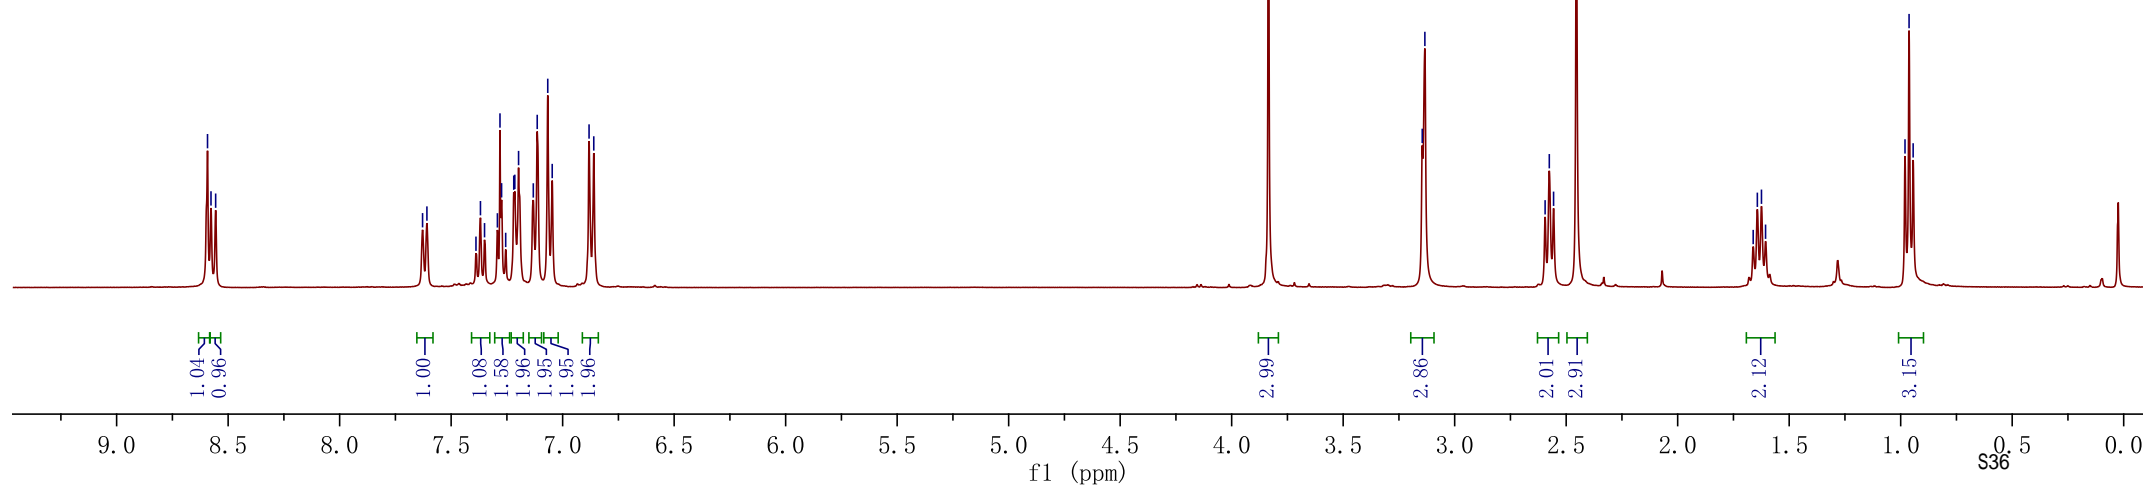



20211116zm  
1104

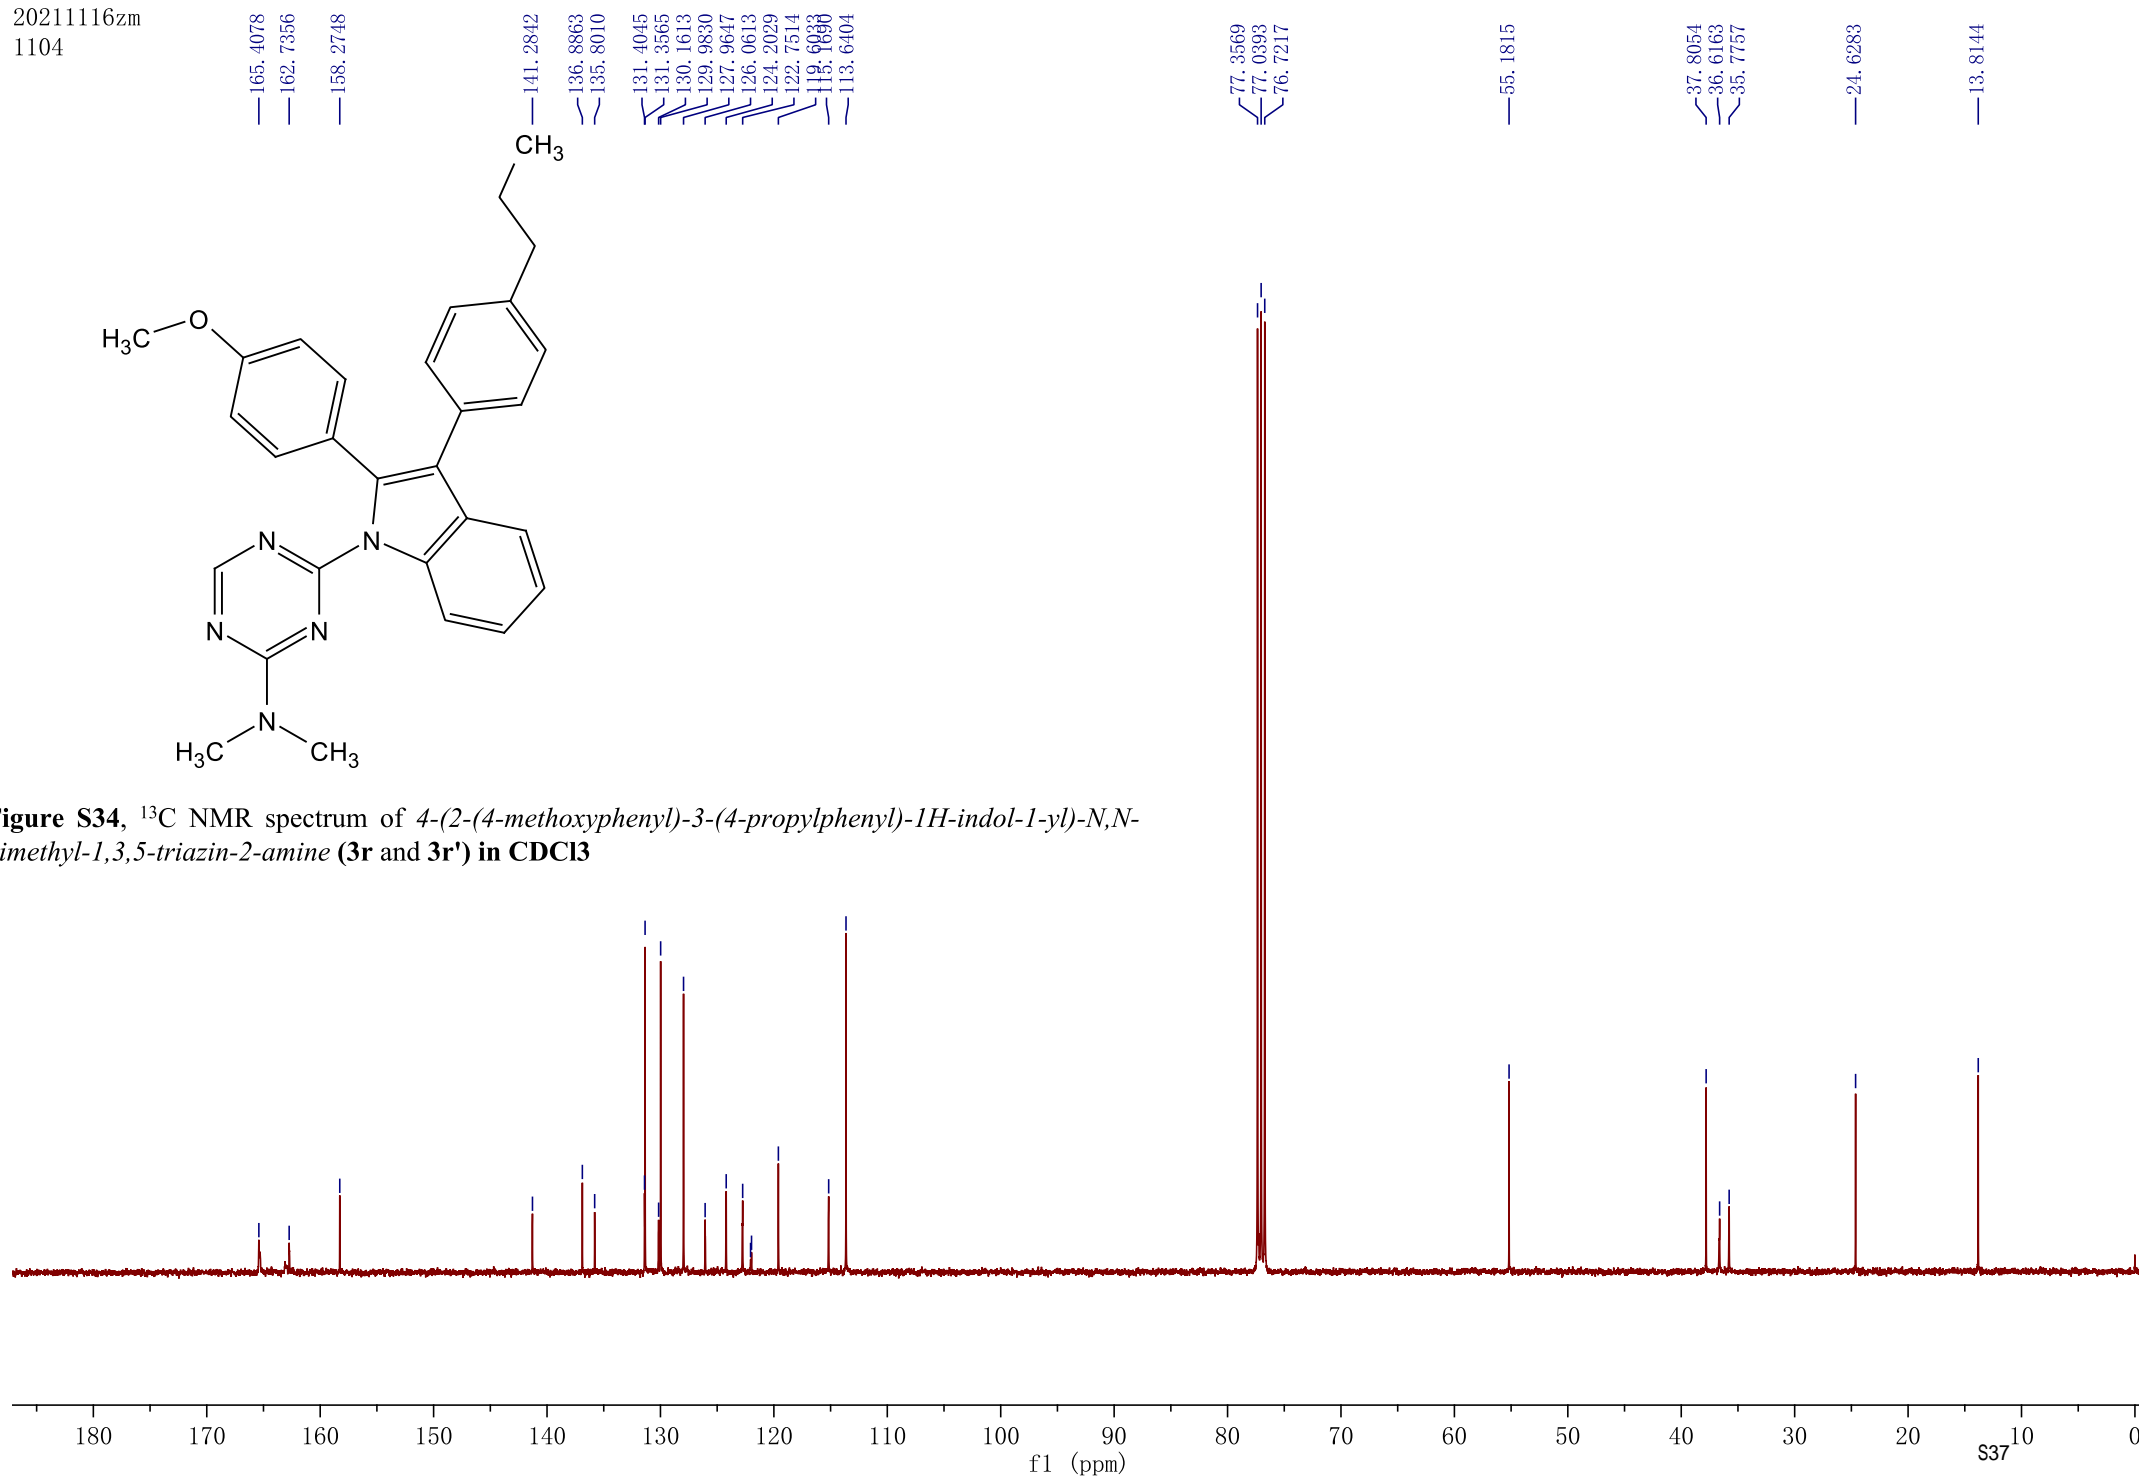

**Figure S34,** <sup>13</sup>C NMR spectrum of 4-(2-(4-methoxyphenyl)-3-(4-propylphenyl)-1H-indol-1-yl)-N,N-dimethyl-1,3,5-triazin-2-amine (**3r** and **3r'**) in CDCl<sub>3</sub>

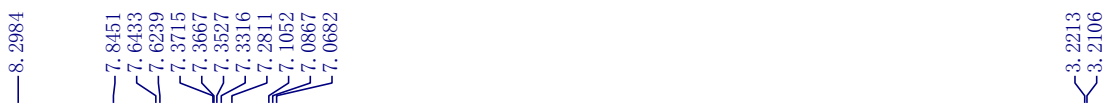

**Figure S35,** <sup>1</sup>H NMR spectrum of *N*<sup>2</sup>,*N*<sup>2</sup>-dimethyl-*N*<sup>4</sup>-phenyl-1,3,5-triazine-2,4-diamine (**1a**) in CDCl<sub>3</sub>

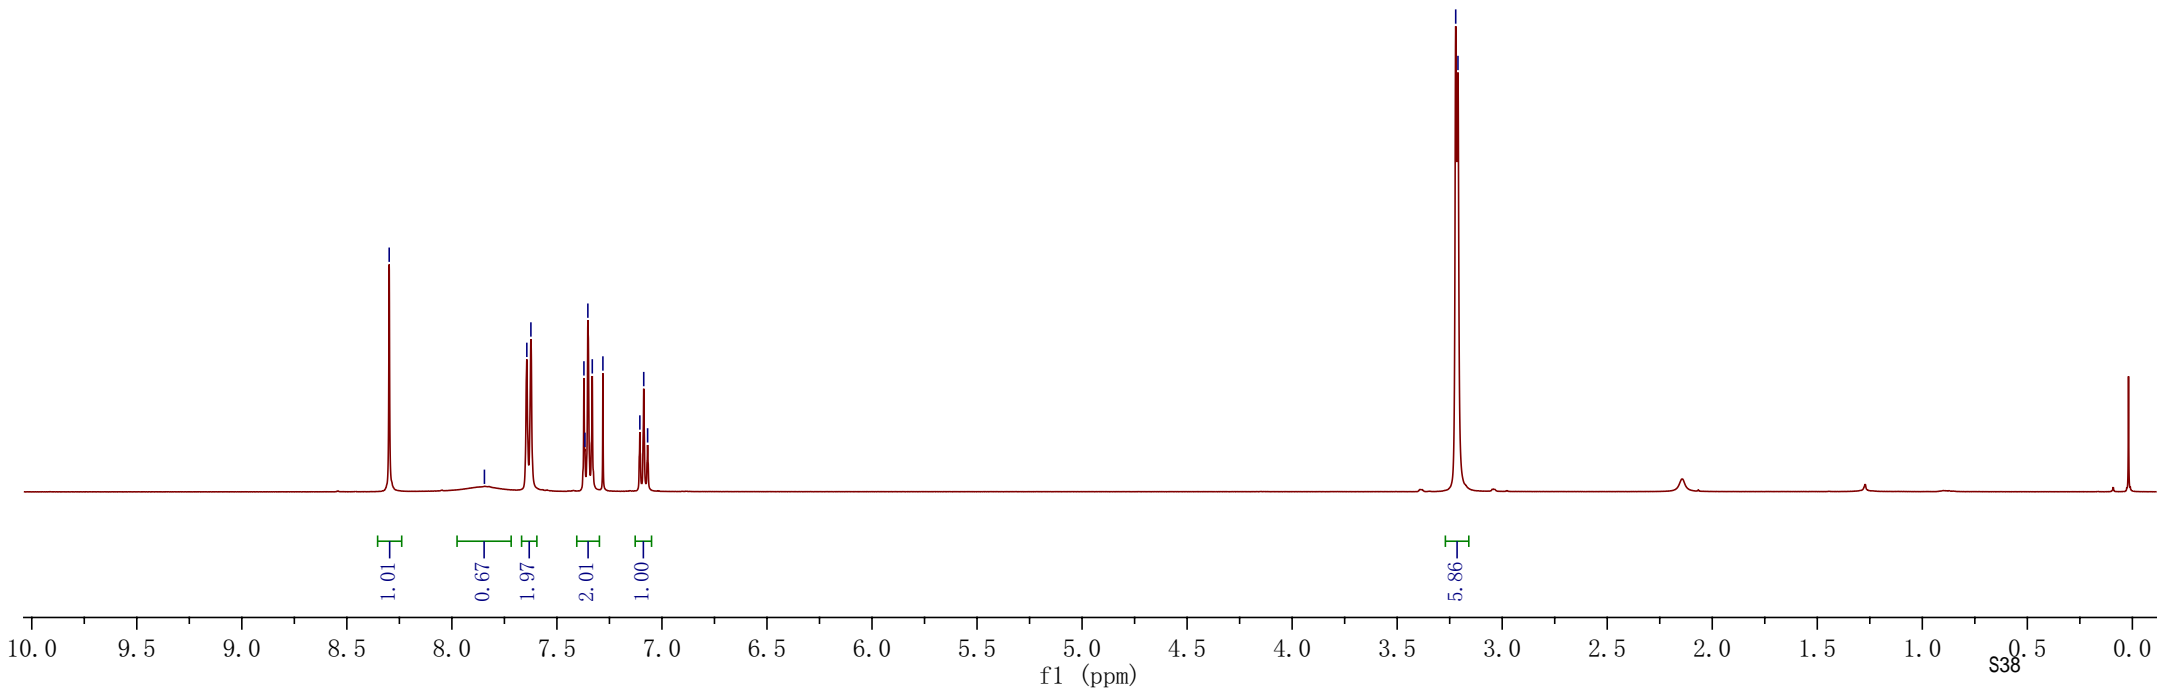

20220117zm  
20211128

165.3911  
164.5384  
163.1780

138.7478

128.8372

123.1583

120.2078

77.3639  
77.0463  
76.7287

36.4359

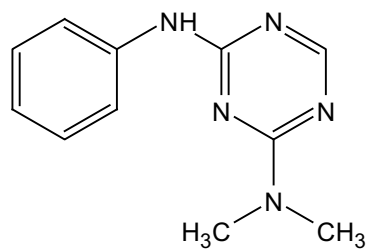

**Figure S36,**  $^{13}\text{C}$  NMR spectrum of  $N^2,N^2$ -dimethyl- $N^4$ -phenyl-1,3,5-triazine-2,4-diamine (**1a**) in  $\text{CDCl}_3$

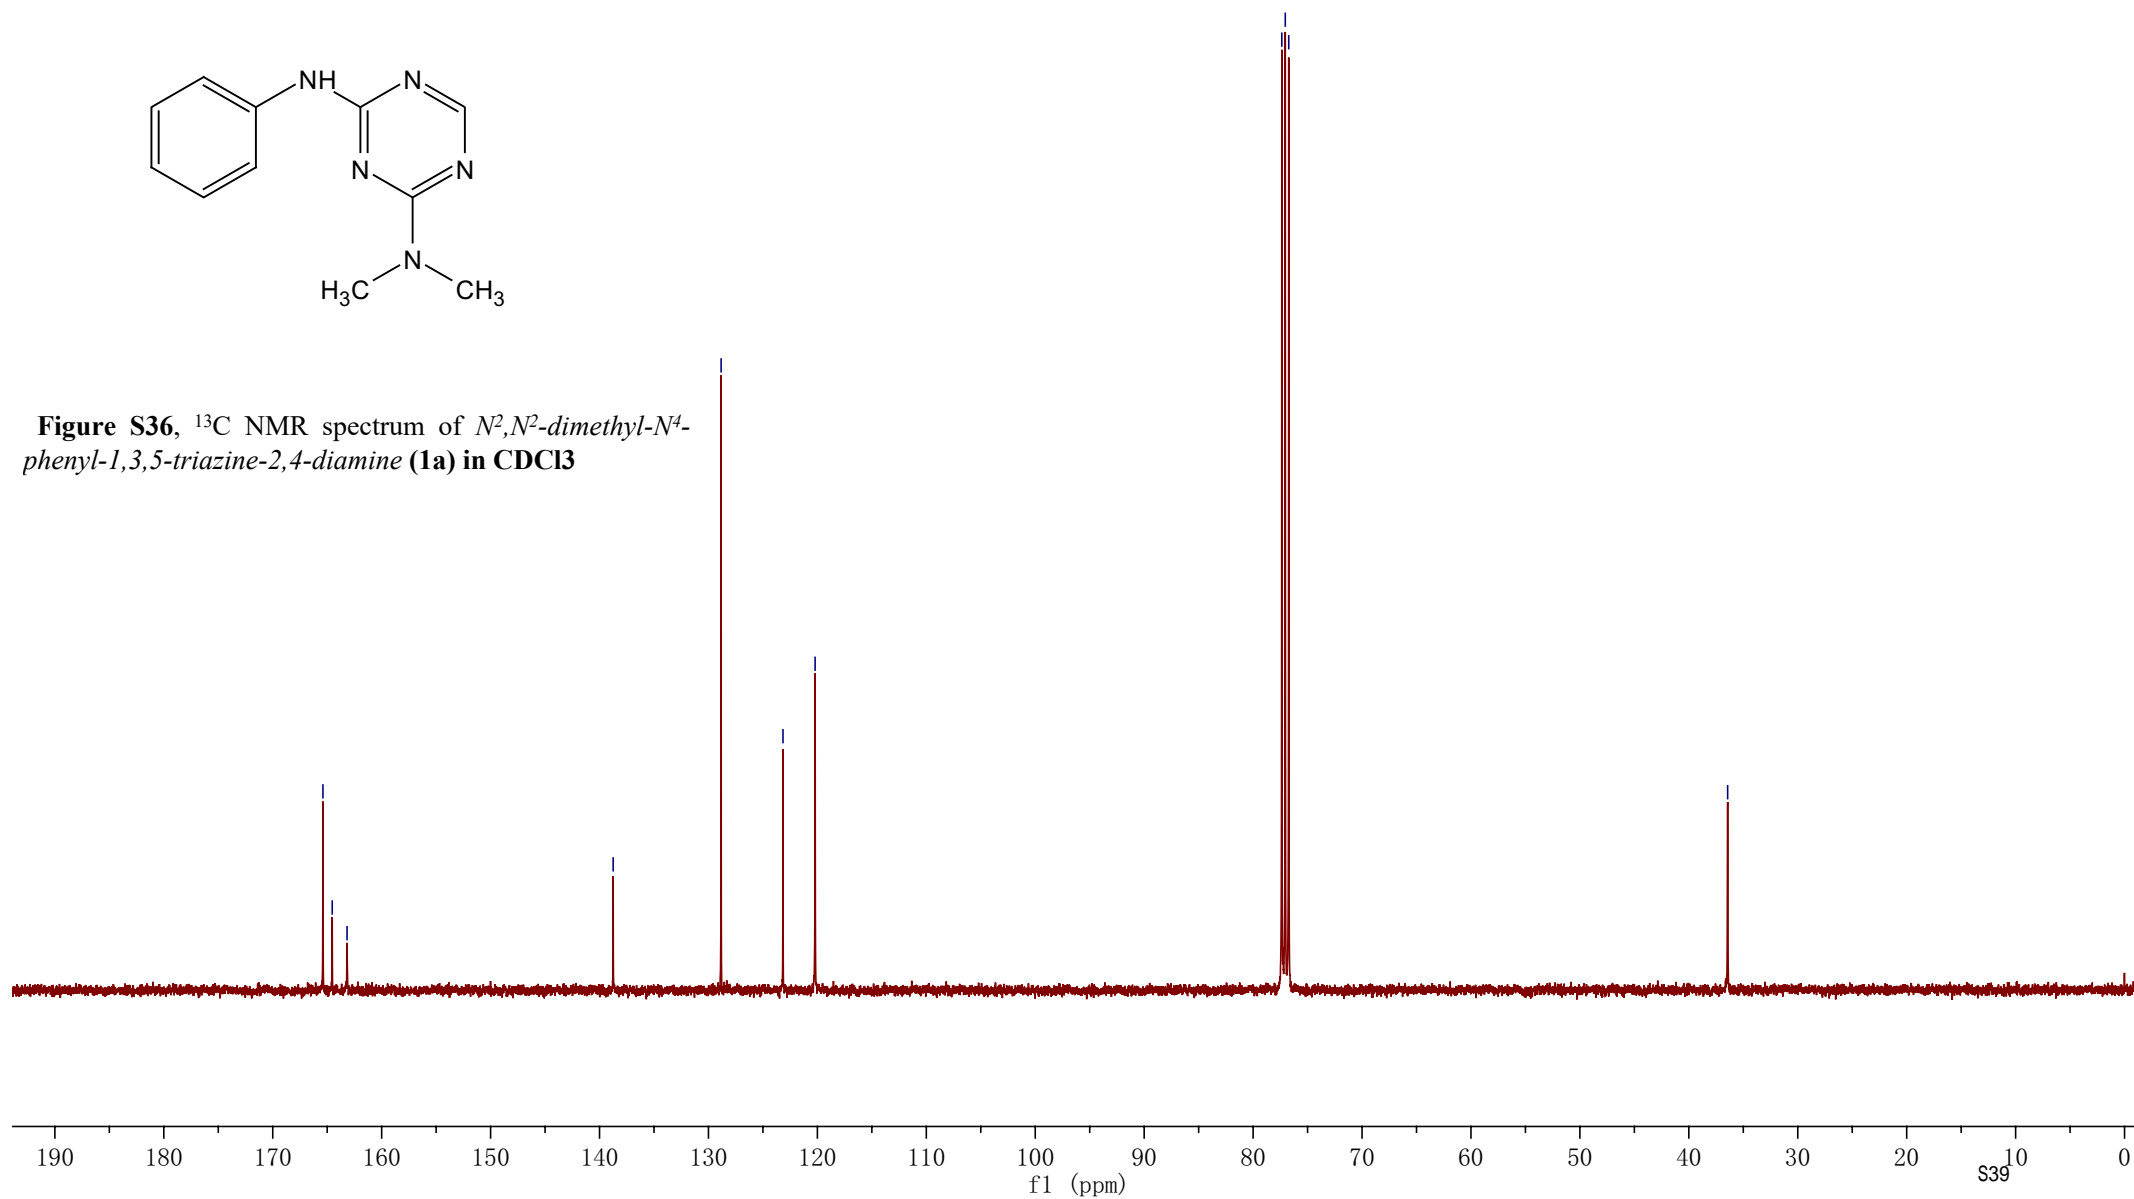

20230412zm  
1j CDCl<sub>3</sub>

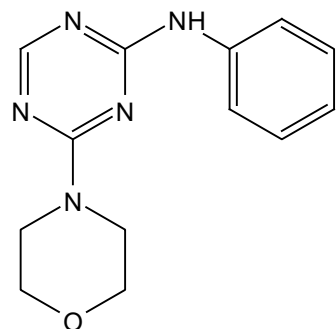

8.3099  
7.5816  
7.5625  
7.3781  
7.3592  
7.3385  
7.2815  
7.1245  
7.1060  
7.0875

3.8624  
3.7737  
3.7611  
3.7500

**Figure S37**, <sup>1</sup>H NMR spectrum of *4-morpholino-N-phenyl-1,3,5-triazin-2-amine (1j)* in CDCl<sub>3</sub>

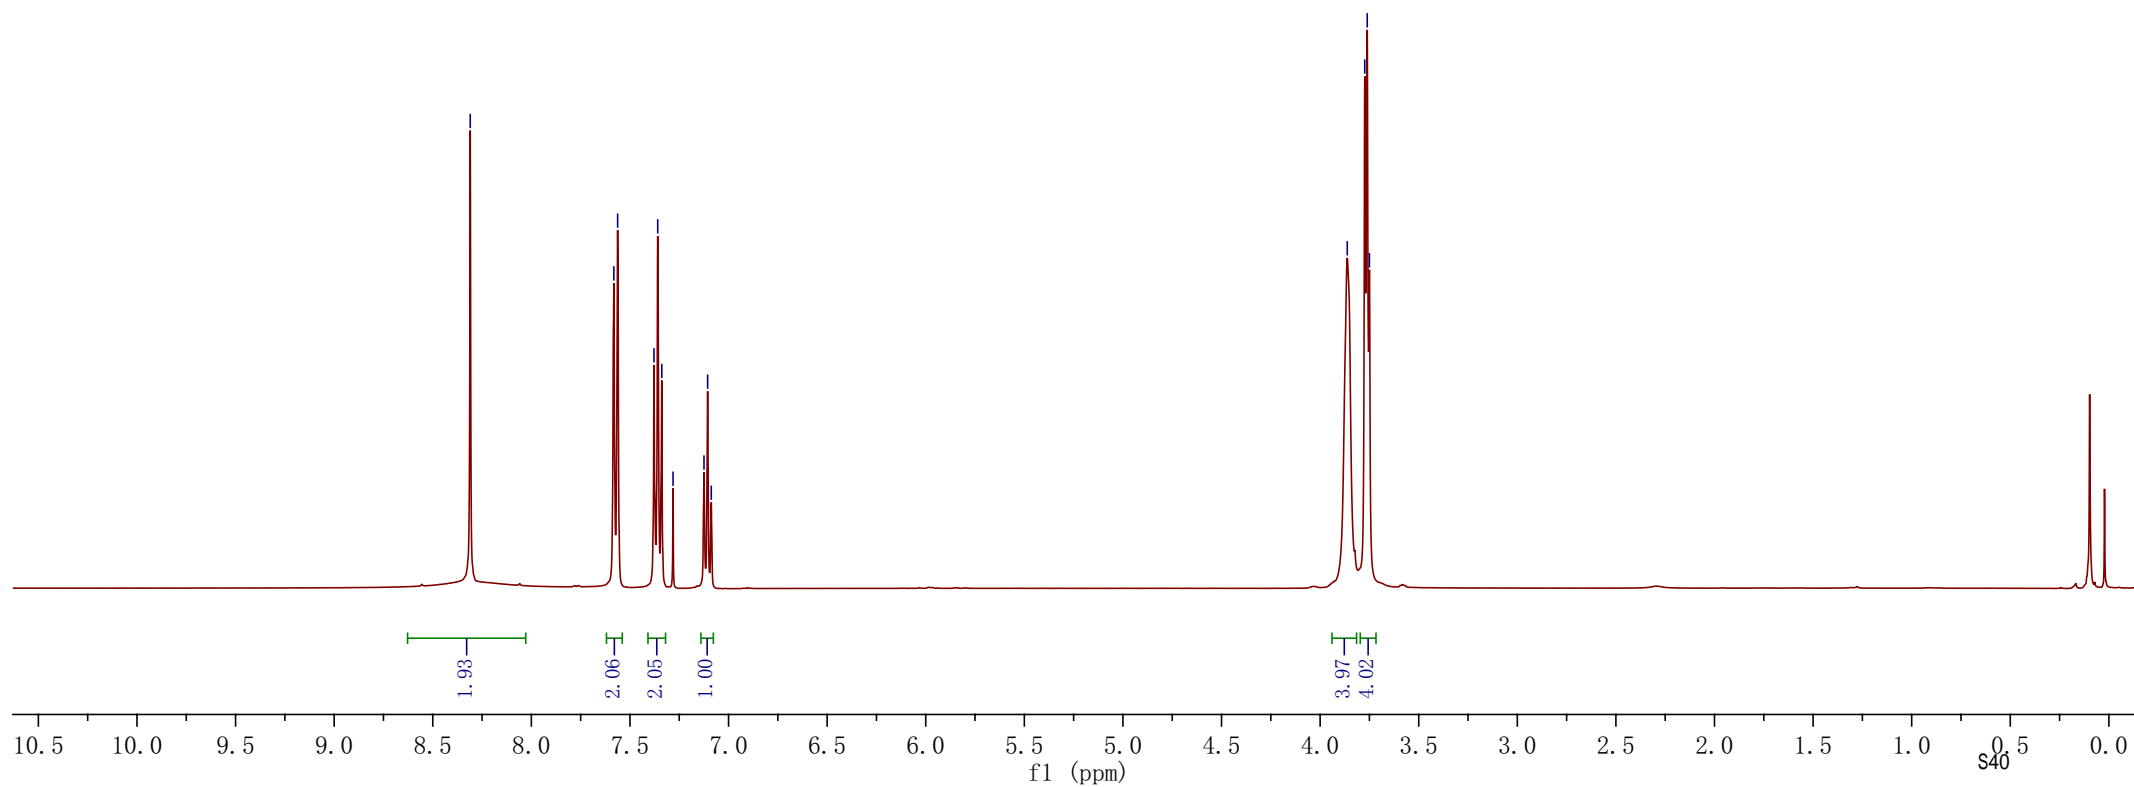

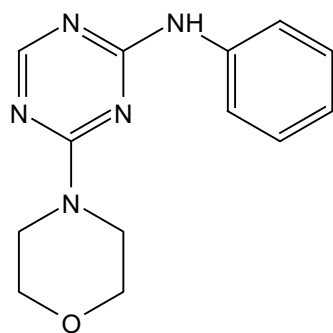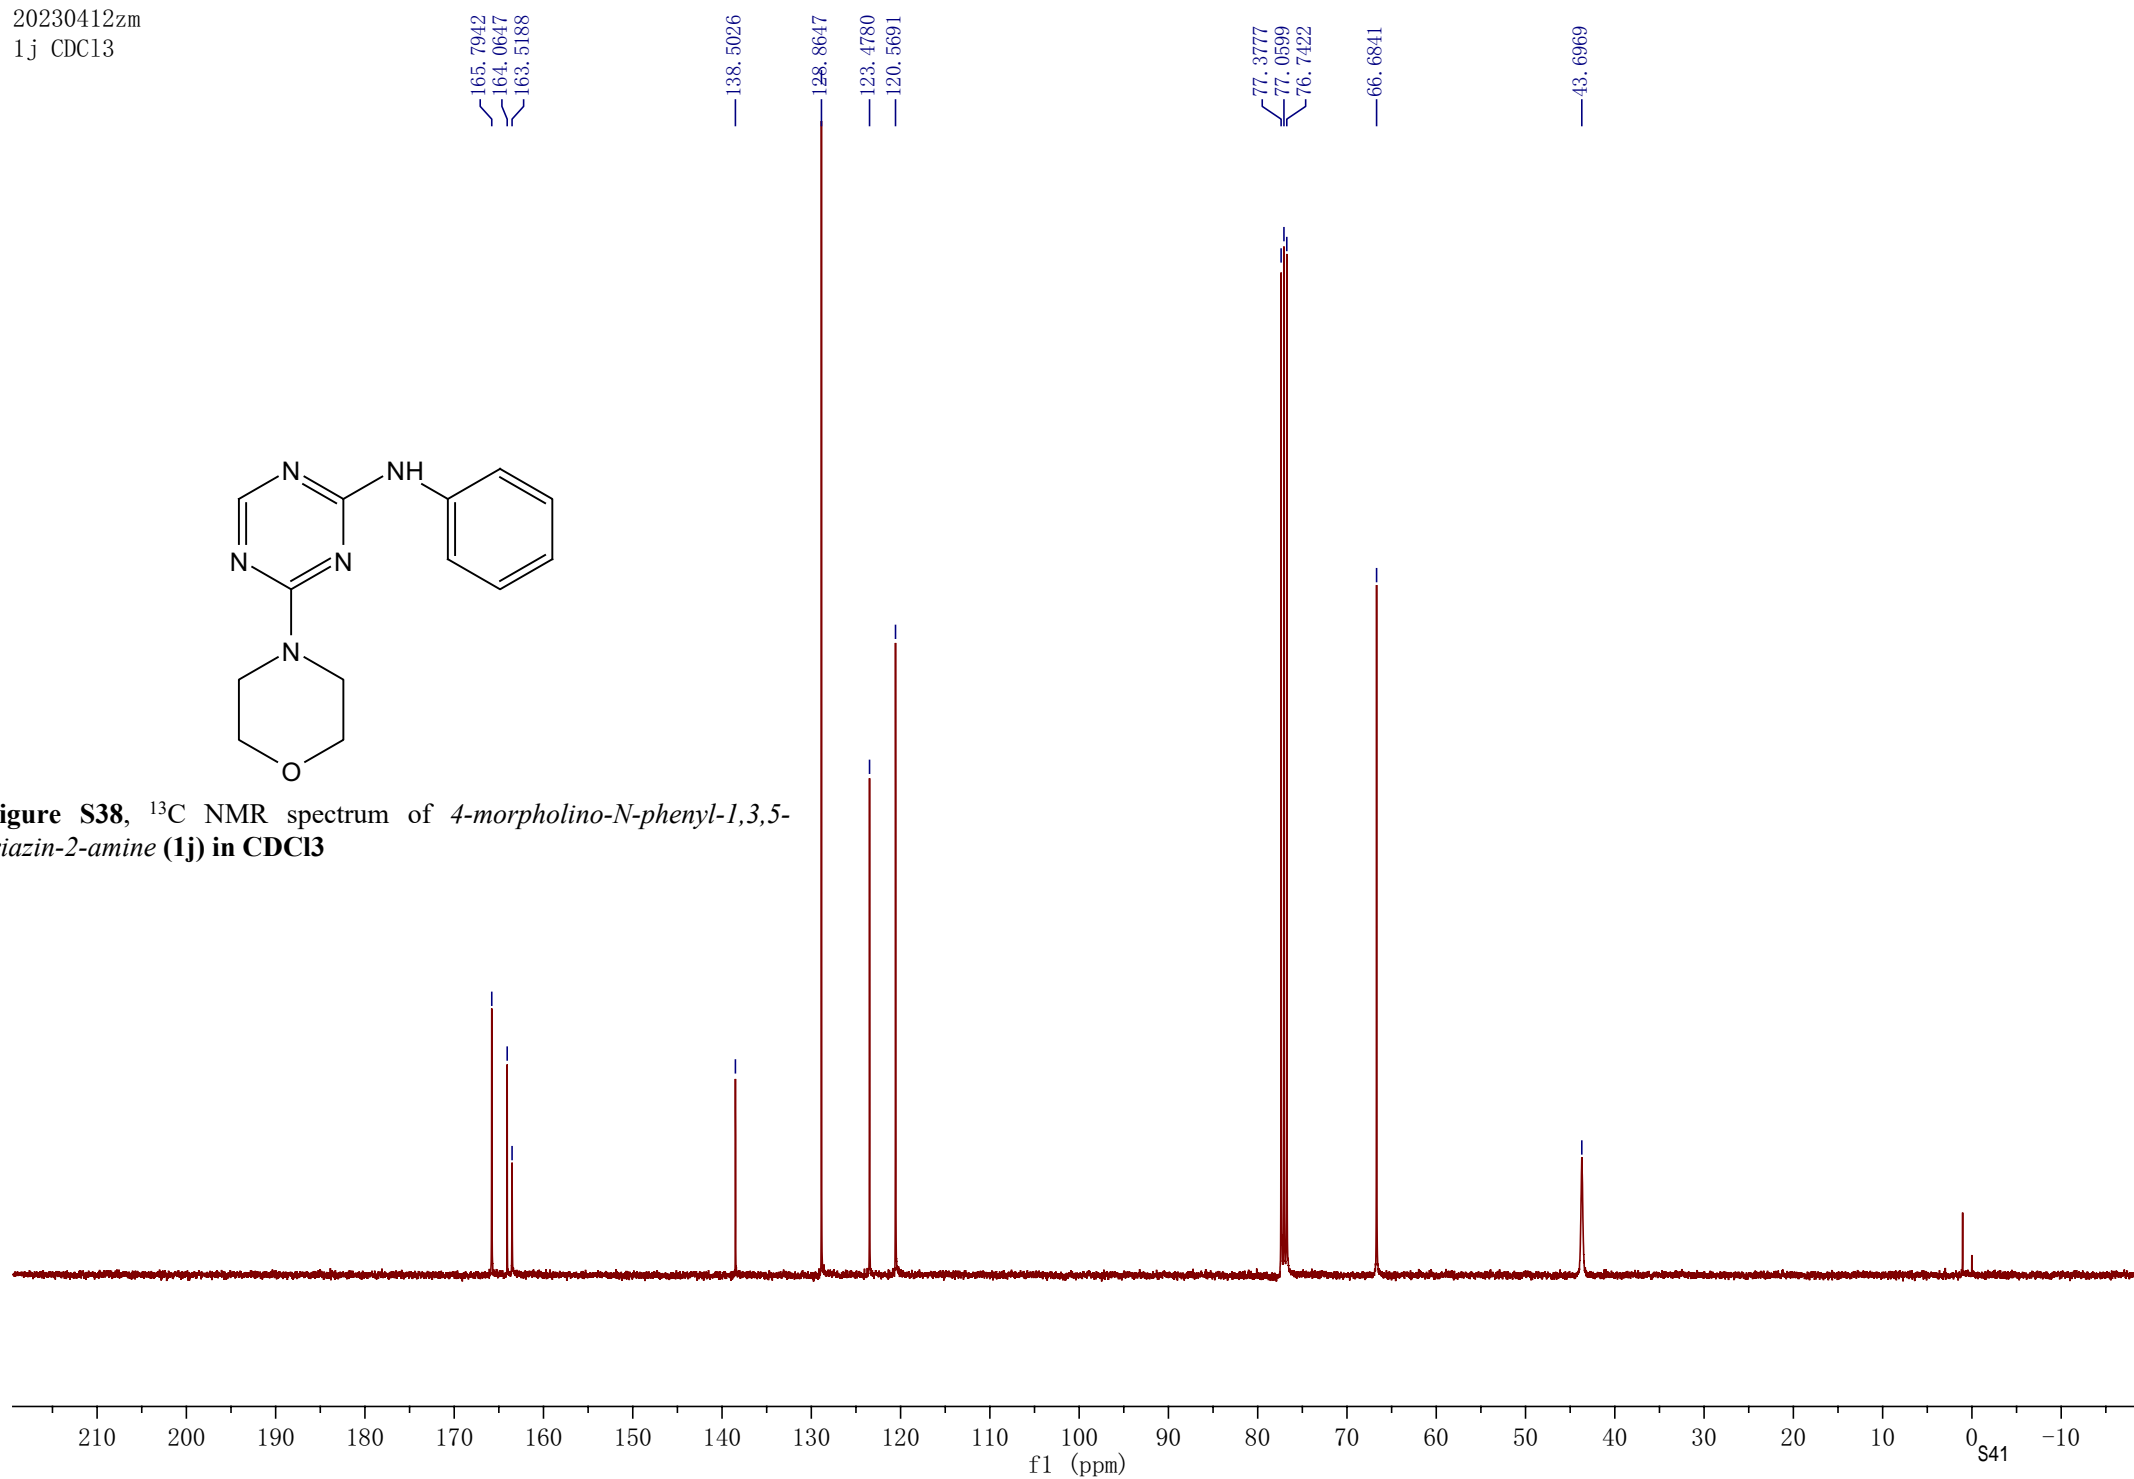

**Figure S38,** <sup>13</sup>C NMR spectrum of 4-morpholino-N-phenyl-1,3,5-triazin-2-amine (**1j**) in CDCl<sub>3</sub>

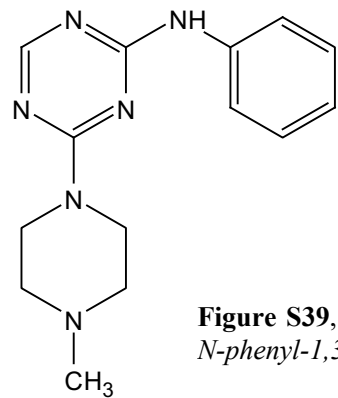

**Figure S39,** <sup>1</sup>H NMR spectrum of 4-(4-methylpiperazin-1-yl)-*N*-phenyl-1,3,5-triazin-2-amine (**1k**) in CDCl<sub>3</sub>

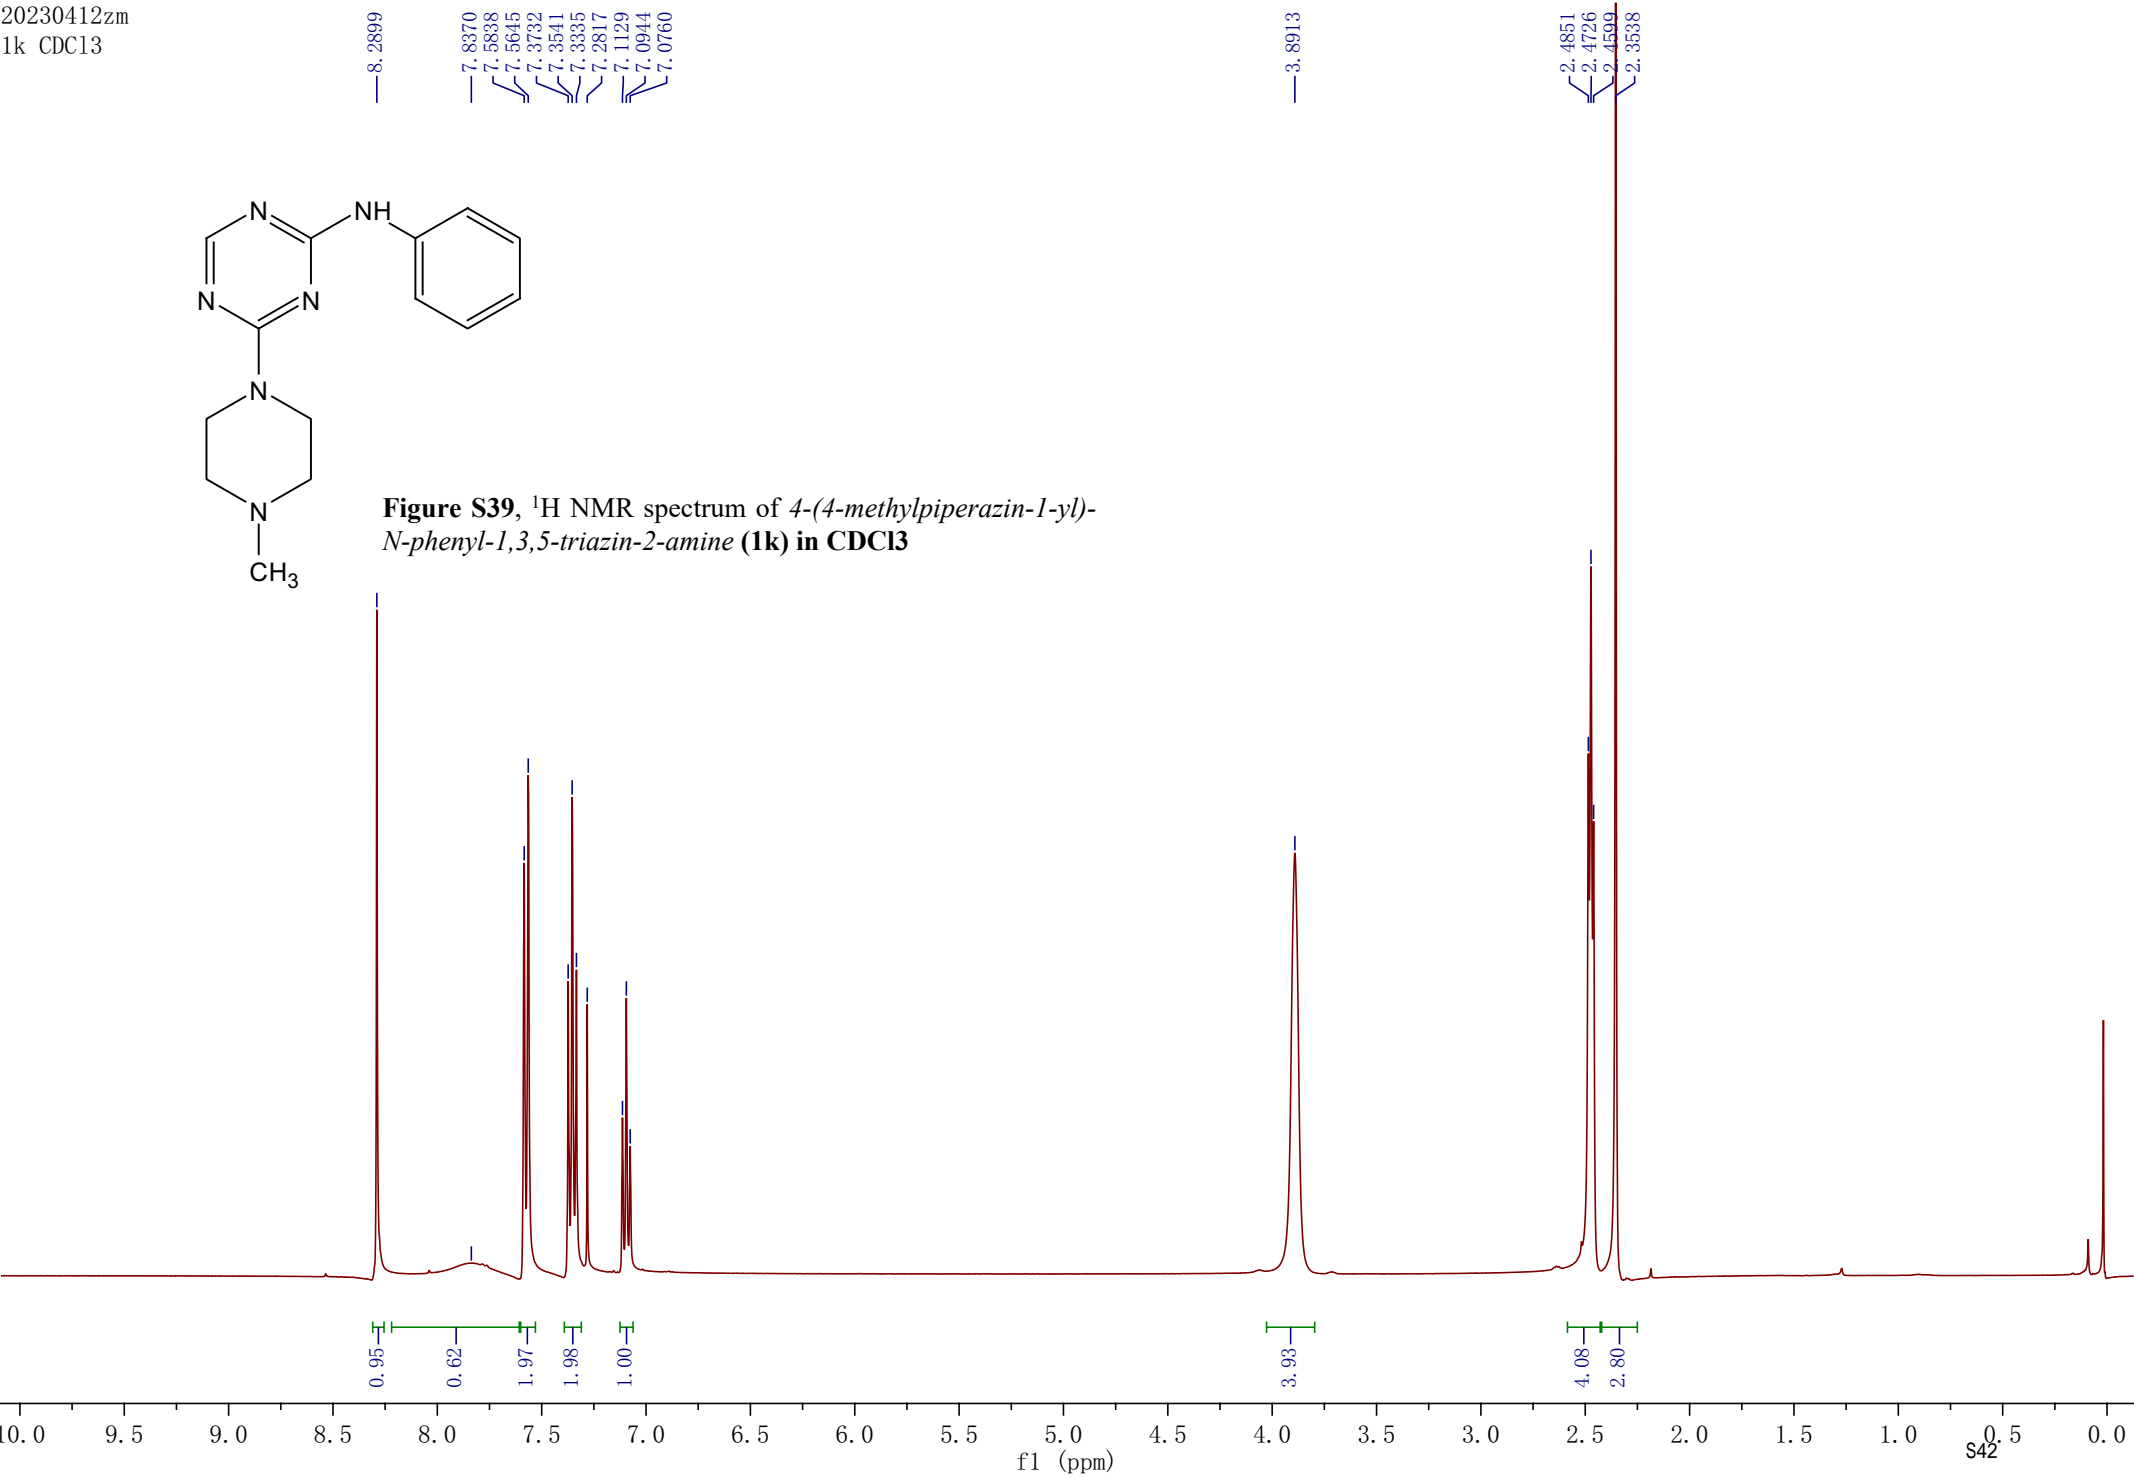

20230412zm  
1k CDCl<sub>3</sub>

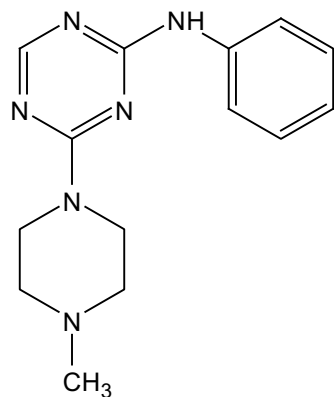

165.8184  
163.8658  
163.5359

138.5601

128.8527

123.3341

120.4190

77.3552  
77.2389  
77.0376  
76.7201

54.7750

46.1673

43.1069

**Figure S40,** <sup>13</sup>C NMR spectrum of 4-(4-methylpiperazin-1-yl)-*N*-phenyl-1,3,5-triazin-2-amine (**1k**) in CDCl<sub>3</sub>

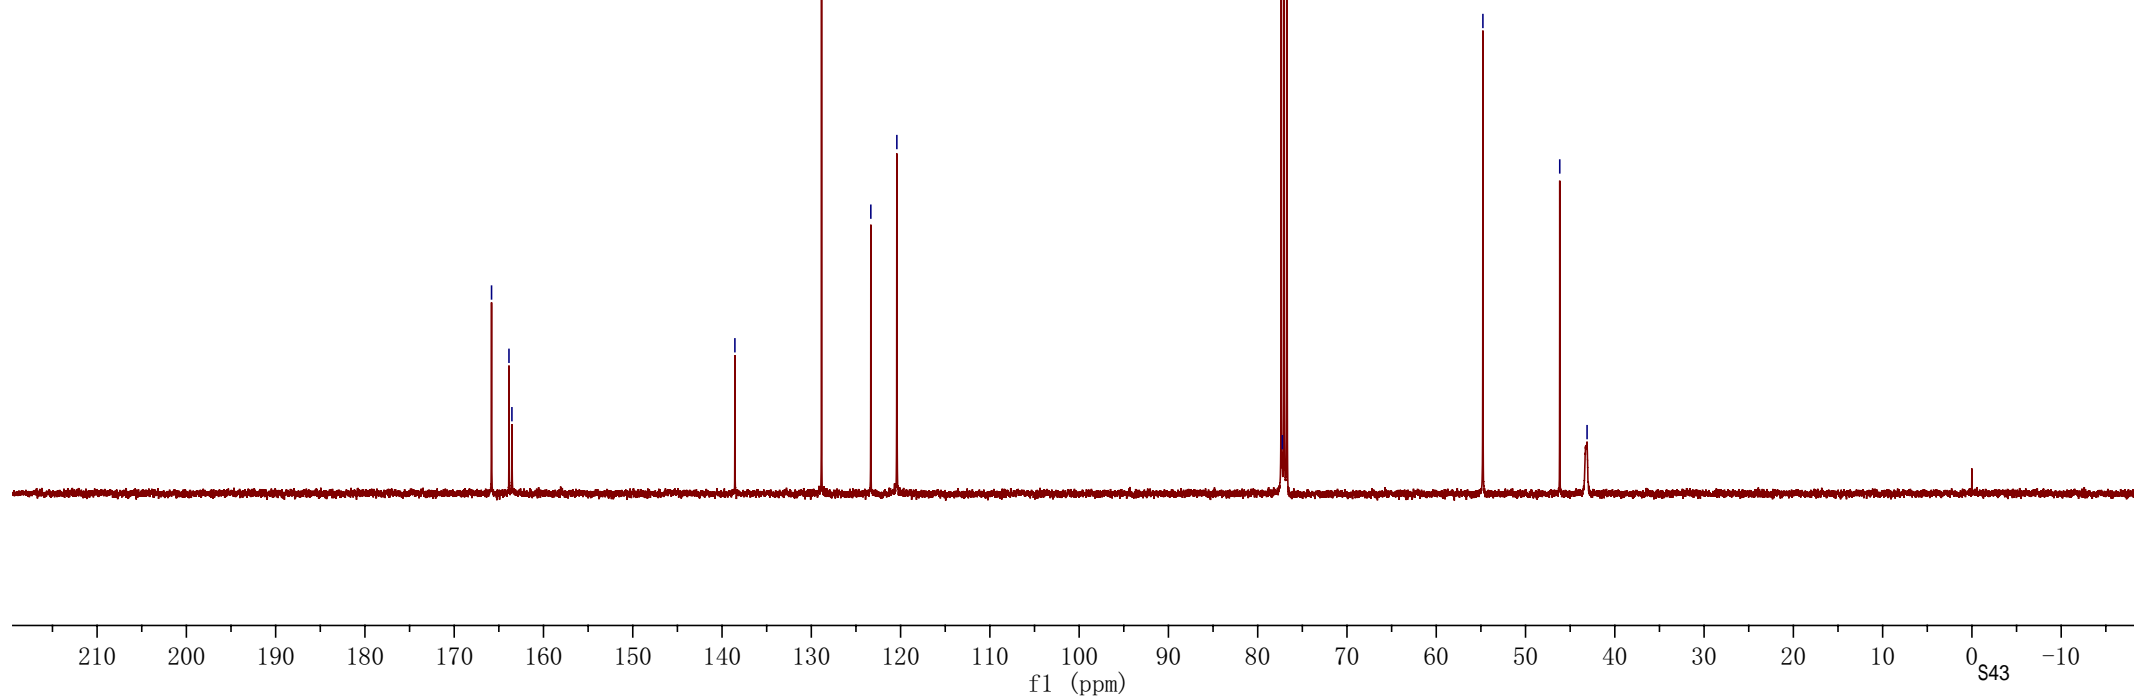

20230412zm  
1L CDC13

7.6469  
7.6445  
7.6254  
7.5804  
7.3482  
7.3294  
7.3085  
7.0714  
7.0530  
7.0345

3.2162  
3.2075

2.3471

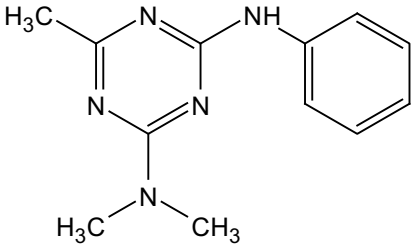

**Figure S41,** <sup>1</sup>H NMR spectrum of *N*<sup>2</sup>,*N*<sup>2</sup>,6-trimethyl-*N*<sup>4</sup>-phenyl-1,3,5-triazine-2,4-diamine (**1l**) in CDCl<sub>3</sub>

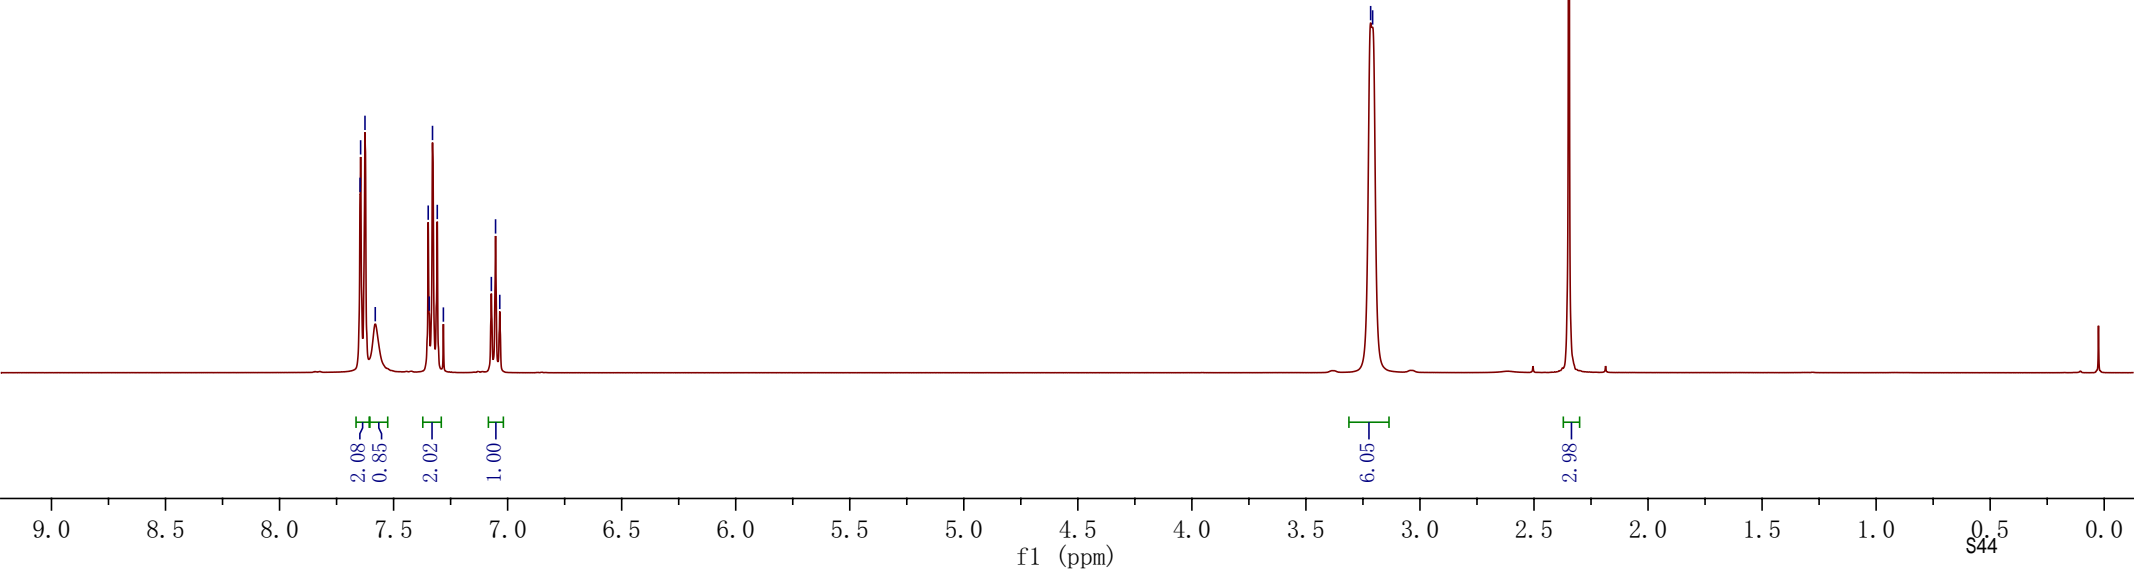



20230412zm  
1L CDCl3

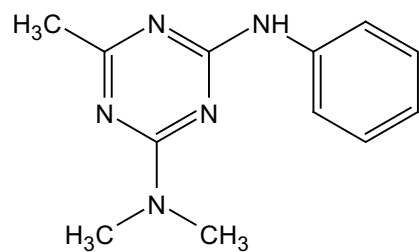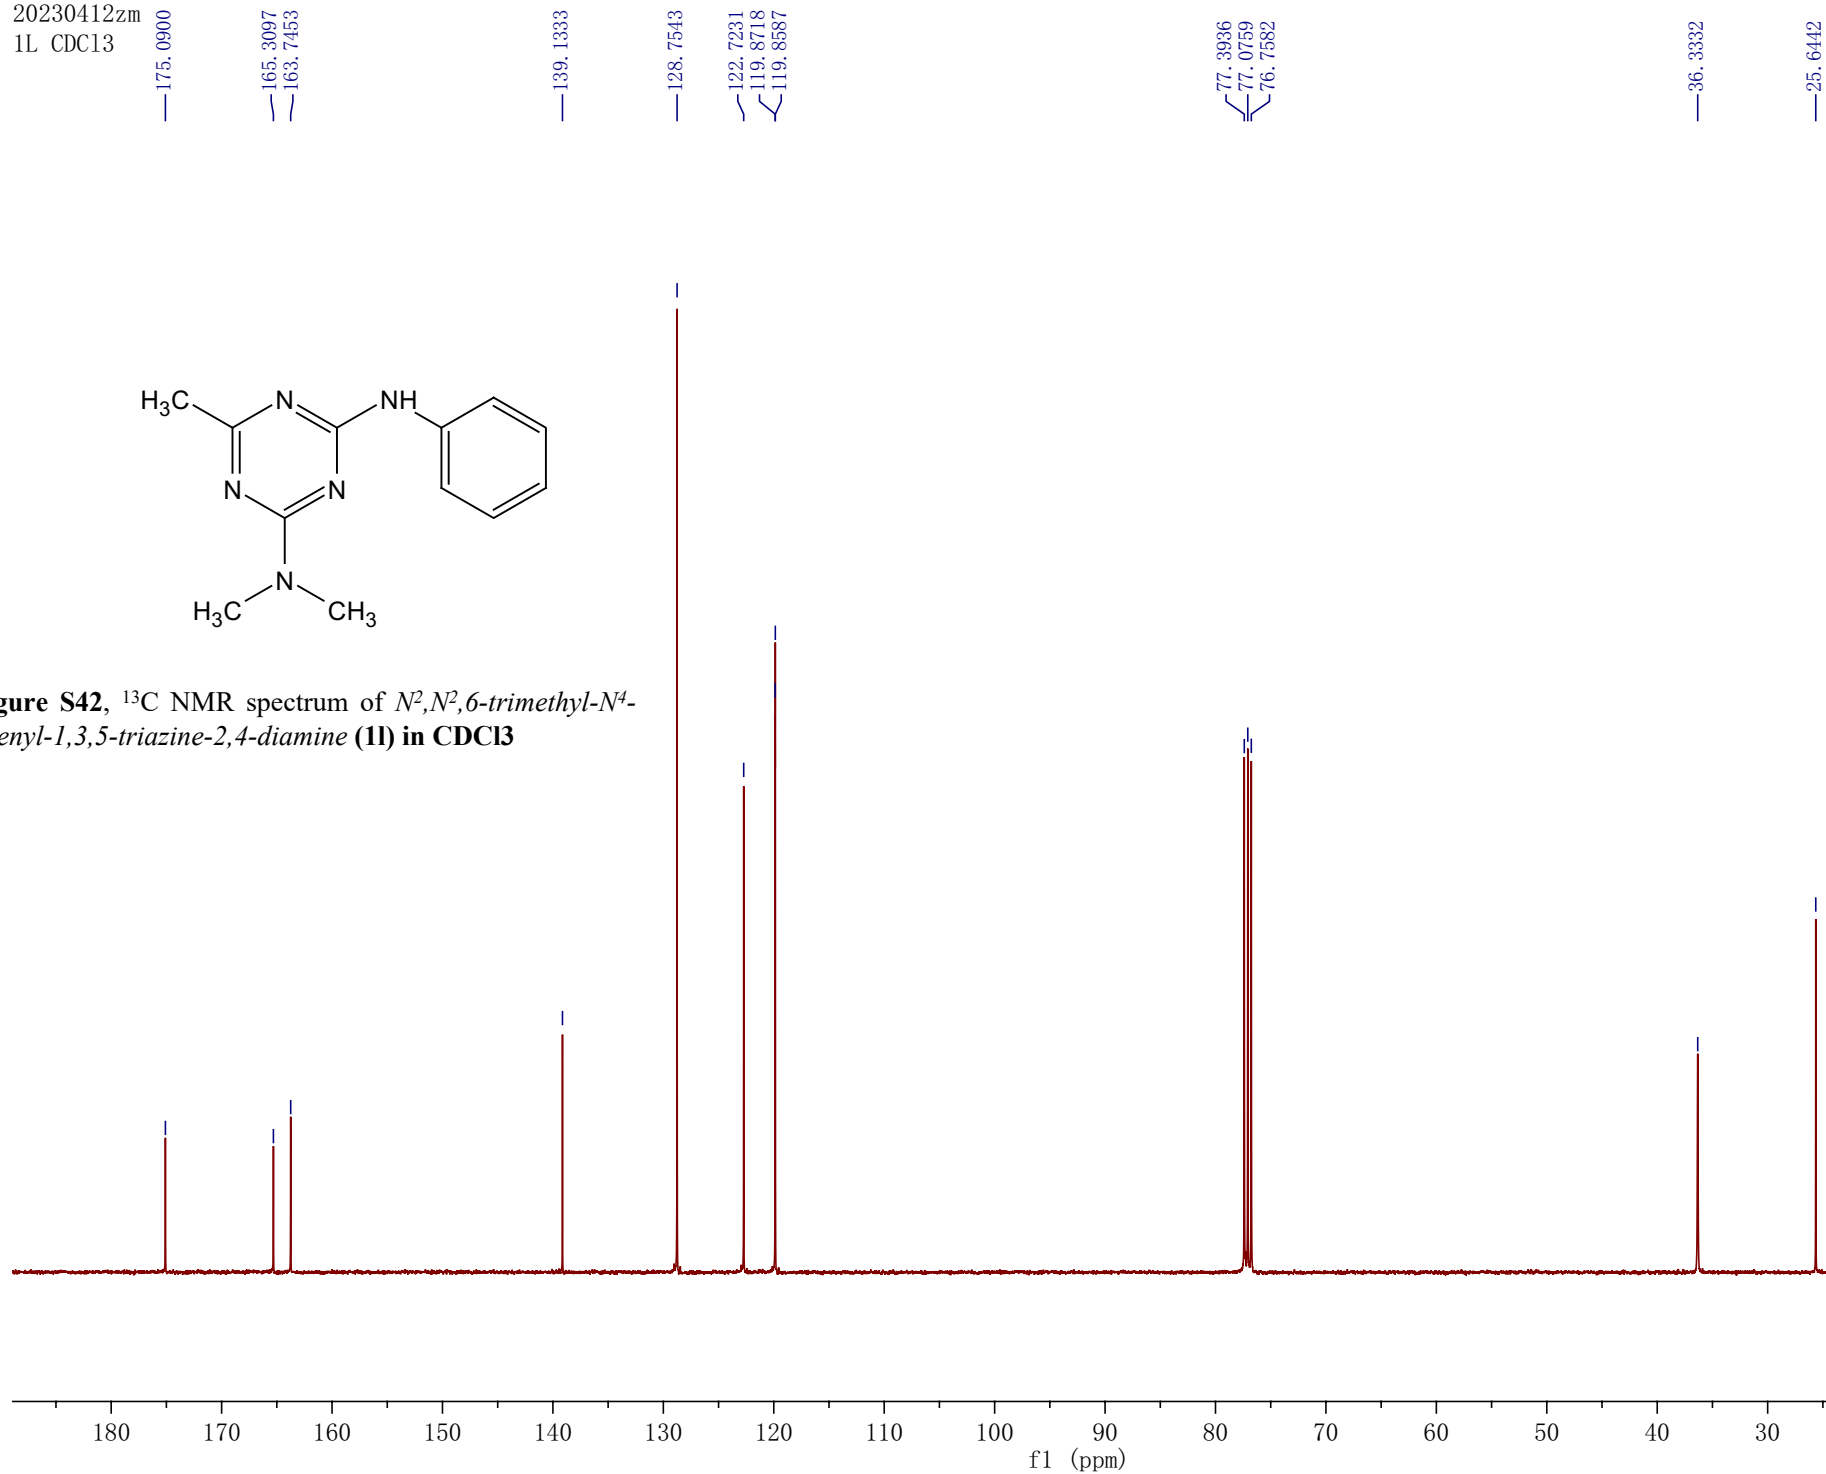

**Figure S42,** <sup>13</sup>C NMR spectrum of *N*<sup>2</sup>,*N*<sup>2</sup>,6-trimethyl-*N*<sup>4</sup>-phenyl-1,3,5-triazine-2,4-diamine (**1I**) in CDCl<sub>3</sub>

20211112zm  
f211104

8.5926  
8.5770  
8.5561

7.6283  
7.6088  
7.3888  
7.3687  
7.3504  
7.2927  
7.2811  
7.2739  
7.2555  
7.2193  
7.2146  
7.1978  
7.1317  
7.1141  
7.0669  
7.0469  
6.8817  
6.8606

3.8351

3.1455  
3.1337

2.5945  
2.5757  
2.5566  
2.4545

1.6793  
1.6614  
1.6428  
1.6243  
1.6060  
1.5880

0.9807  
0.9625  
0.9442

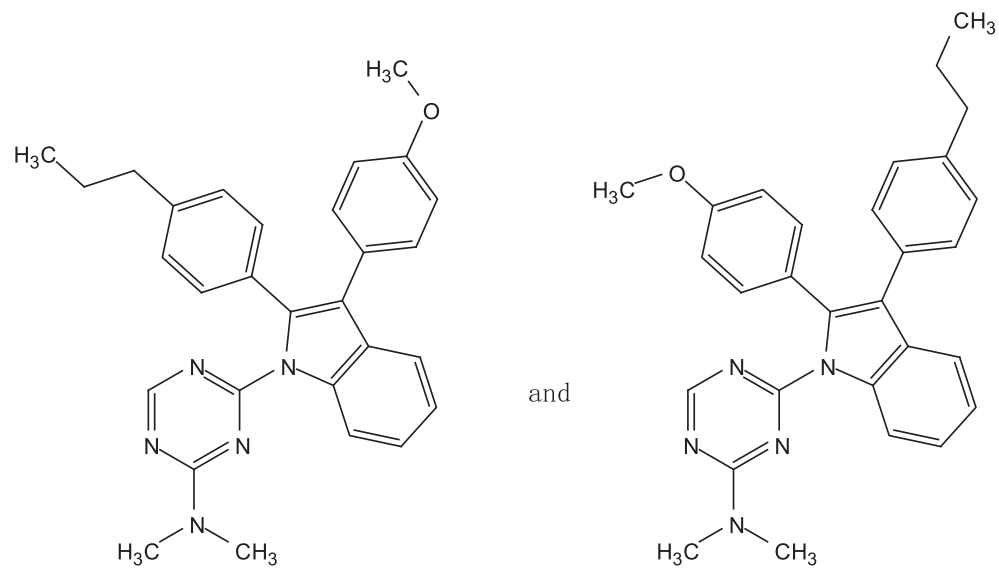

and

20211112zm  
f211104

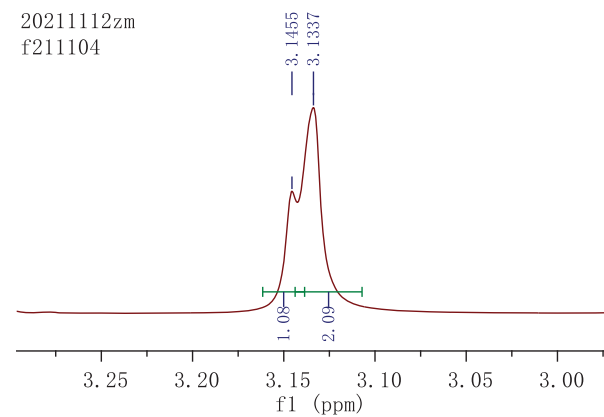

Figure S43. The isomers **3r** and **3r'**.

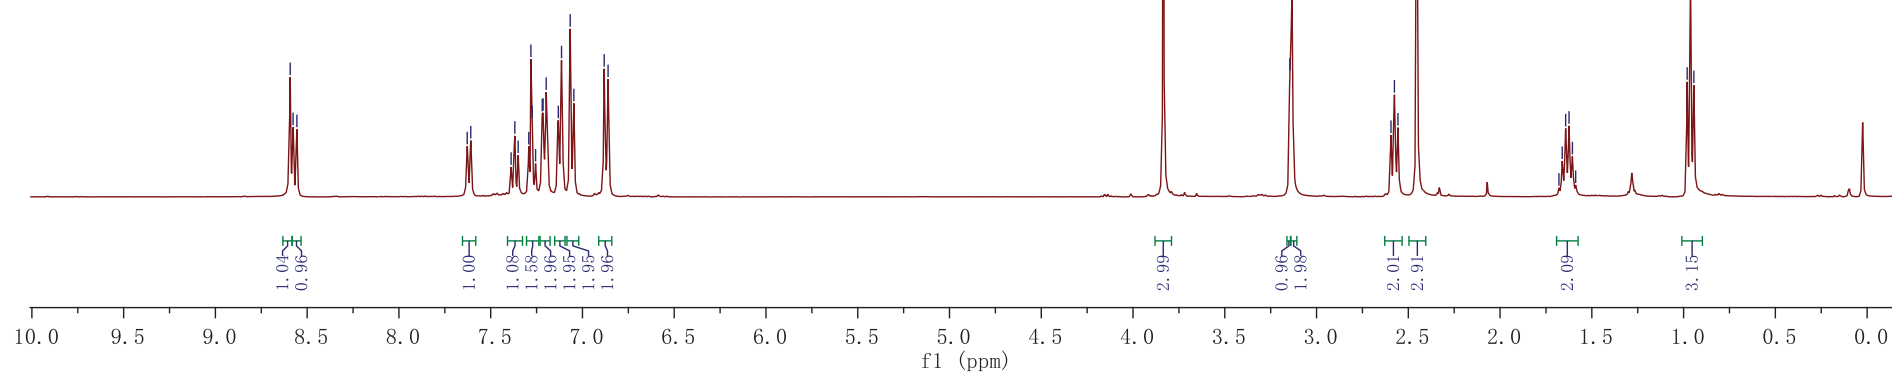

Supplement: s1 [file s1]
